# Supplementary material for: Catalytic intramolecular hydroamination of aminoallenes using titanium and tantalum complexes of sterically encumbered chiral sulfonamides
Source: Royal Society of Chemistry journal article supplement (doi:10.1039/d0dt02557g), 2020-01-01
Supplement: d0dt02557g1.pdf [file d0dt02557g1.pdf]

Electronic Supplementary Information for

**Catalytic intramolecular hydroamination of aminoallenes using titanium and tantalum complexes of sterically encumbered chiral sulfonamides**

Fanrui Sha<sup>†</sup>, Emily A. Shimizu<sup>†</sup>, Hannah S. Slocumb<sup>†</sup>, Sydney E. Towell<sup>†</sup>, Yi Zhen<sup>†</sup>, Hanna Z. Porter<sup>†</sup>, Michael K. Takase<sup>‡</sup>, and Adam R. Johnson<sup>†,\*</sup>

<sup>†</sup>Harvey Mudd College, 301 Platt Blvd., Claremont, CA 91711

<sup>‡</sup>Beckman Institute, California Institute of Technology, Pasadena, CA 91125

|                                                                                                                                                 |         |
|-------------------------------------------------------------------------------------------------------------------------------------------------|---------|
| 1. Complete thermal ellipsoid drawing of L-H <sub>2</sub> <b>Ph1</b> .....                                                                      | S2      |
| 2. Hydrogen bonding network of L-H <sub>2</sub> <b>Ph1</b> .....                                                                                | S3      |
| 3. Complete thermal ellipsoid drawing of <b>TiPh3</b> {Ti( <b>Ph3</b> )(NMe <sub>2</sub> ) <sub>2</sub> (HNMe <sub>2</sub> )} .....             | S4      |
| 4. Table S1: Crystal data and refinement for L-H <sub>2</sub> <b>Ph1</b> , <b>TiPh3</b> ,<br><b>TaPh1</b> , <b>TaPh2</b> and <b>TaPh3</b> ..... | S5      |
| 5. Complete thermal ellipsoid drawing of <b>TaPh1</b> {Ta( <b>Ph1</b> )(NMe <sub>2</sub> ) <sub>3</sub> } .....                                 | S6      |
| 6. Complete thermal ellipsoid drawing of <b>TaPh2</b> {Ta( <b>Ph2</b> )(NMe <sub>2</sub> ) <sub>3</sub> } .....                                 | S7      |
| 7. Derivation and explanation of DOSY equations .....                                                                                           | S8      |
| 8. NMR ( <sup>1</sup> H, <sup>13</sup> C, <sup>19</sup> F, chiral shift) and IR spectra of ligands .....                                        | S9-S22  |
| 9. NMR spectra ( <sup>1</sup> H, <sup>13</sup> C) of metal complexes .....                                                                      | S23-S43 |
| 10. DOSY NMR spectra for Ti/Ta complexes .....                                                                                                  | S44-S51 |
| 11. GC analyses for hydroamination reactions .....                                                                                              | S52-S68 |
| 12. References .....                                                                                                                            | S69     |

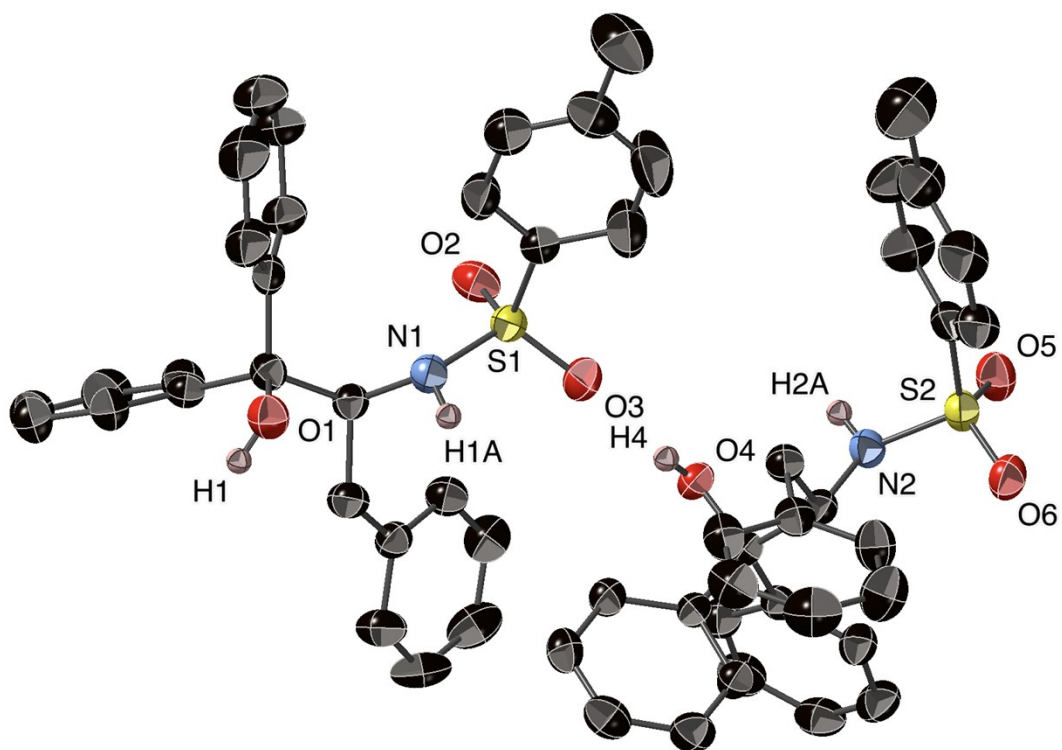

**Figure S1** Thermal ellipsoid drawing of L-H<sub>2</sub>Ph<sub>1</sub> (hydrogen atoms except H(1), H(1A), H(2A) and H(4) are omitted for clarity; ellipsoids shown at 50% probability).

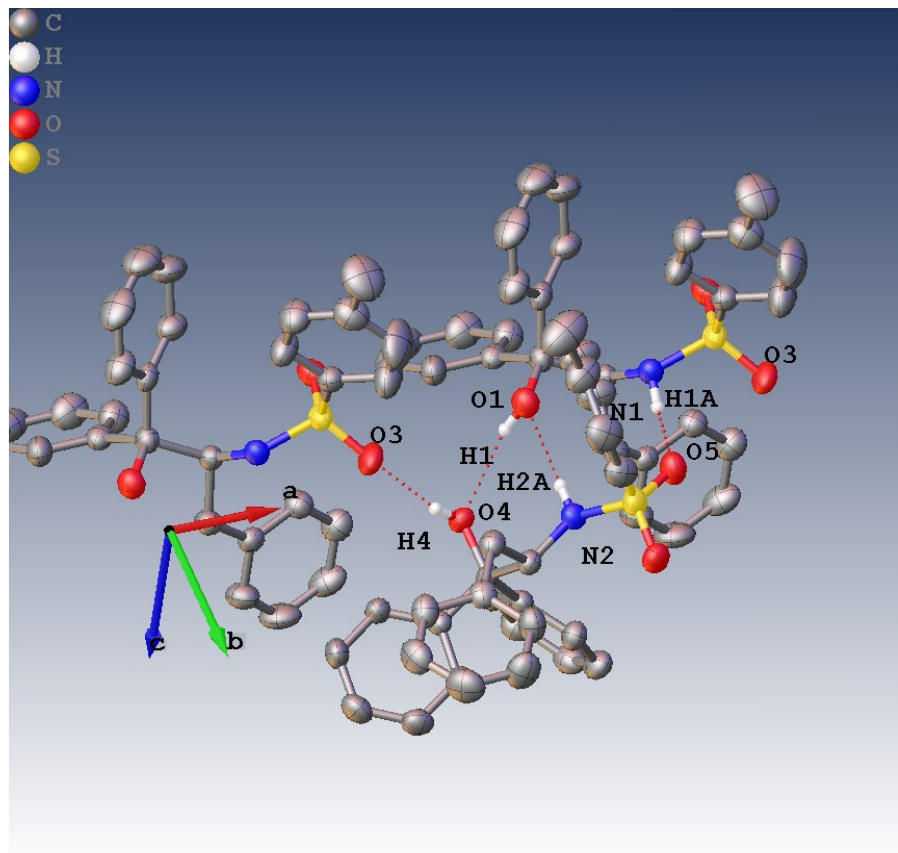

**Figure S2** Thermal ellipsoid drawing of L-H<sub>2</sub>Ph1 (hydrogen atoms except H(1), H(1A), H(2A) and H(4) are omitted for clarity; ellipsoids shown at 50% probability).

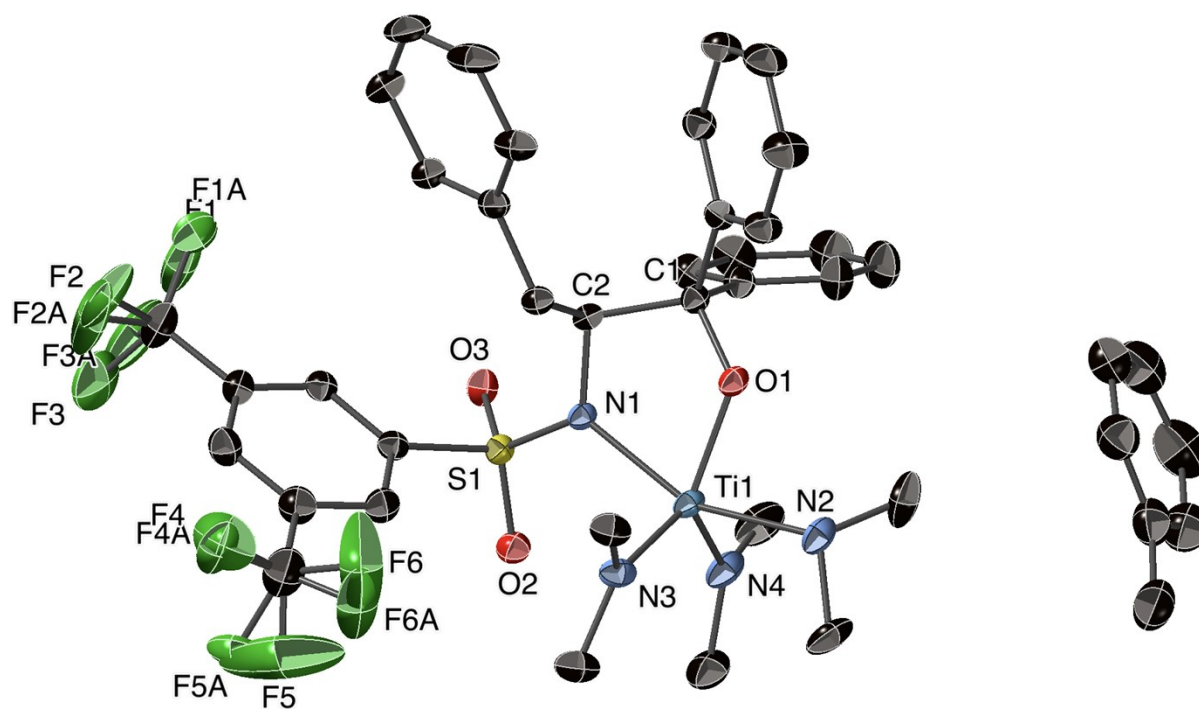

**Figure S3** Thermal ellipsoid drawing of complex **TiPh3** showing one solvent molecule of toluene (hydrogen atoms are omitted for clarity; thermal ellipsoids are shown at 50% probability). F(1), F(2) and F(3) are modeled at 0.56 occupancy; F(1A), F(2A) and F(3A) are modeled at 0.44 occupancy; F(4), F(5) and F(6) are modeled at 0.52 occupancy; F(4A), F(5A) and F(6A) are modeled at 0.48 occupancy.

**Table S1.** Crystal data and structure refinement for L-H<sub>2</sub>Ph1, TiPh3, TaPh1, TaPh2 and TaPh3.

| Compound                                          | L-H <sub>2</sub> Ph1                              | TiPh3                                                                            | TaPh1                                                             | TaPh2                                                                            | TaPh3                                                                            |
|---------------------------------------------------|---------------------------------------------------|----------------------------------------------------------------------------------|-------------------------------------------------------------------|----------------------------------------------------------------------------------|----------------------------------------------------------------------------------|
| CCDC code                                         | 1970364                                           | 1970810                                                                          | 1970808                                                           | 1970809                                                                          | 1970811                                                                          |
| Formula                                           | C <sub>28</sub> H <sub>27</sub> NO <sub>3</sub> S | C <sub>42</sub> H <sub>48</sub> F <sub>6</sub> N <sub>4</sub> O <sub>3</sub> STi | C <sub>34</sub> H <sub>43</sub> N <sub>4</sub> O <sub>3</sub> STa | C <sub>34</sub> H <sub>40</sub> F <sub>3</sub> N <sub>4</sub> O <sub>3</sub> STa | C <sub>35</sub> H <sub>39</sub> F <sub>6</sub> N <sub>4</sub> O <sub>3</sub> STa |
| Formula weight                                    | 457.56                                            | 850.8                                                                            | 768.73                                                            | 822.71                                                                           | 890.71                                                                           |
| Temperature, K                                    | 293(2)                                            | 100(2)                                                                           | 100(2)                                                            | 100(2)                                                                           | 100(2)                                                                           |
| Wavelength, Å                                     | 0.71073                                           | 1.54178                                                                          | 0.71073                                                           | 0.71073                                                                          | 1.54178                                                                          |
| Space group                                       | P2 <sub>1</sub>                                   | P2 <sub>1</sub> 2 <sub>1</sub> 2 <sub>1</sub>                                    | P2 <sub>1</sub> 2 <sub>1</sub> 2 <sub>1</sub>                     | P2 <sub>1</sub> 2 <sub>1</sub> 2 <sub>1</sub>                                    | P2 <sub>1</sub> 2 <sub>1</sub> 2 <sub>1</sub>                                    |
| a, Å                                              | 9.1955(3)                                         | 8.1293(8)                                                                        | 13.3873(10)                                                       | 10.0894(10)                                                                      | 8.8756(13)                                                                       |
| b, Å                                              | 15.8730(5)                                        | 21.067(2)                                                                        | 15.0633(13)                                                       | 11.9917(13)                                                                      | 11.4888(11)                                                                      |
| c, Å                                              | 16.3458(5)                                        | 24.630(2)                                                                        | 16.5240(13)                                                       | 28.308(3)                                                                        | 34.989(5)                                                                        |
| α, °                                              | 90                                                | 90                                                                               | 90                                                                | 90                                                                               | 90                                                                               |
| β, °                                              | 92.775(3)                                         | 90                                                                               | 90                                                                | 90                                                                               | 90                                                                               |
| γ, °                                              | 90                                                | 90                                                                               | 90                                                                | 90                                                                               | 90                                                                               |
| Volume, Å <sup>3</sup>                            | 2383.03(14)                                       | 4218.1(7)                                                                        | 3332.2(5)                                                         | 3424.9(6)                                                                        | 3567.8(8)                                                                        |
| Z                                                 | 4                                                 | 4                                                                                | 4                                                                 | 4                                                                                | 4                                                                                |
| Density (calcd)<br>Mg/m <sup>3</sup>              | 1.275                                             | 1.340                                                                            | 1.532                                                             | 1.596                                                                            | 1.658                                                                            |
| μ, mm <sup>-1</sup>                               | 0.166                                             | 2.776                                                                            | 3.400                                                             | 3.326                                                                            | 6.865                                                                            |
| θ range for data<br>collection, °                 | 1.8710 to<br>24.1390°.                            | 2.760 to 74.427°.                                                                | 1.829 to 36.392°.                                                 | 1.439 to 36.399°.                                                                | 2.526 to 74.559°.                                                                |
| Reflections<br>measured                           | 72070                                             | 52021                                                                            | 72114                                                             | 73514                                                                            | 41686                                                                            |
| Independent<br>observed reflns.<br>[I>2σ]         | 14398                                             | 8503                                                                             | 15757                                                             | 16612                                                                            | 7123                                                                             |
| Data / restraints /<br>parameters                 | 14398 / 1 / 603                                   | 8503 / 272 / 580                                                                 | 15757 / 267 / 450                                                 | 16612 / 66 / 449                                                                 | 7123 / 0 / 457                                                                   |
| Rint                                              | 0.0548                                            | 0.0479                                                                           | 0.0400                                                            | 0.0496                                                                           | 0.0459                                                                           |
| Final R indices<br>[I>2σ(I)]                      | R1 = 0.0562, wR2<br>= 0.0993                      | R1 = 0.0326, wR2<br>= 0.0828                                                     | R1 = 0.0180, wR2<br>= 0.0375                                      | R1 = 0.0236, wR2<br>= 0.0419                                                     | R1 = 0.0205, wR2<br>= 0.0506                                                     |
| R indices (all data)                              | R1 = 0.0947, wR2<br>= 0.1117                      | R1 = 0.0349, wR2<br>= 0.0847                                                     | R1 = 0.0201, wR2<br>= 0.0380                                      | R1 = 0.0290, wR2<br>= 0.0430                                                     | R1 = 0.0205, wR2<br>= 0.0506                                                     |
| Goodness-of-fit on<br>F <sup>2</sup>              | 1.016                                             | 1.037                                                                            | 0.993                                                             | 1.016                                                                            | 1.082                                                                            |
| Flack parameter                                   | -0.01(3)                                          | 0.056(3)                                                                         | 0.007(2)                                                          | 0.012(2)                                                                         | 0.084(4)                                                                         |
| Largest diff. peak<br>and hole, e Å <sup>-3</sup> | 0.30 and -0.28                                    | 0.487 and -0.219                                                                 | 0.533 and -1.202                                                  | 0.928 and -1.624                                                                 | 0.494 and -1.376                                                                 |

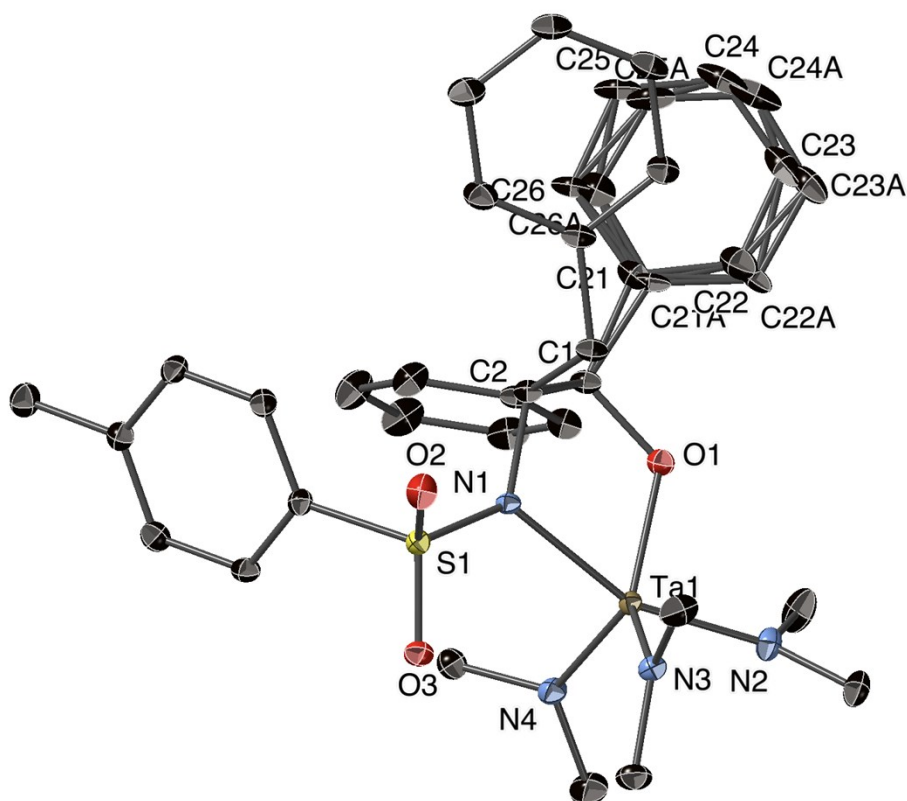

**Figure S4** Thermal ellipsoid drawing of complex **TaPh1** (hydrogen atoms are omitted for clarity; thermal ellipsoids are shown at 50% probability). C(21)-C(26) are modeled at 0.58 occupancy; C(21A)-C(26A) are modeled at 0.42 occupancy. Selected bond distances (Å) and angles (°): Ta(1)-N(3) 1.9452(18), Ta(1)-N(4) 1.9558(17), Ta(1)-O(1) 1.9649(15), Ta(1)-N(2) 1.9859(17), Ta(1)-N(1) 2.1952(15), N(3)-Ta(1)-N(4) 112.57(8), N(3)-Ta(1)-O(1) 130.78(7), N(4)-Ta(1)-O(1) 116.32(7), N(3)-Ta(1)-N(2) 93.03(8), N(4)-Ta(1)-N(2) 95.72(7), O(1)-Ta(1)-N(2) 87.69(7), N(3)-Ta(1)-N(1) 91.92(6), N(4)-Ta(1)-N(1) 101.48(6), O(1)-Ta(1)-N(1) 73.47(6), N(2)-Ta(1)-N(1) 158.68(7).

The geometry around the tantalum center in **TaPh1** is best described as a distorted trigonal bipyramid with  $R_c(x)$  parameter of 9.39 for trigonal bipyramidal and 18.71 for square pyramidal.<sup>1</sup> The  $\tau$  parameter is 0.47.<sup>2</sup> The TBP axis is between the ligand nitrogen N(1) and the NMe<sub>2</sub> nitrogen N(2) (Figure 3). One of the phenyl groups was disordered over two positions. Comparing to ligand structure in (Figure 1), the O-C-C-N dihedral angle reorients upon coordination to rotate the CPh<sub>2</sub> group by approximately 120° bringing the oxygen into a five-membered ring along with Ta(1), N(1), C(2), and C(1). The ArSO<sub>2</sub> substituent on the sulfonamide also rotates away to prevent steric interactions between the tolyl group and the Ta(NMe<sub>2</sub>)<sub>3</sub> portion of the molecule.

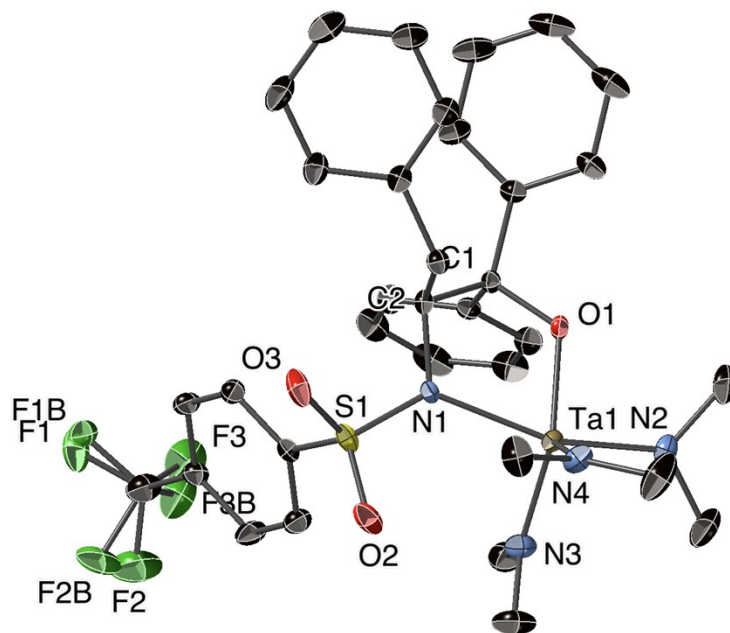

**Figure S5** Thermal ellipsoid drawing of complex **TaPh<sub>2</sub>** (hydrogen atoms are omitted for clarity; thermal ellipsoids are shown at 50% probability). F(1), F(2) and F(3) are modeled at 0.54 occupancy; F(1B), F(2B) and F(3B) are modeled at 0.46 occupancy. Selected bond distances (Å) and angles (°): Ta(1)-N(3) 1.948(2), Ta(1)-N(4) 1.960(2), Ta(1)-O(1) 1.9705(17), Ta(1)-N(2) 1.993(2), Ta(1)-N(1) 2.1720(19), N(3)-Ta(1)-N(4) 106.34(10), N(3)-Ta(1)-O(1) 137.55(8), N(4)-Ta(1)-O(1) 116.03(8), N(3)-Ta(1)-N(2) 93.35(10), N(4)-Ta(1)-N(2) 96.56(9), O(1)-Ta(1)-N(2) 84.67(8), N(3)-Ta(1)-N(1) 95.53(9), N(4)-Ta(1)-N(1) 102.11(9), O(1)-Ta(1)-N(1) 73.85(7), N(2)-Ta(1)-N(1) 156.12(8).

The geometry around the tantalum center in **TaPh<sub>2</sub>** is best described as a distorted trigonal bipyramid with  $R_c(x)$  parameter of 11.35 for trigonal bipyramidal and 17.21 for square pyramidal.<sup>1</sup> The  $\tau$  parameter is 0.31.<sup>2</sup> The TBP axis is between the ligand nitrogen N(1) and the NMe<sub>2</sub> nitrogen N(2). The CF<sub>3</sub> group was disordered over two positions.

## Derivation of DOSY equations

Solutions of all eight Ti and Ta complexes were prepared in C<sub>6</sub>D<sub>6</sub> and their diffusion constants were determined as an average value calculated from fits to the signal intensity for two regions of the spectra: an aryl signal and an NMe<sub>2</sub> signal. Intensity was found to decay as a function of delay time according to the Stejskal-Tanner equation (eq. 1),<sup>3-4</sup> where  $\gamma$  is the gyromagnetic ratio,  $g$  is gradient strength,  $d$  and  $\Delta$  are delays and  $D$  is the diffusion constant. The resulting diffusion constants are reported units of m<sup>2</sup> sec<sup>-1</sup> using the Bruker TopSpin 3.0 software package.

$$I = I_0 e^{- (\gamma g \delta)^2 D (\Delta - \frac{\delta}{3})} \quad \text{Eq 1.}$$

Hydrodynamic radii ( $r_h$ ) were calculated from the diffusion constants using the Stokes-Einstein equation (equation 2), where  $k_B$  is Boltzmann's constant, and  $\eta$  is the solvent viscosity. These  $r_h$  values are reported in Table 2. This derivation assumes spherical particles that are larger than the solvent molecules. Systematic errors in the calculated radii can be reasonably assumed to be similar for this set of 8 complexes given their similar solid-state structures and chemical constitution.

$$r_h = \frac{k_B T}{6\pi\eta D} \quad \text{Eq 2.}$$



IR (diamond ATR) of L-H<sub>2</sub>Ph1

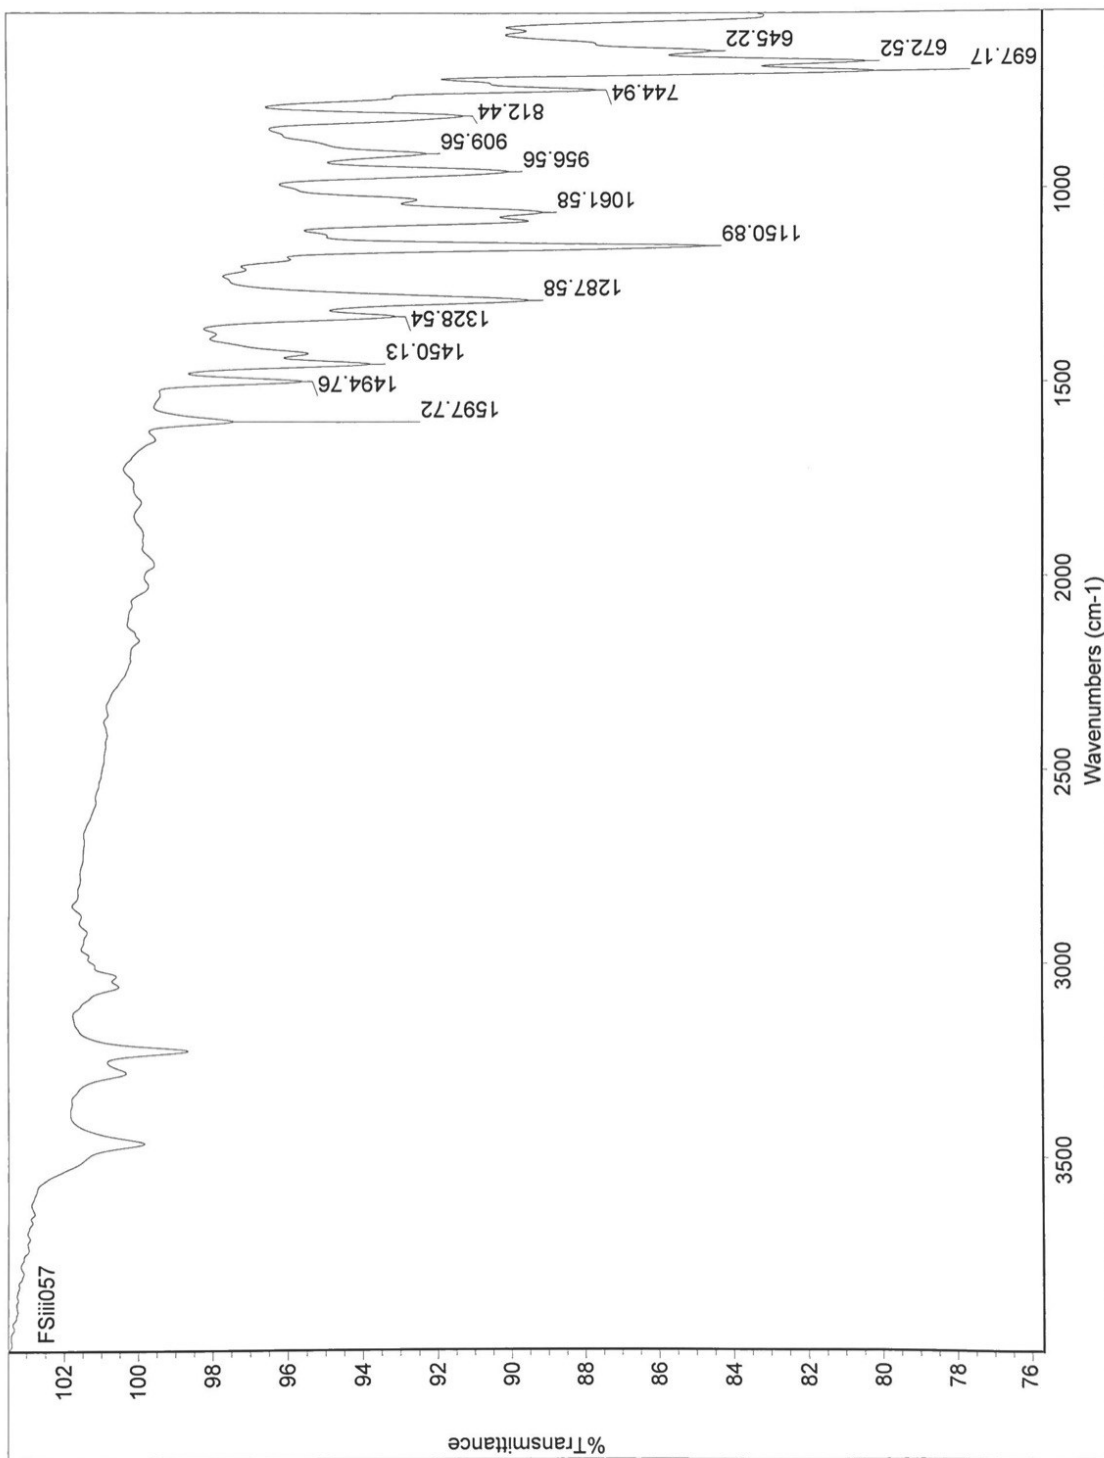





<sup>19</sup>F NMR (376 MHz, CDCl<sub>3</sub>) of L-H<sub>2</sub>Ph<sub>2</sub>

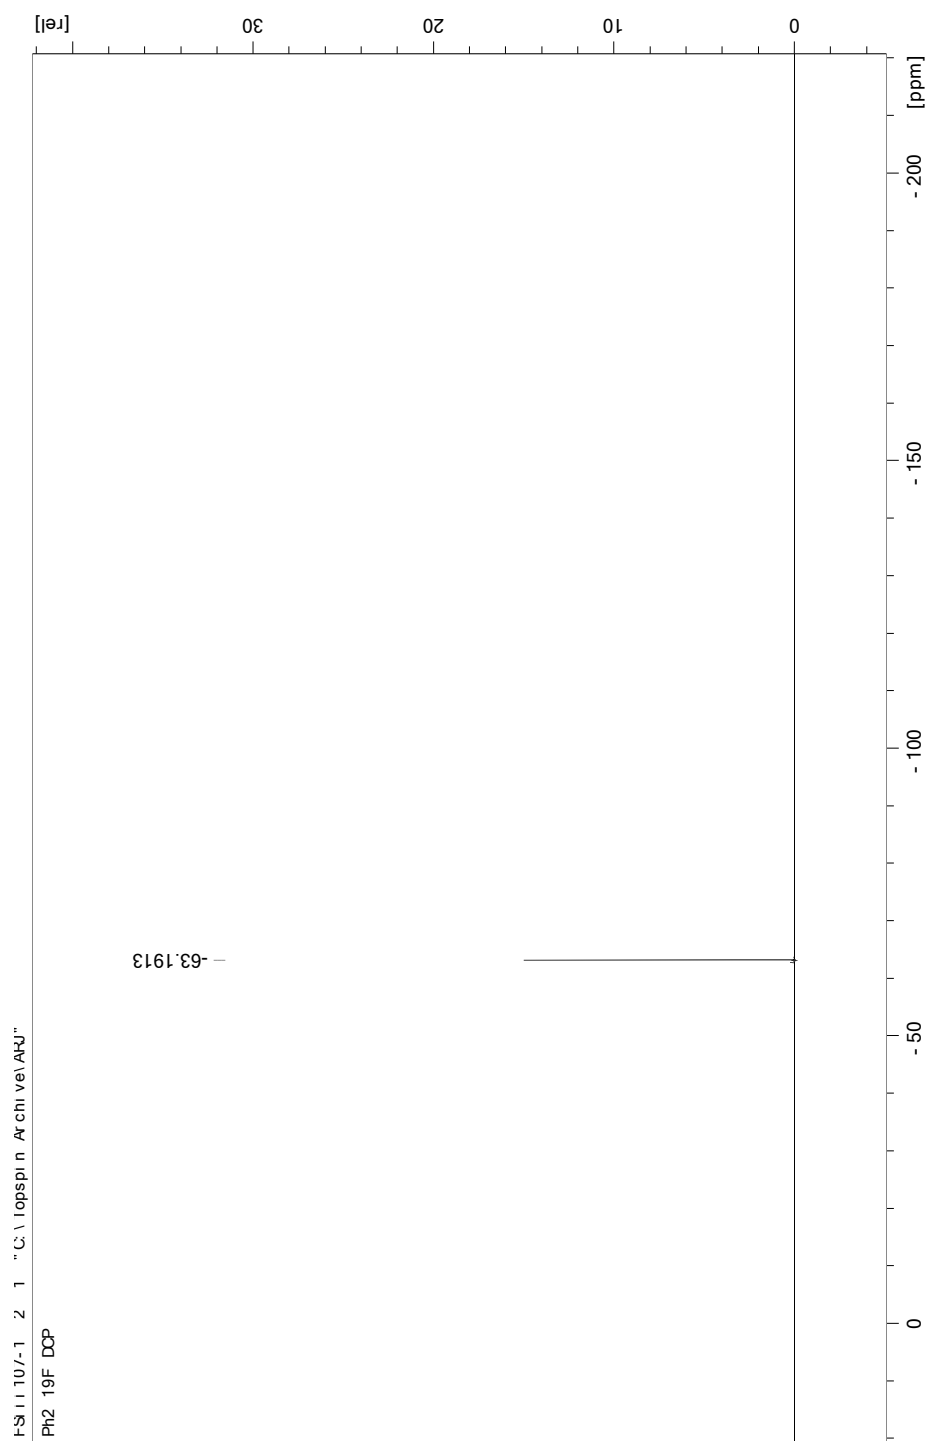

Chiral contact shift  $^1\text{H}$  NMR experiment (400 MHz,  $\text{CDCl}_3$ ) for D- and L- $\text{H}_2\text{Ph}_2$

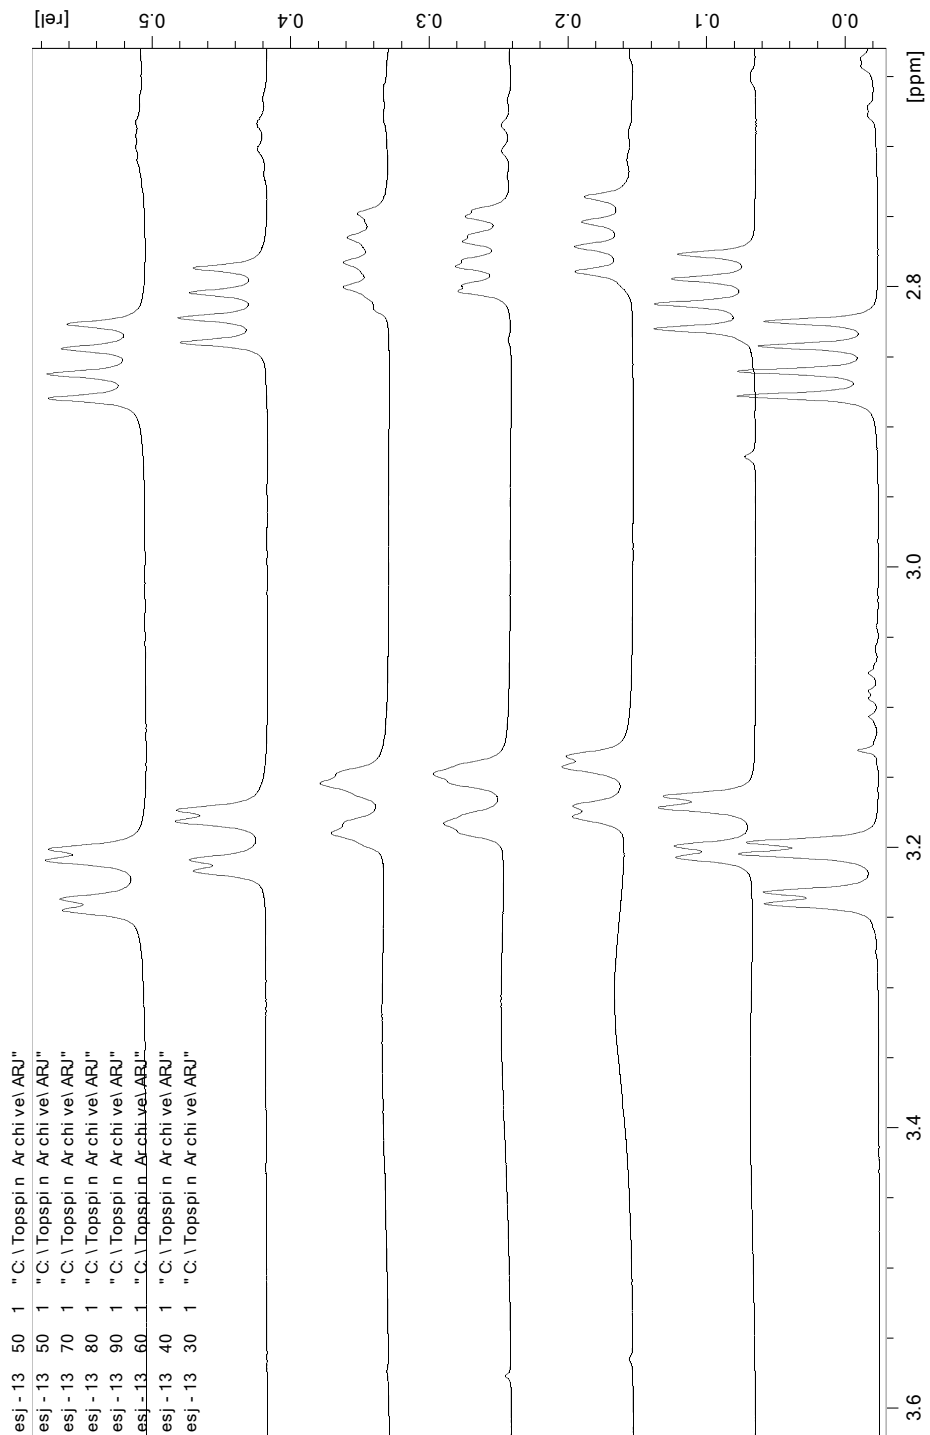

IR (diamond ATR) of L-H<sub>2</sub>Ph<sub>2</sub>

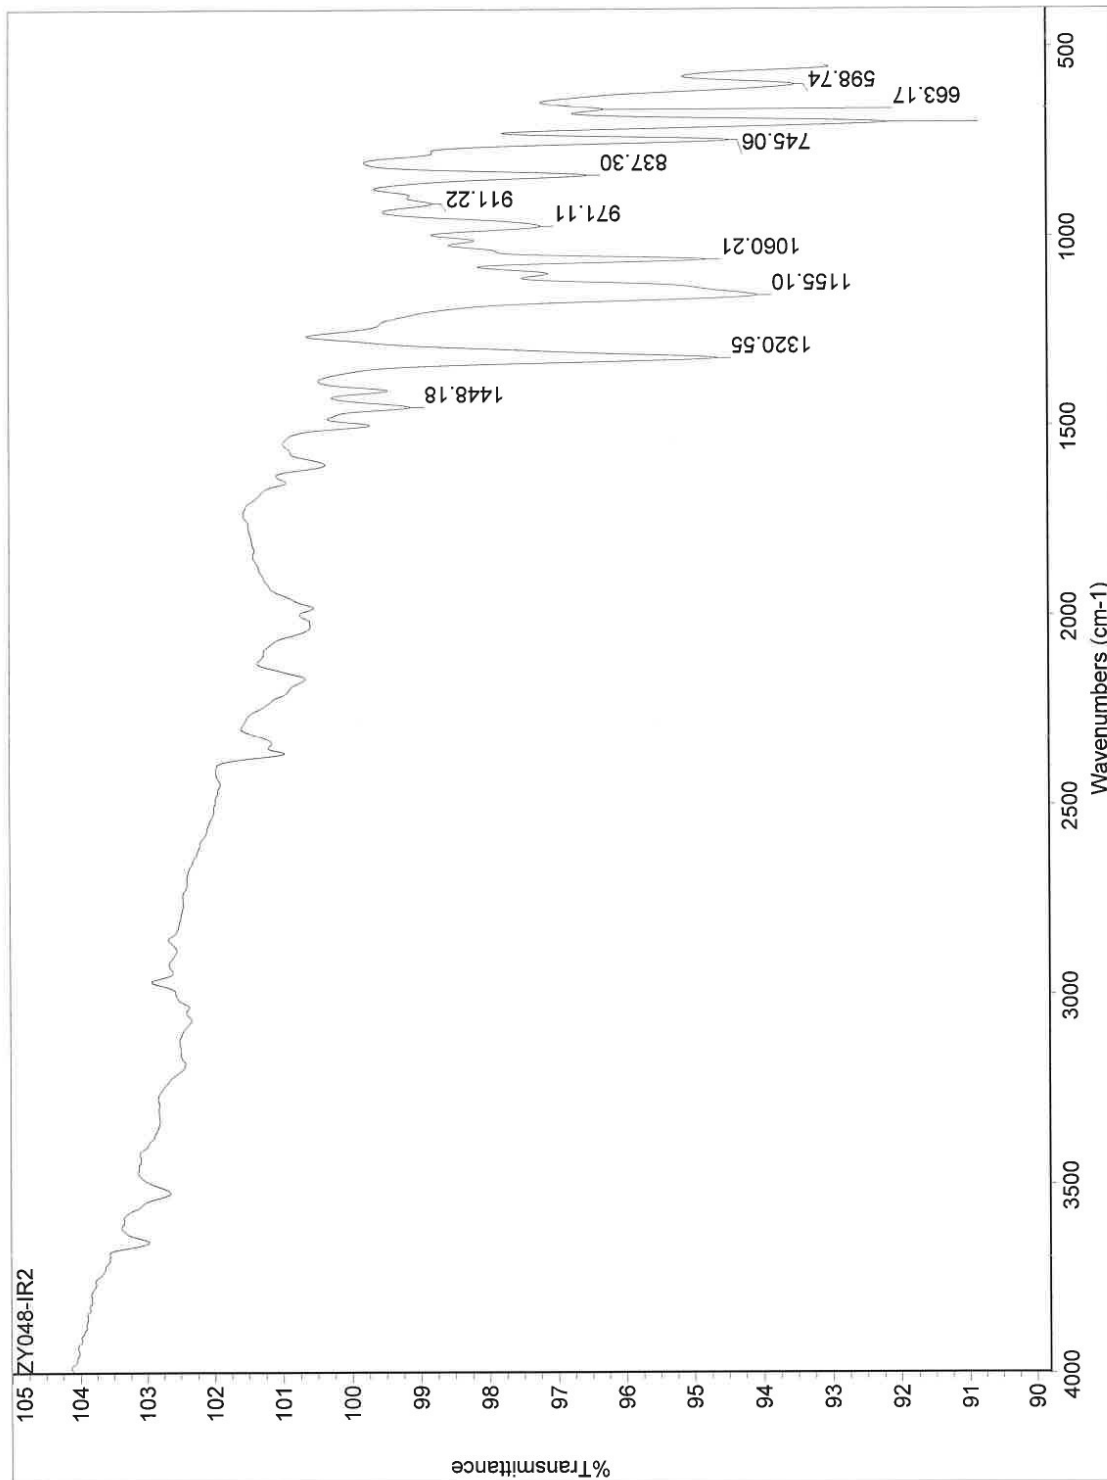

$^1\text{H}$  NMR (400 MHz,  $\text{CDCl}_3$ ) of L-H<sub>2</sub>Ph<sub>3</sub>

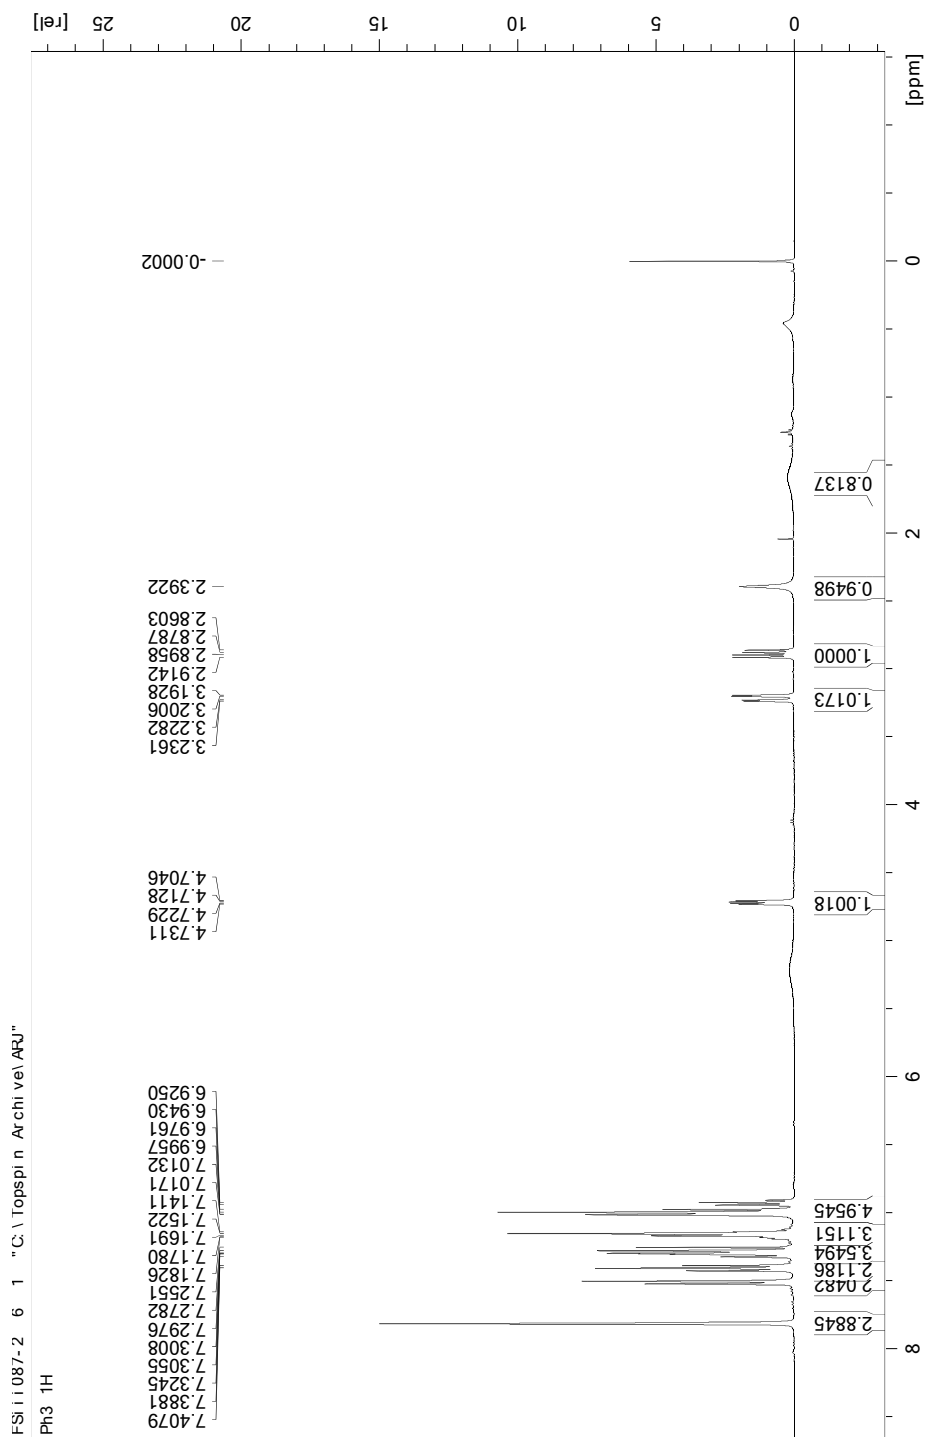

$^{13}\text{C}$  NMR (100 MHz,  $\text{CDCl}_3$ ) of L-H<sub>2</sub>Ph<sub>3</sub>

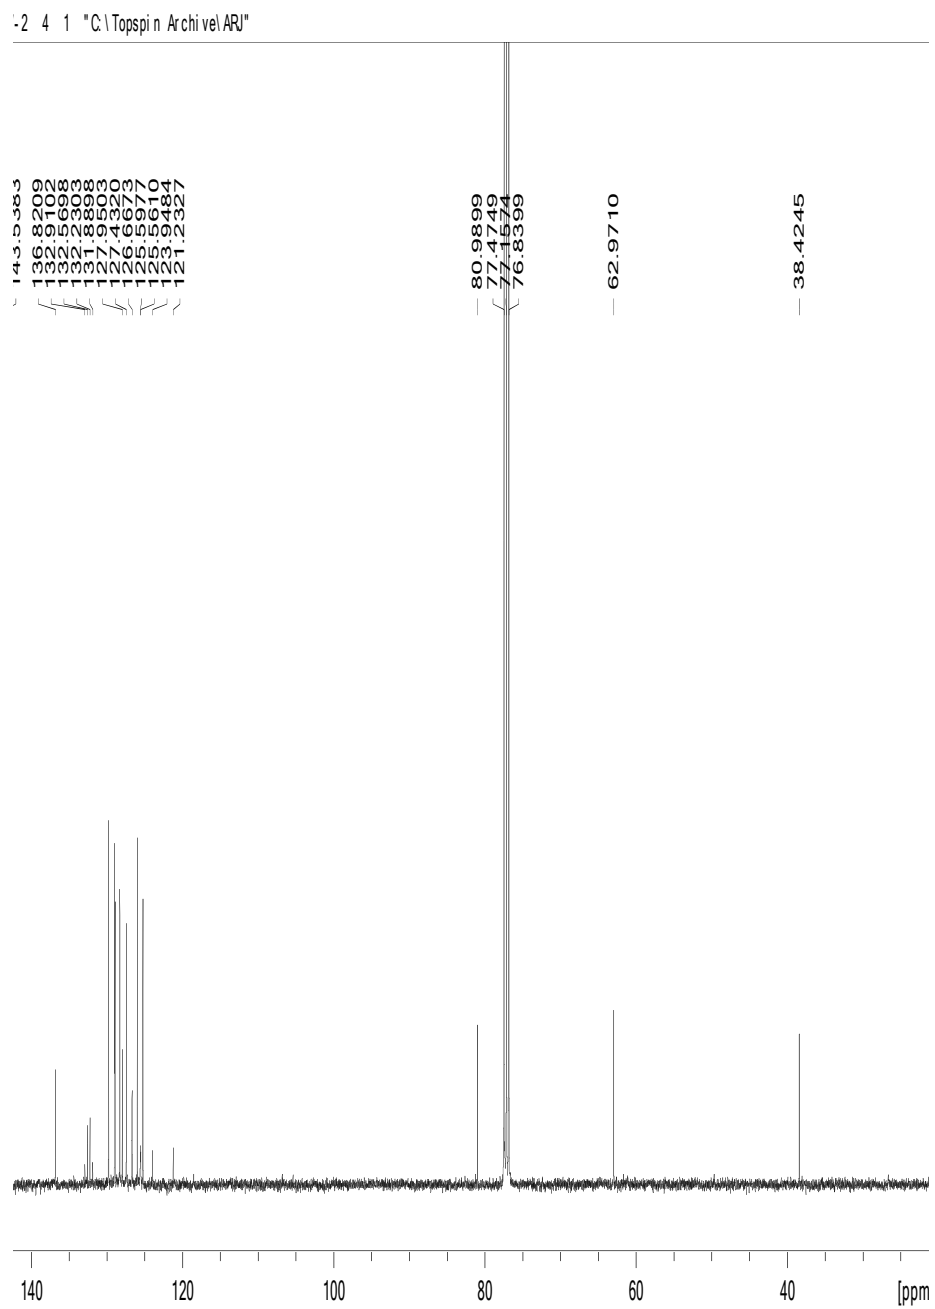



<sup>19</sup>F NMR (376 MHz, CDCl<sub>3</sub>) of L-H<sub>2</sub>Ph<sub>3</sub>

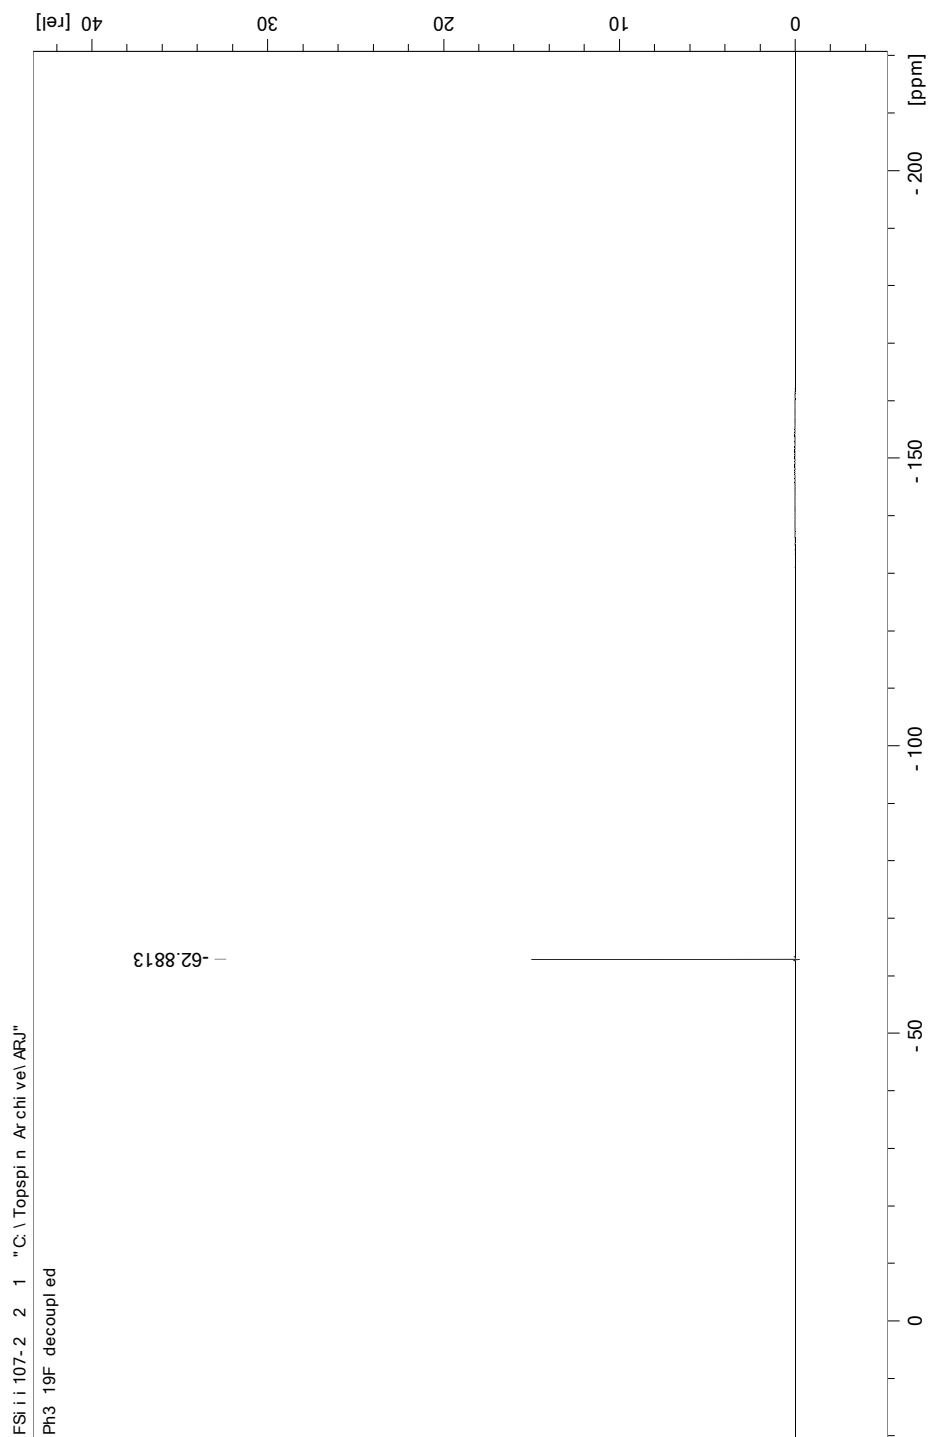

Chiral contact shift  $^1\text{H}$  NMR experiment (400 MHz,  $\text{CDCl}_3$ ) for D- and L- $\text{H}_2\text{Ph3}$

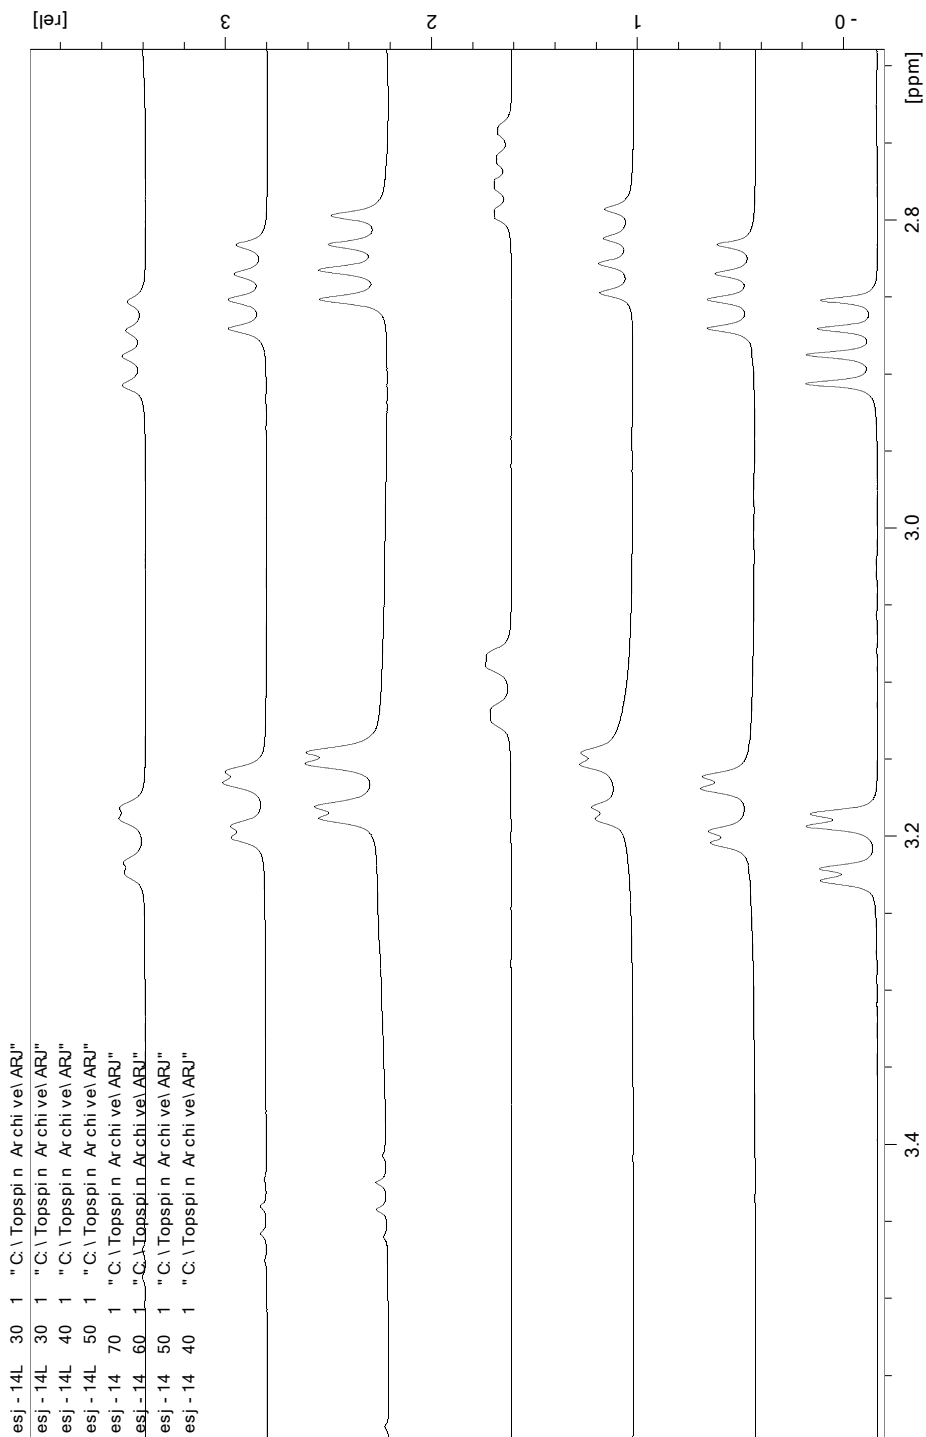

IR (diamond ATR) of L-H<sub>2</sub>Ph<sub>3</sub>

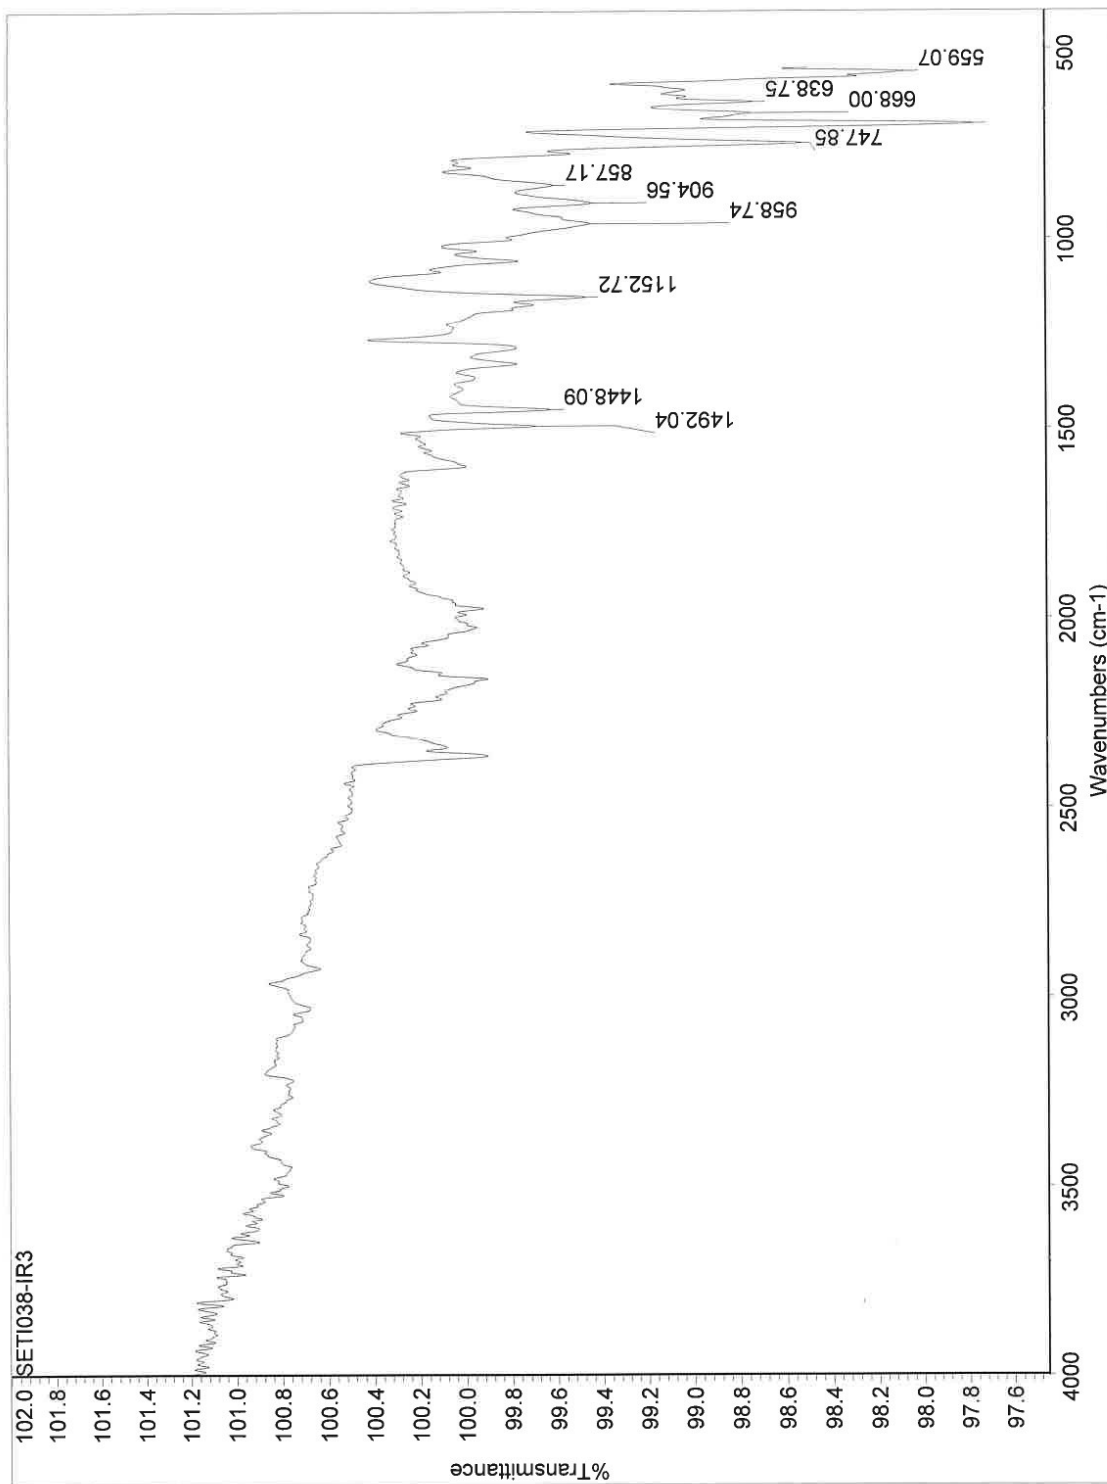

$^1\text{H}$  NMR (400 MHz,  $\text{CDCl}_3$ ) of L-H<sub>2</sub>Ph<sub>4</sub>

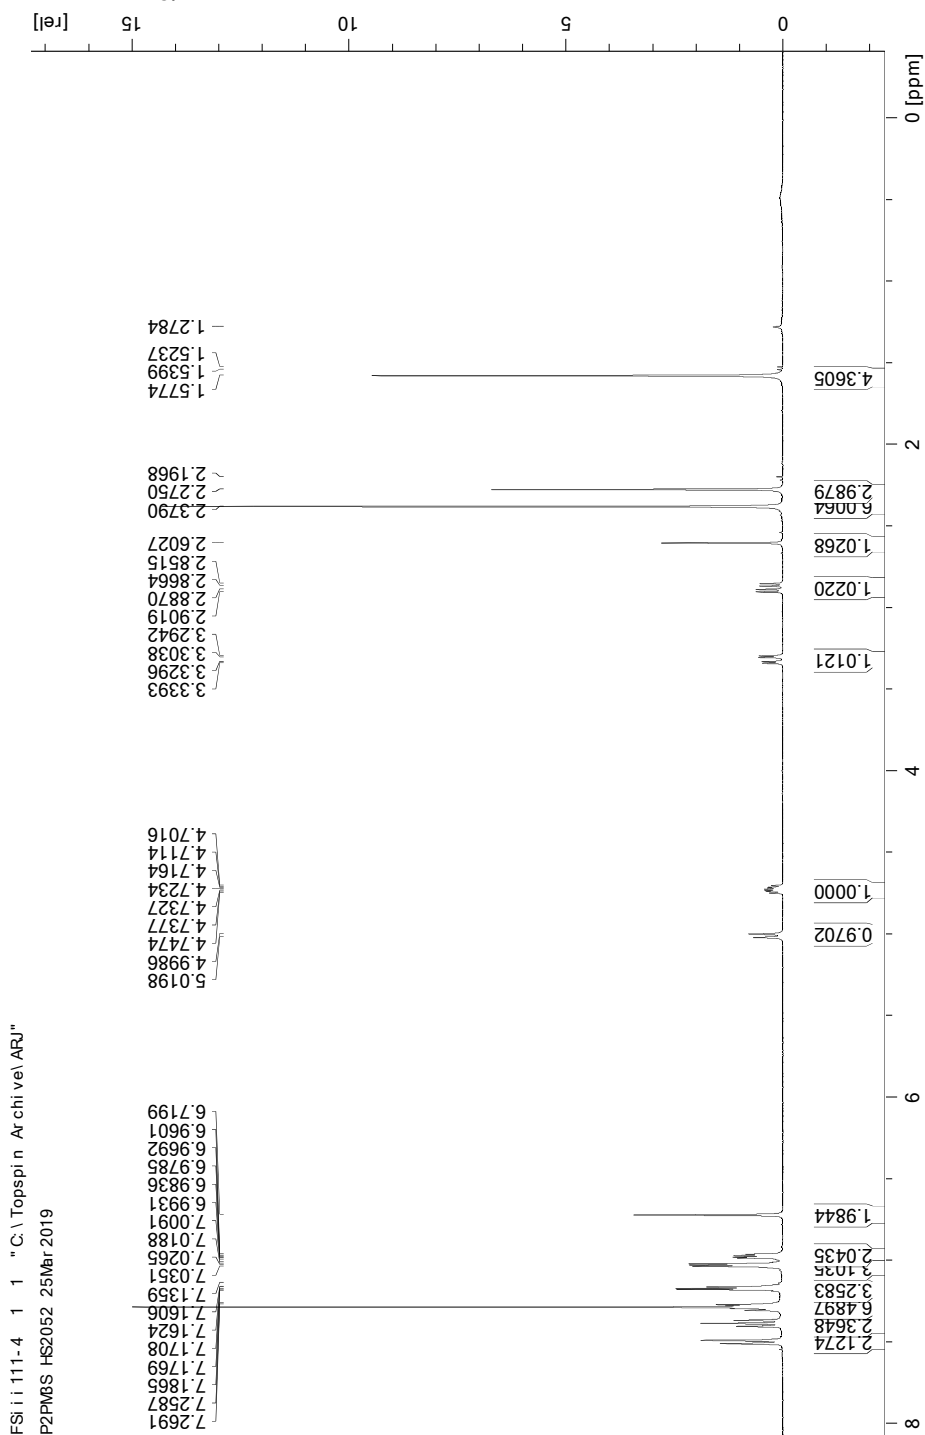

FSI ii 111-4 1 "C:\Topspin\Archivel\ARJ"  
P2PMBS HS2052 25Mar 2019

$^{13}\text{C}$  NMR (100 MHz,  $\text{CDCl}_3$ ) of L-H<sub>2</sub>Ph<sub>4</sub>

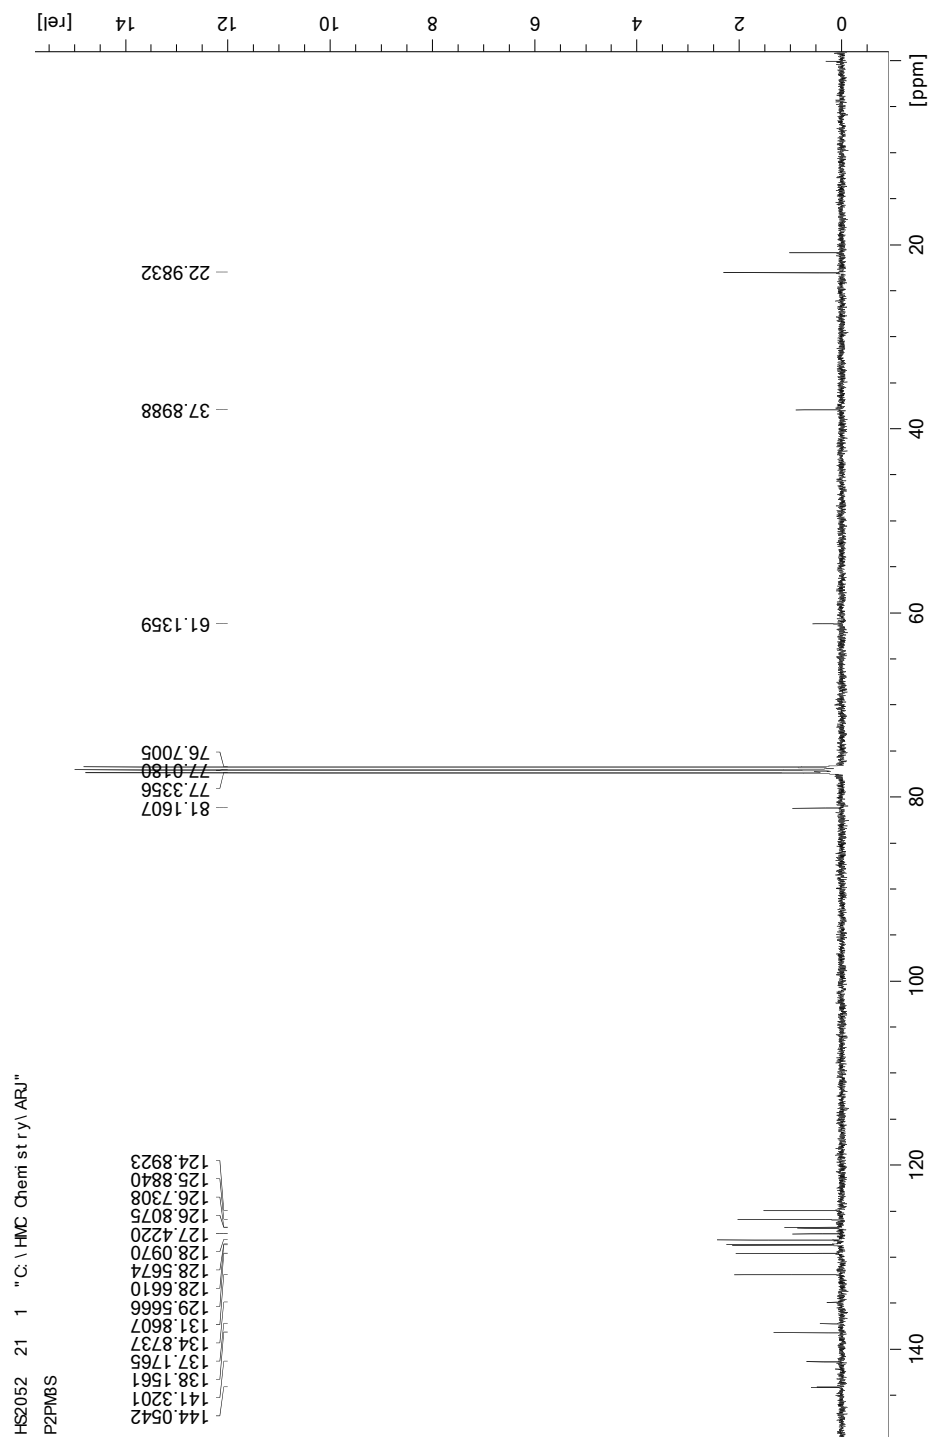

IR (diamond ATR) of L-H<sub>2</sub>Ph4

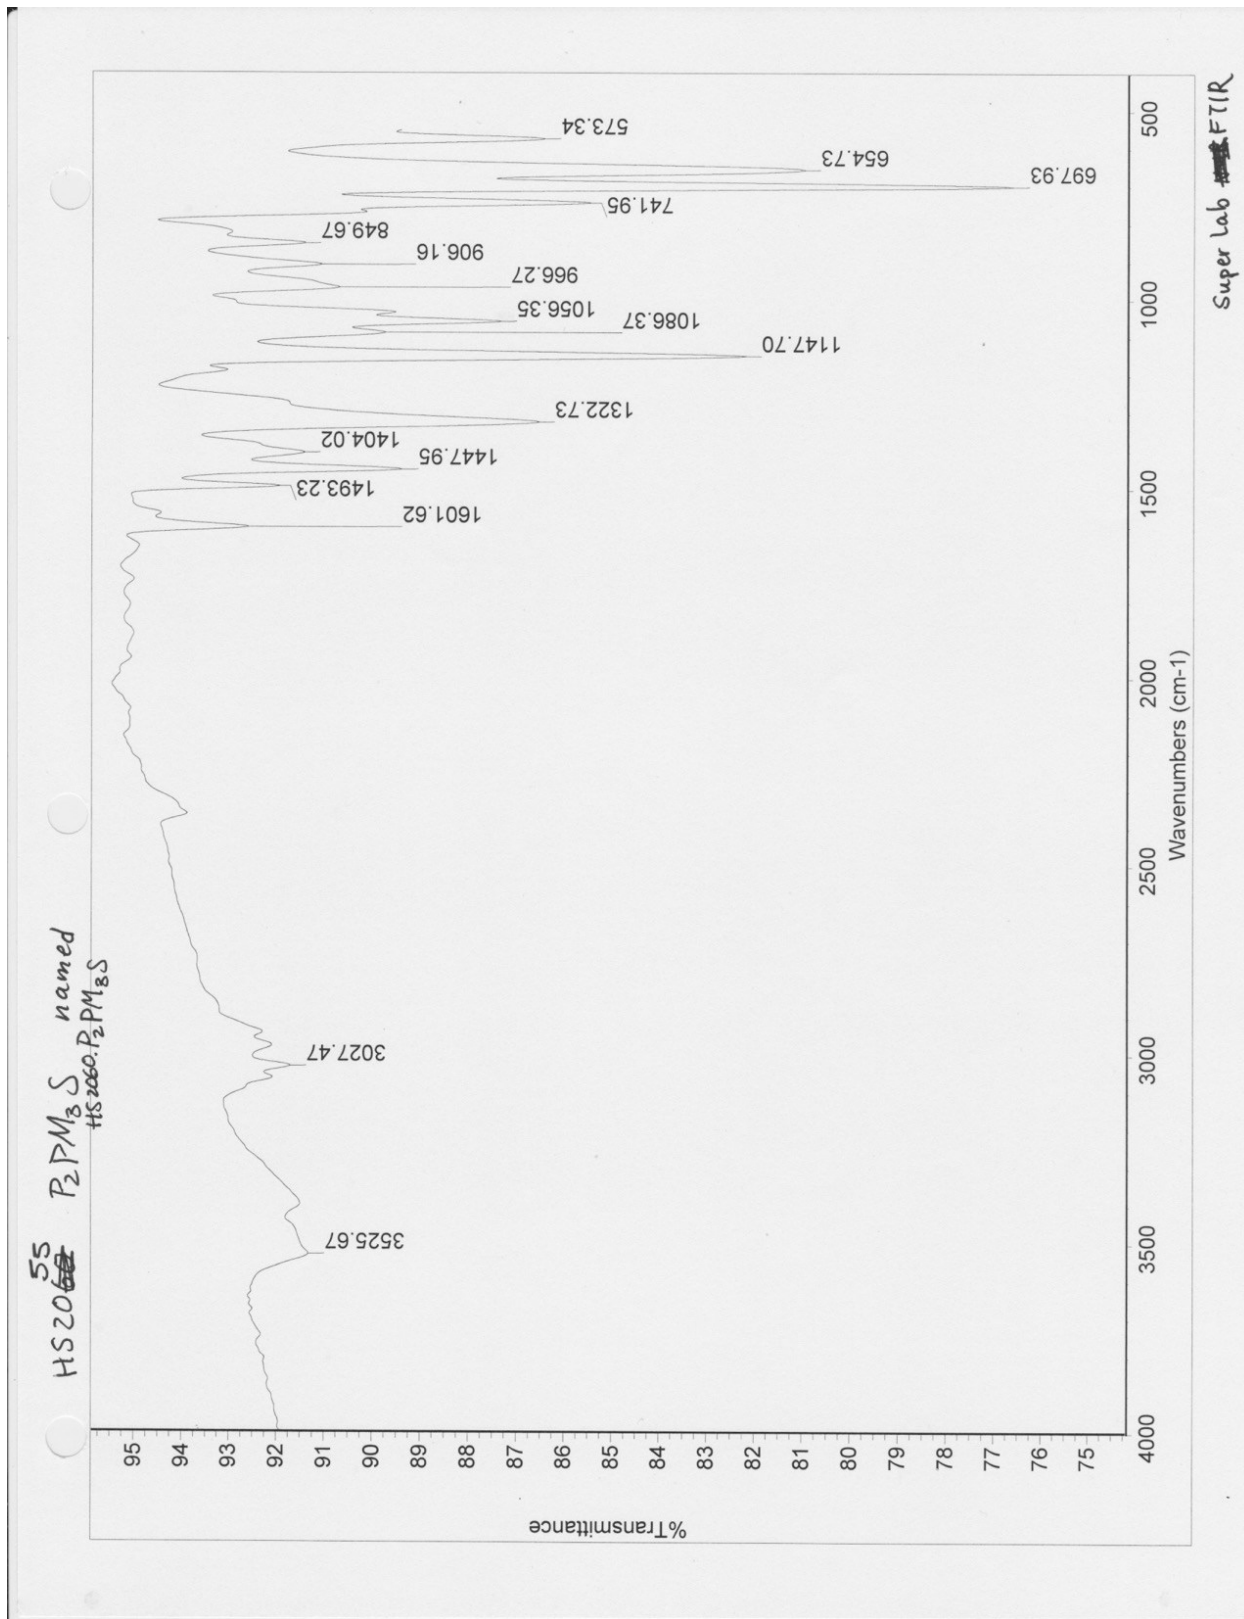

$^1\text{H}$  NMR (400 MHz,  $\text{C}_6\text{D}_6$ ) of **TiPh**

Solvent peaks at 4.28 ( $\text{CH}_2\text{Cl}_2$ ) 3.2 and 1.1 ( $\text{Et}_2\text{O}$ )

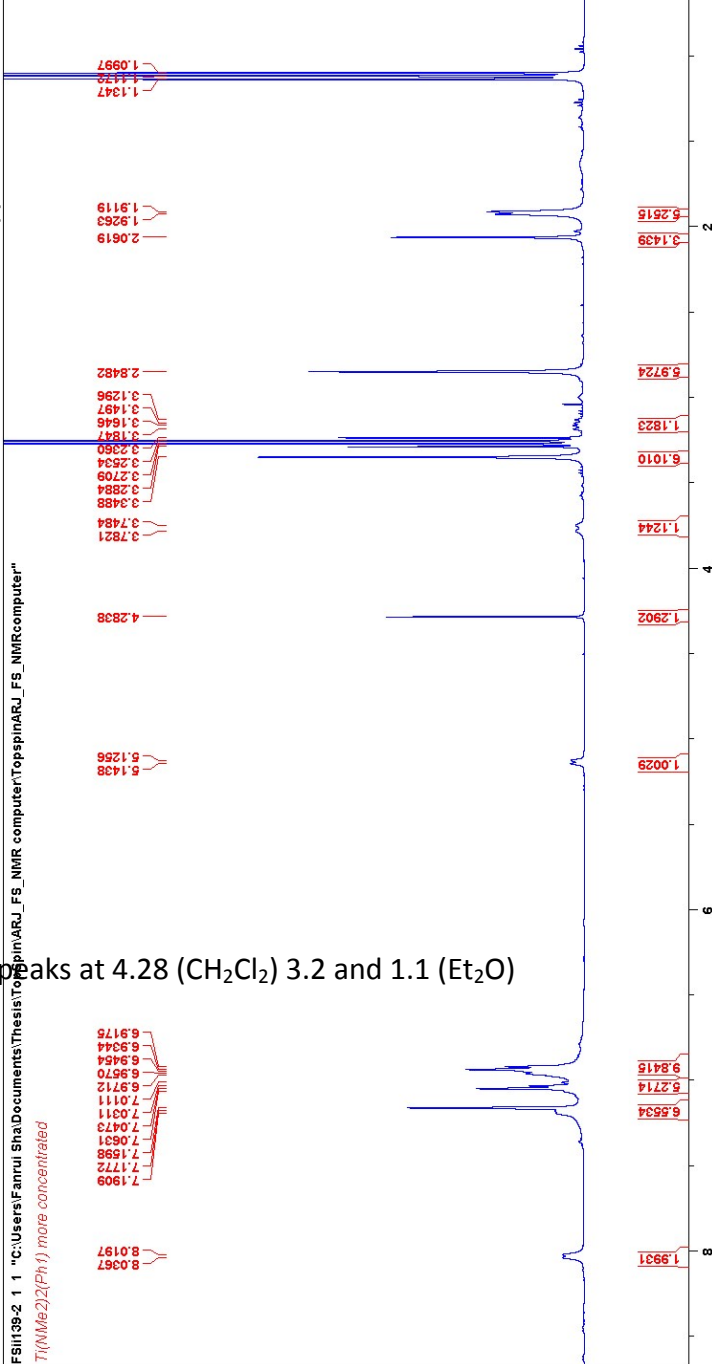

<sup>13</sup>C NMR (100 MHz, C<sub>6</sub>D<sub>6</sub>) of TiP

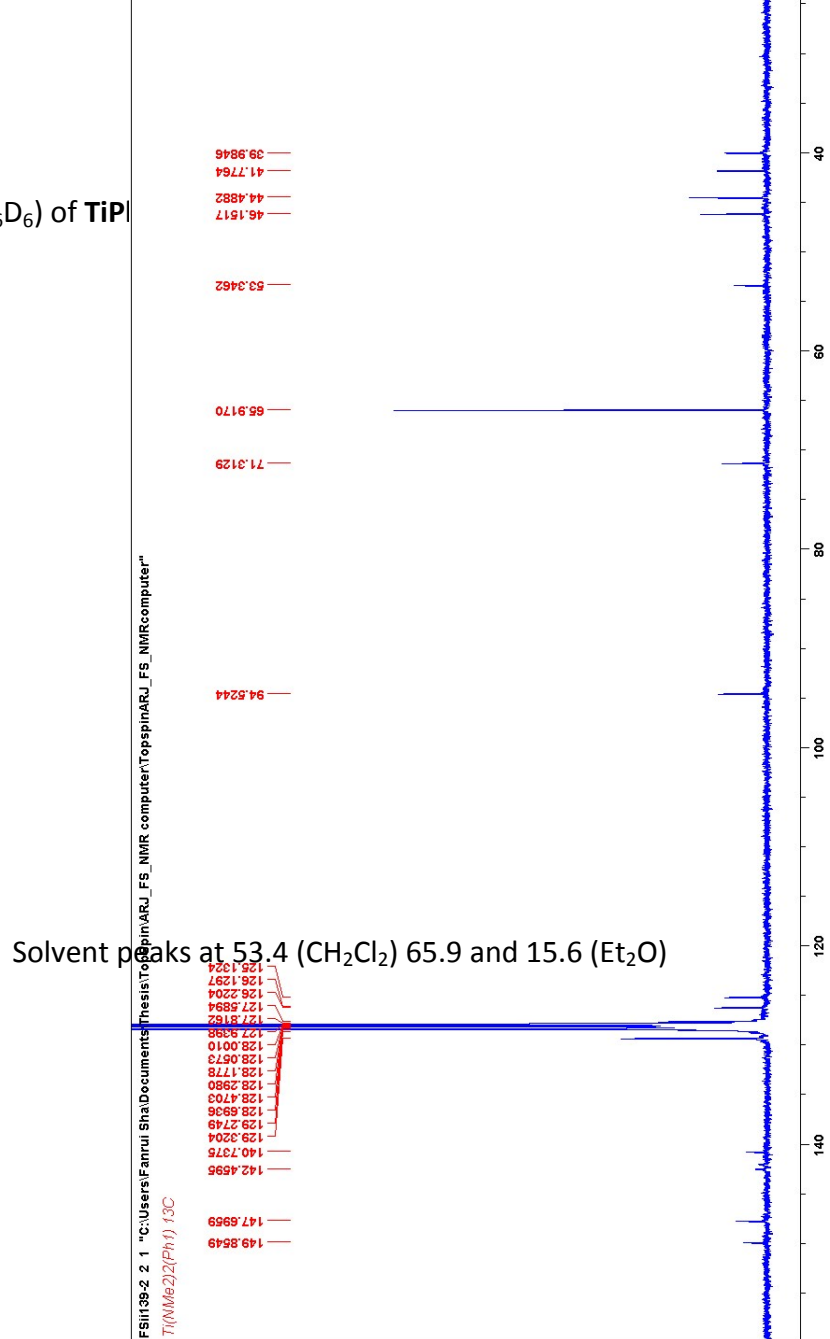



$^1\text{H}$  NMR (400 MHz,  $\text{C}_6\text{D}_6$ ) of **TiPh<sub>2</sub>** {Ti(Ph<sub>2</sub>)(NMe<sub>2</sub>)<sub>2</sub>}

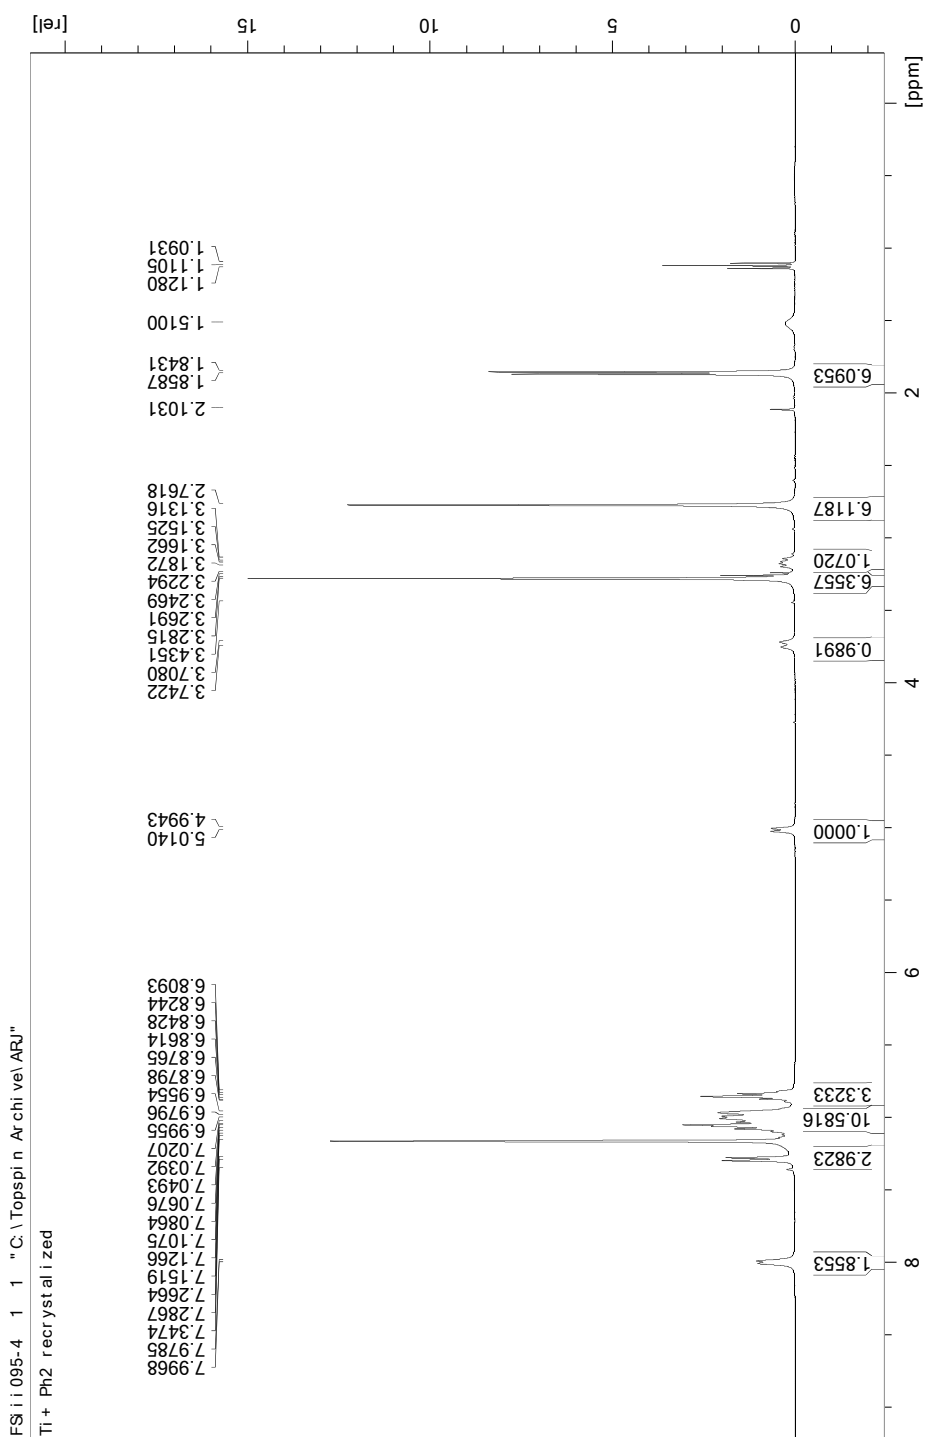

$^{13}\text{C}$  NMR (100 MHz,  $\text{C}_6\text{D}_6$ )

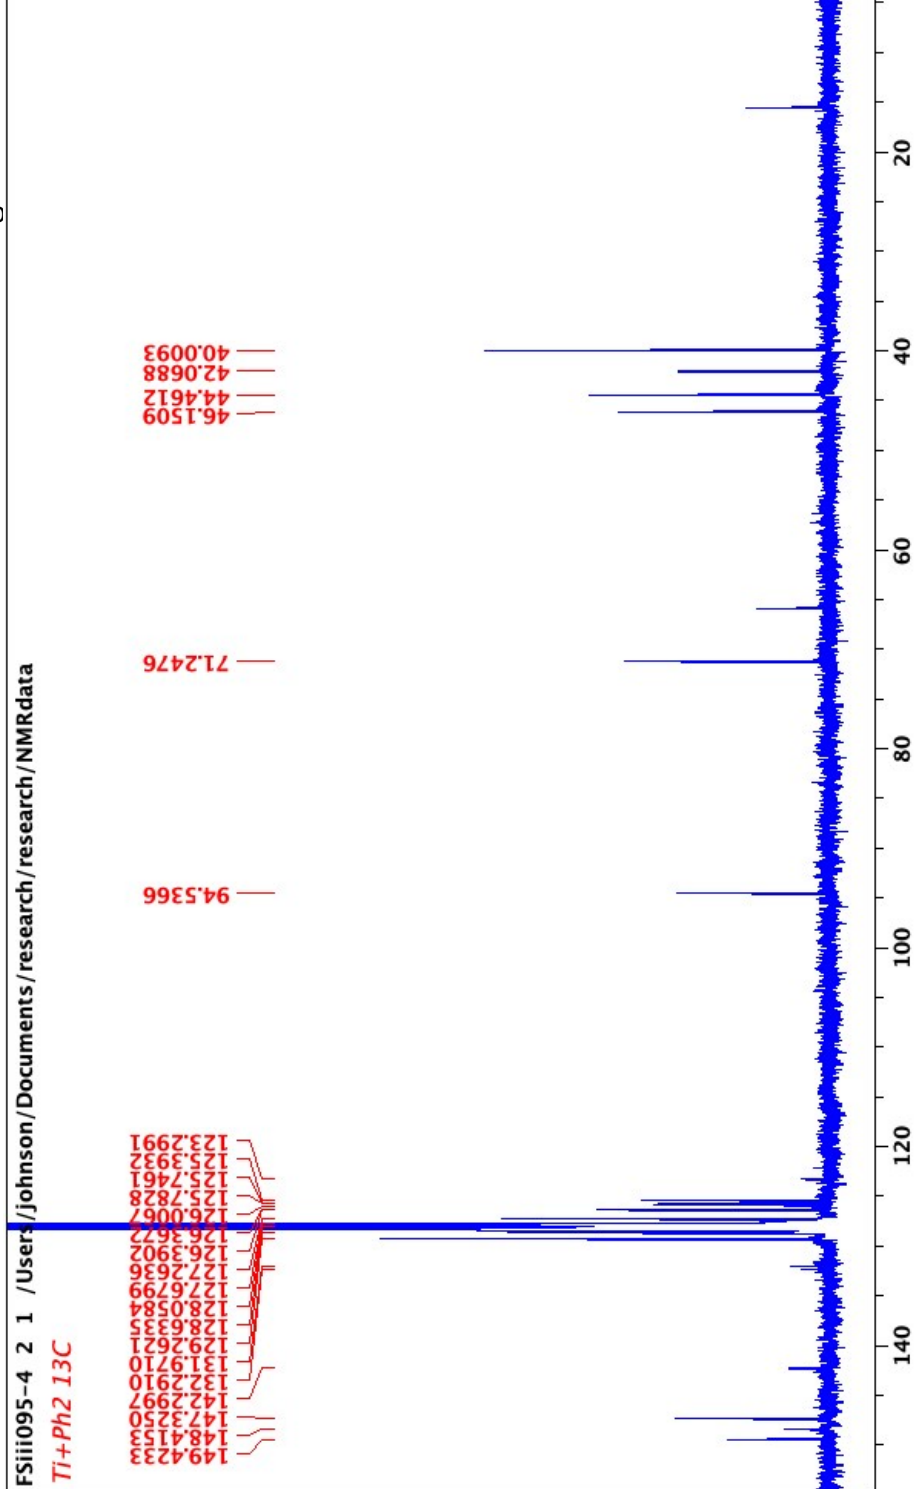

$^{19}\text{F}$  NMR (376 MHz,  $\text{C}_6\text{D}_6$ ) of **TiPh<sub>2</sub>** {Ti(Ph<sub>2</sub>)(NMe<sub>2</sub>)<sub>2</sub>}

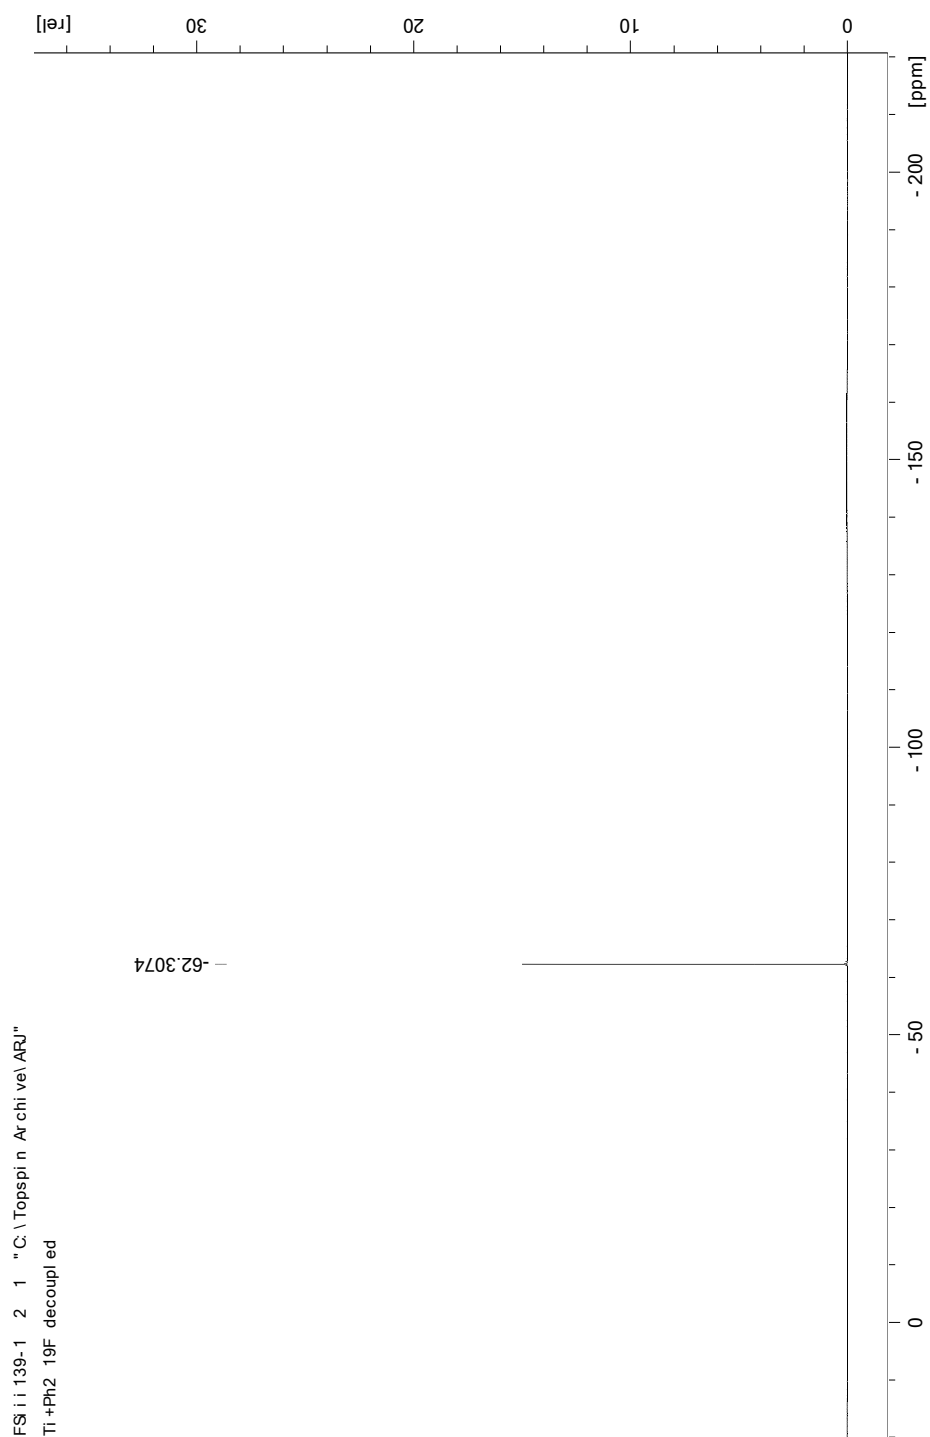

Crude  $^1\text{H}$  NMR (400 MHz,  $\text{C}_6\text{D}_6$ ) of **TiPh3**  $\{\text{Ti}(\text{Ph}_3)(\text{NMe}_2)_2(\text{HNMe}_2)\}$

ii 097-1 1 1 "C:\Topspi n Archive\ARJ"

$\text{NMe}_2$ (Ph3) solid crude

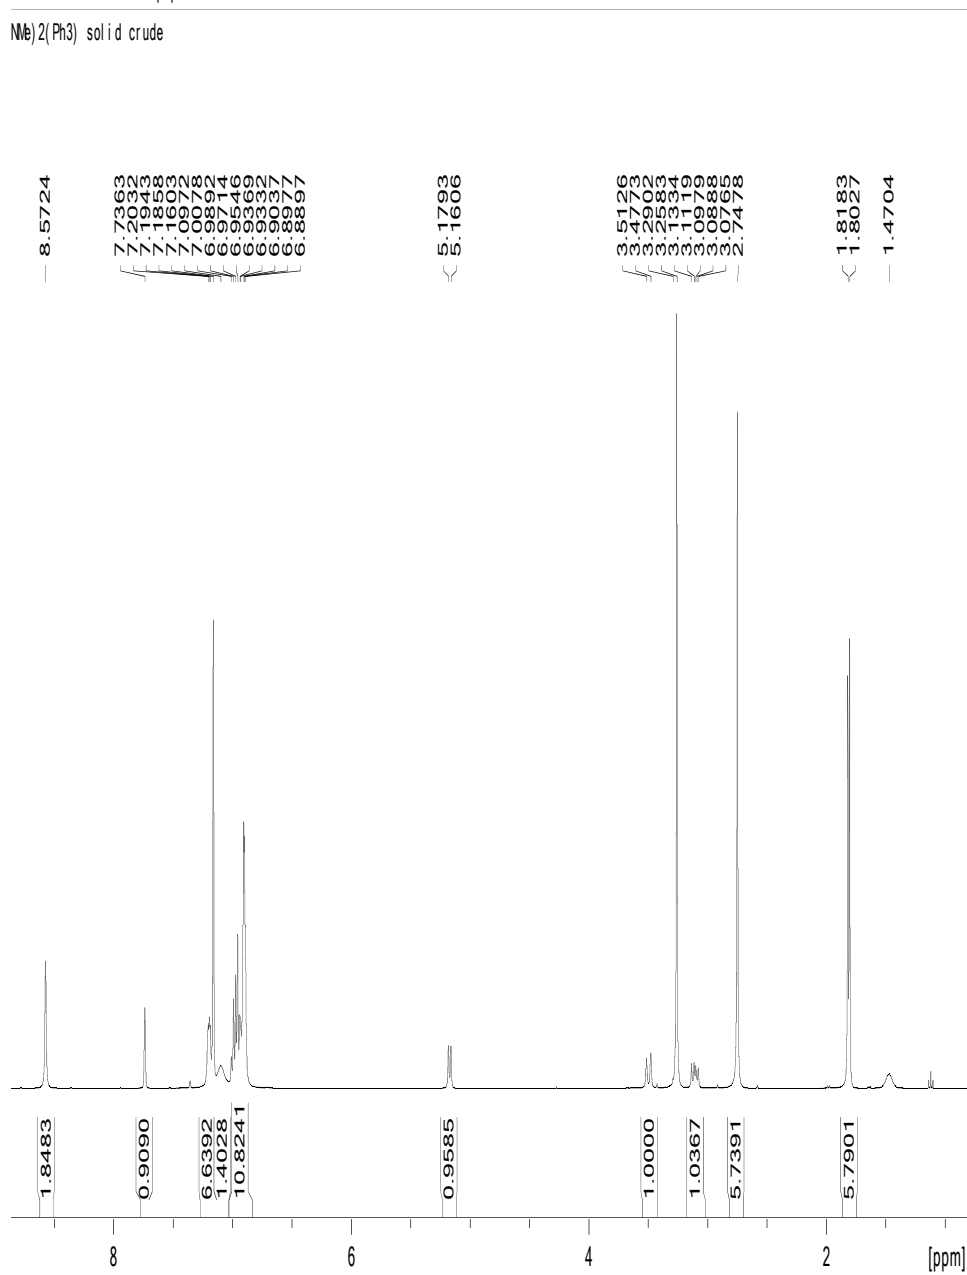

$^1\text{H}$  NMR (400 MHz,  $\text{C}_6\text{D}_6$ )  $\delta$

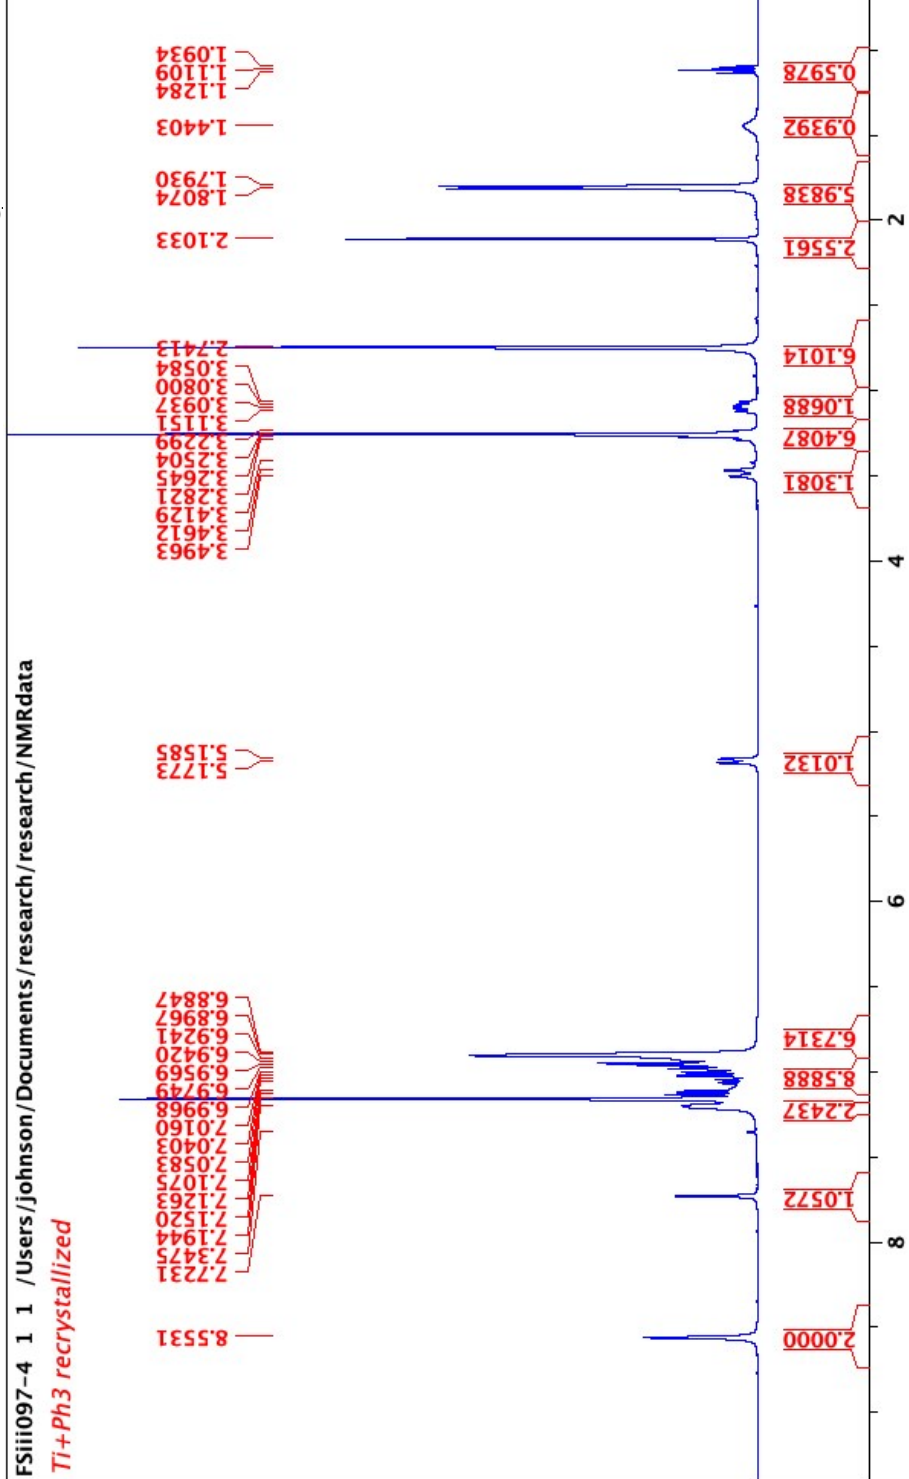

<sup>13</sup>C NMR (100 MHz, C<sub>6</sub>D<sub>6</sub>) of **TiPh<sub>3</sub>·C<sub>7</sub>H<sub>8</sub>** {Ti(Ph<sub>3</sub>)(NMe<sub>2</sub>)<sub>2</sub>(HNMe<sub>2</sub>)·C<sub>7</sub>H<sub>8</sub>}

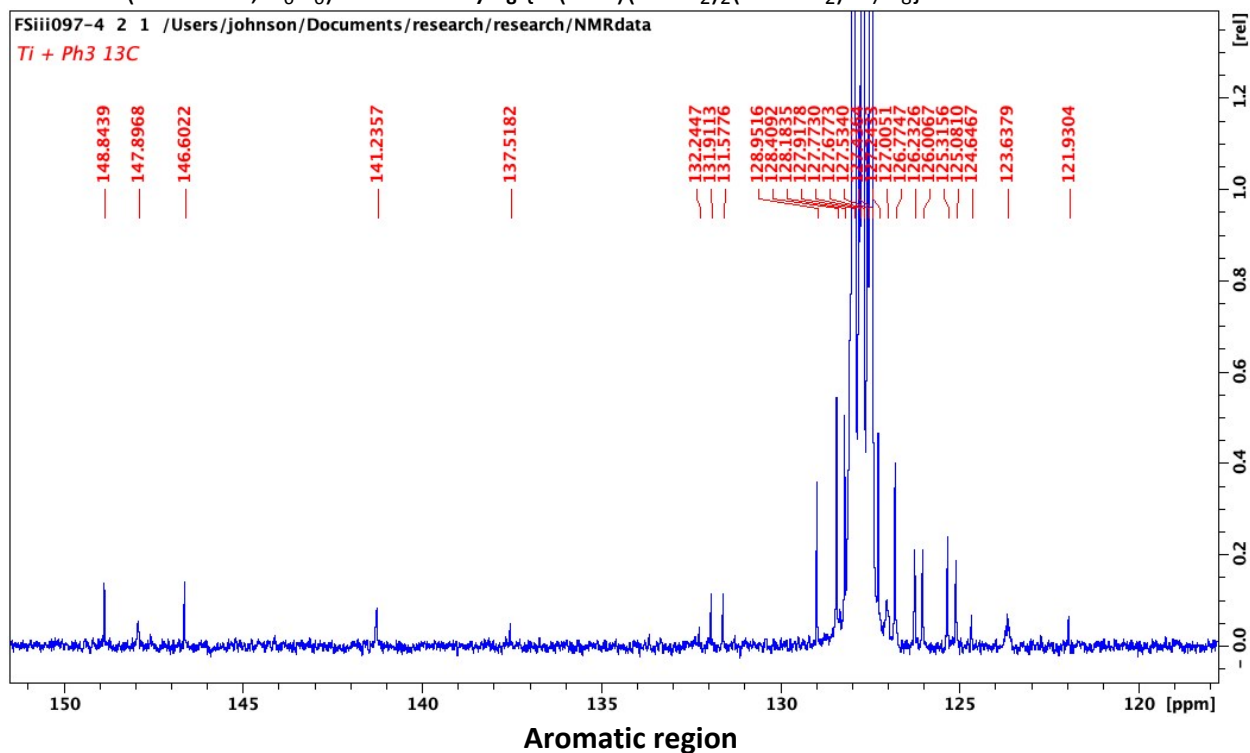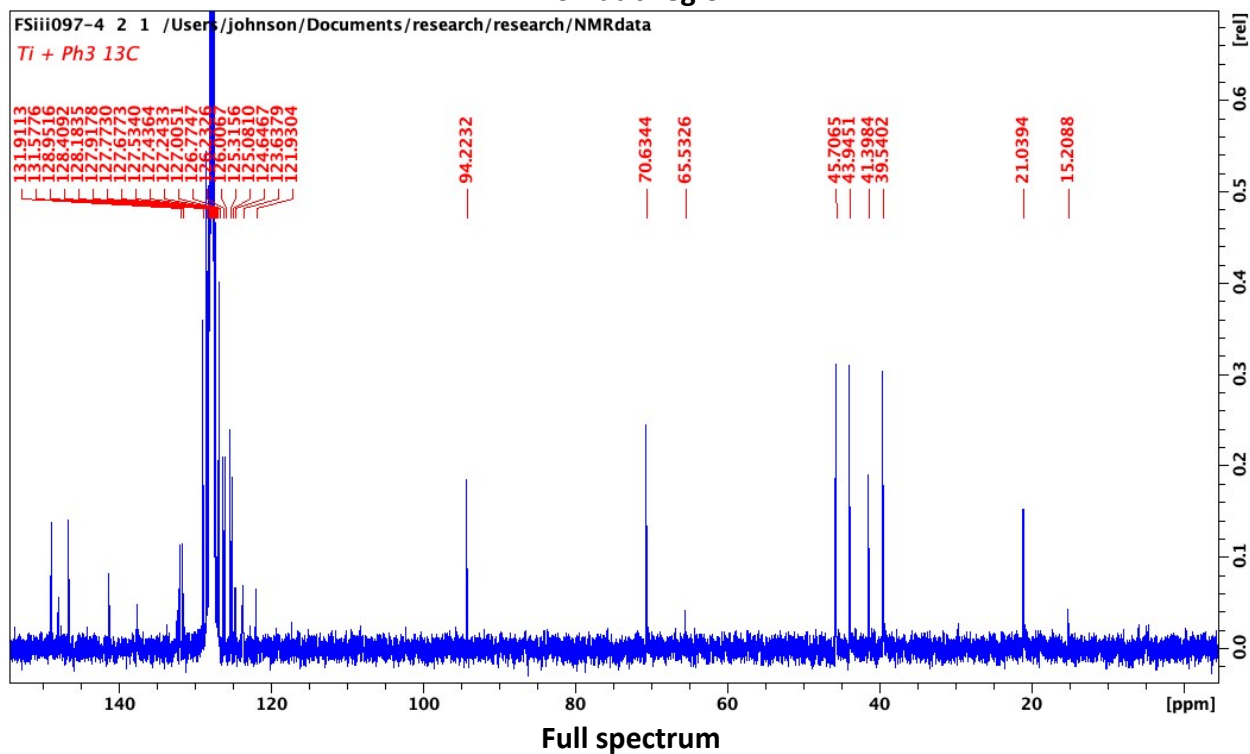

Solvent peaks at 53.4 (CH<sub>2</sub>Cl<sub>2</sub>) 65.5 and 15.2 (Et<sub>2</sub>O)

$^{19}\text{F}$  NMR (376 MHz,  $\text{C}_6\text{D}_6$ ) of  $\text{TiPh}_3\cdot\text{C}_7\text{H}_8$  { $\text{Ti}(\text{Ph}_3)(\text{NMe}_2)_2(\text{HNMe}_2)\cdot\text{C}_7\text{H}_8$ }

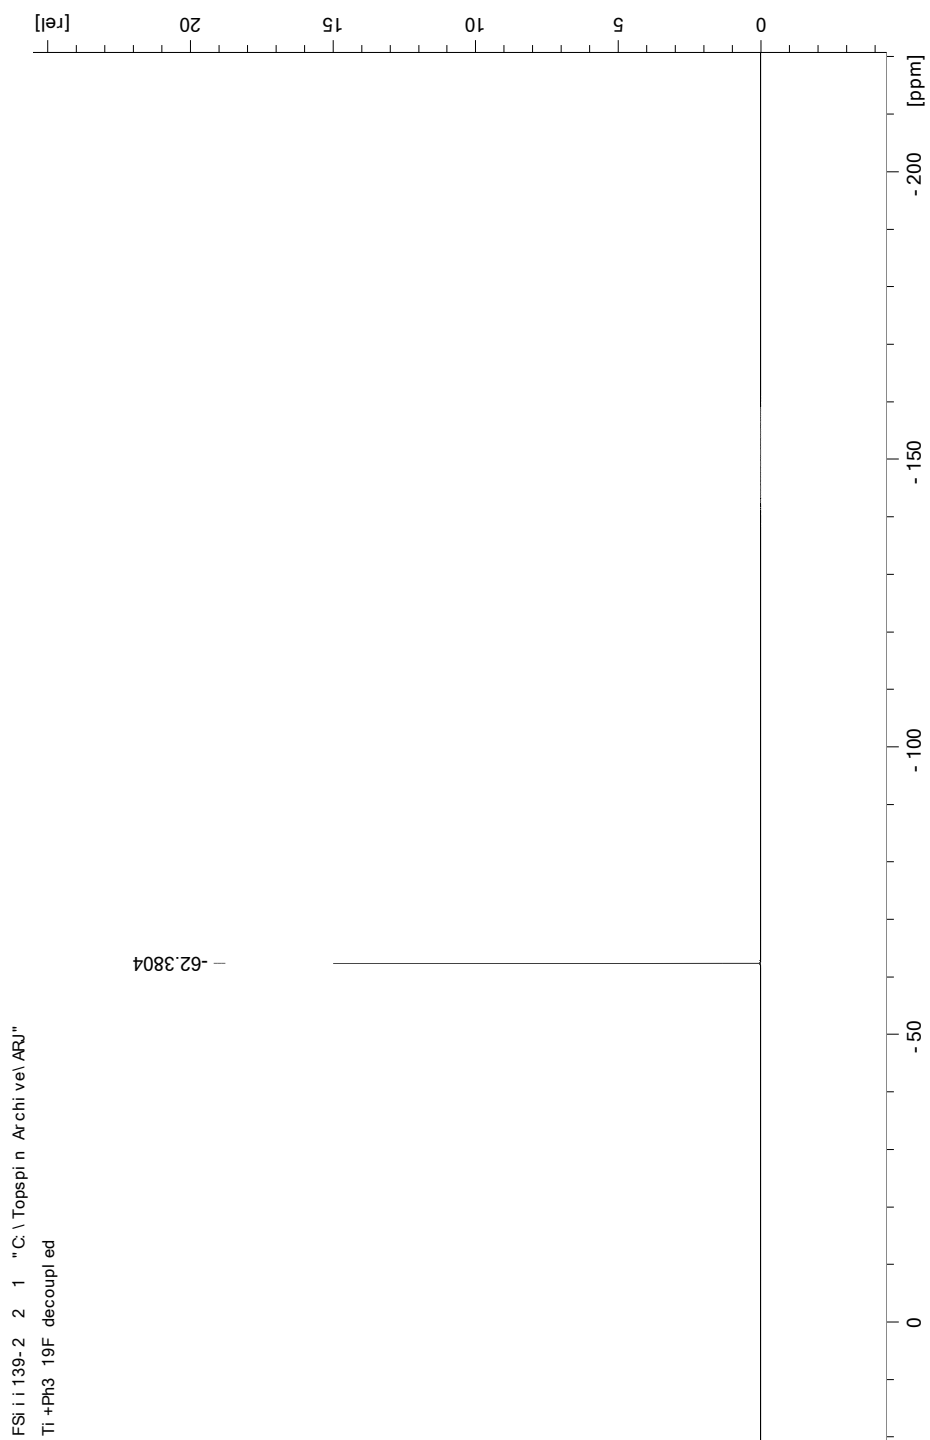

$^1\text{H}$  NMR (400 MHz,  $\text{C}_6$ )

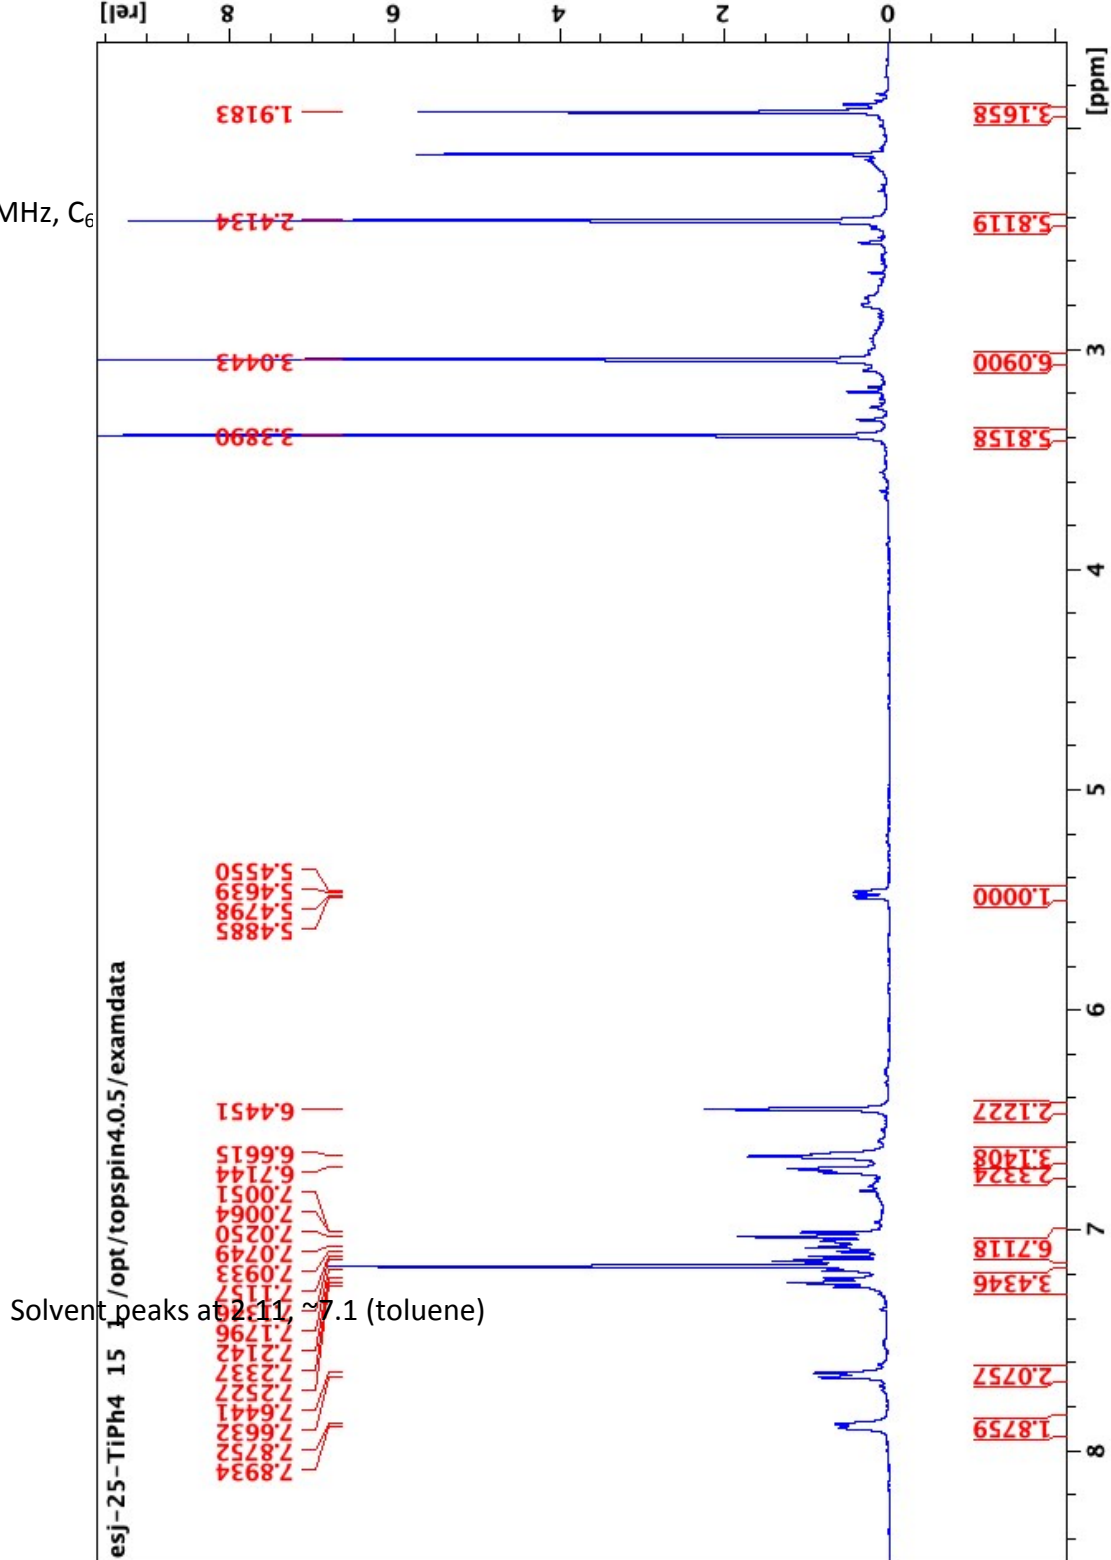



$^{13}\text{C}$  NMR (100 MHz,  $\text{C}_6\text{D}_6$ )

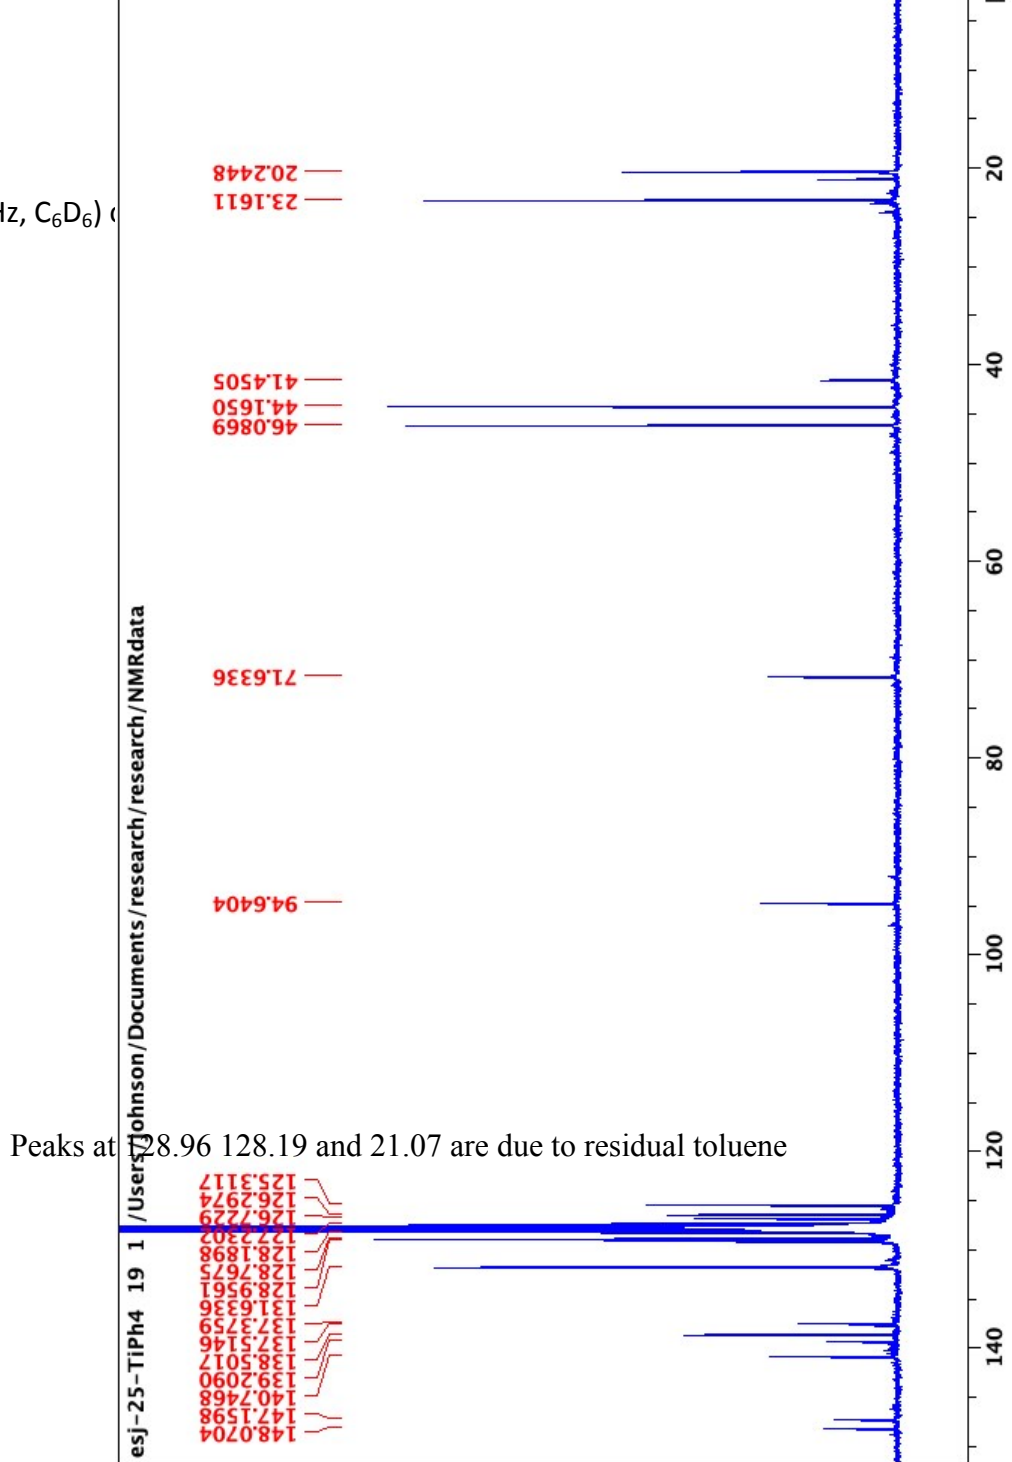



<sup>13</sup>C NMR (100 MHz, C<sub>6</sub>D<sub>6</sub>) of **TaPh1** {Ta(Ph1)(NMe<sub>2</sub>)<sub>3</sub>}

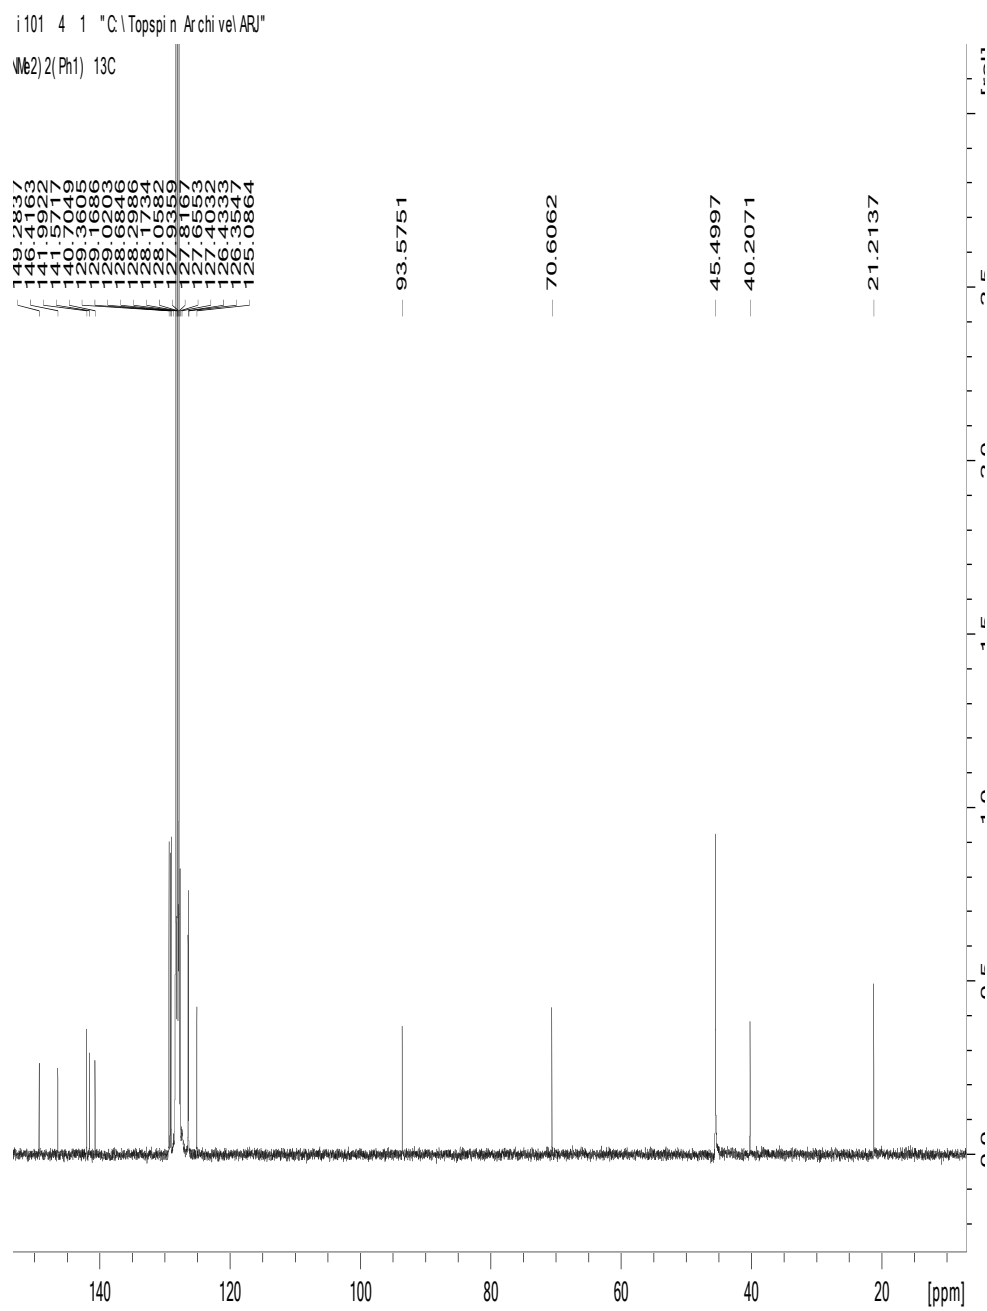



$^{13}\text{C}$  NMR (100 MHz,  $\text{C}_6\text{D}_6$ ) of **TaPh<sub>2</sub>** {Ta(Ph<sub>2</sub>)(NMe<sub>2</sub>)<sub>3</sub>}

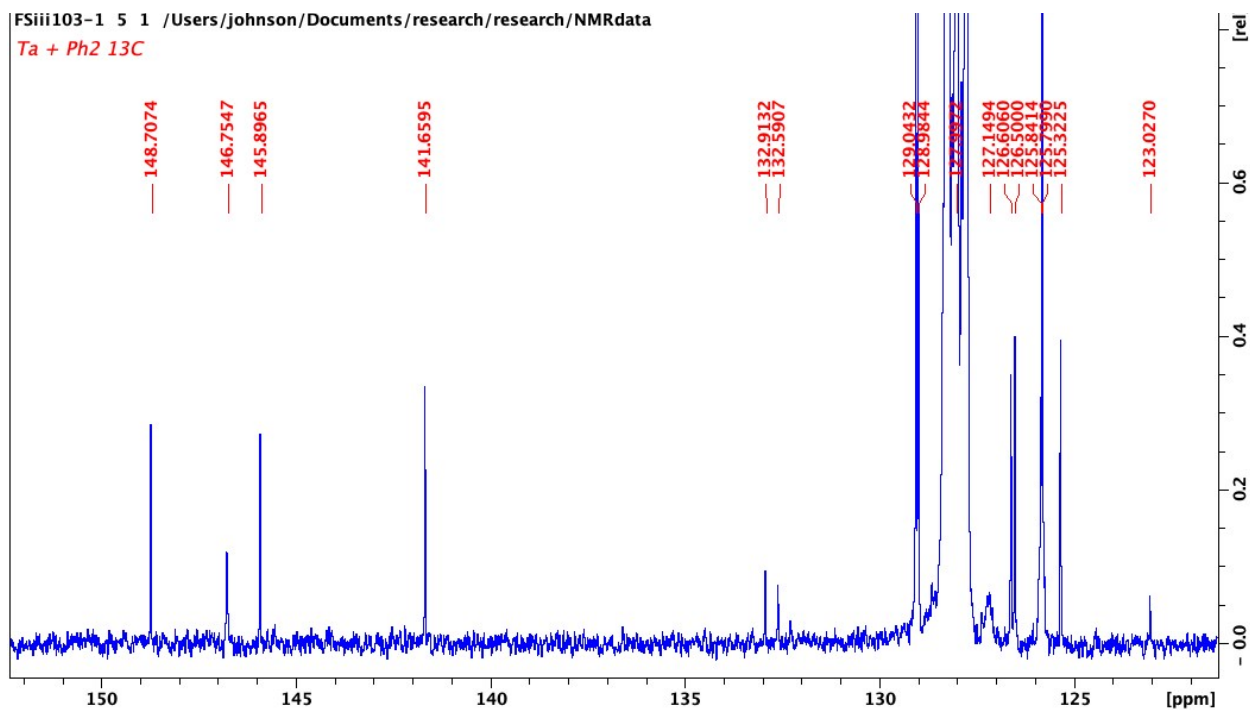

**Aromatic Region**

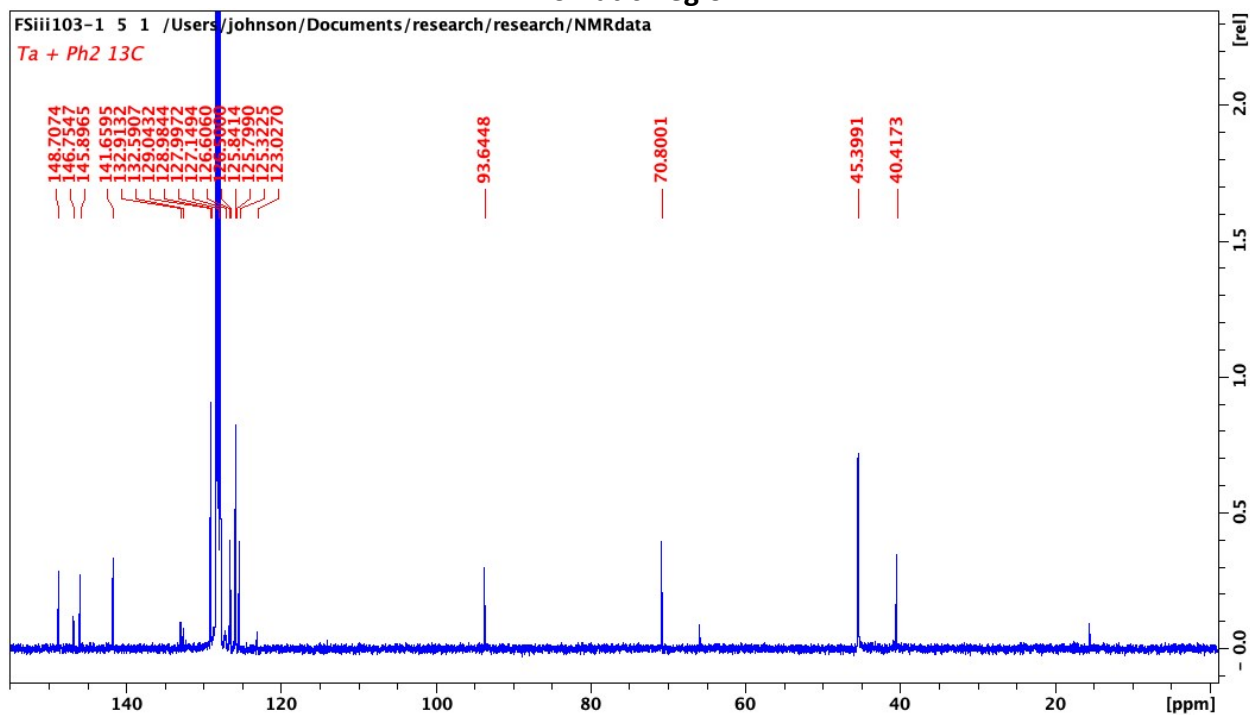

**Full Spectrum**

$^{19}\text{F}$  NMR (376 MHz,  $\text{C}_6\text{D}_6$ ) of **TaPh<sub>3</sub>** {Ta(Ph<sub>3</sub>)(NMe<sub>2</sub>)<sub>3</sub>}

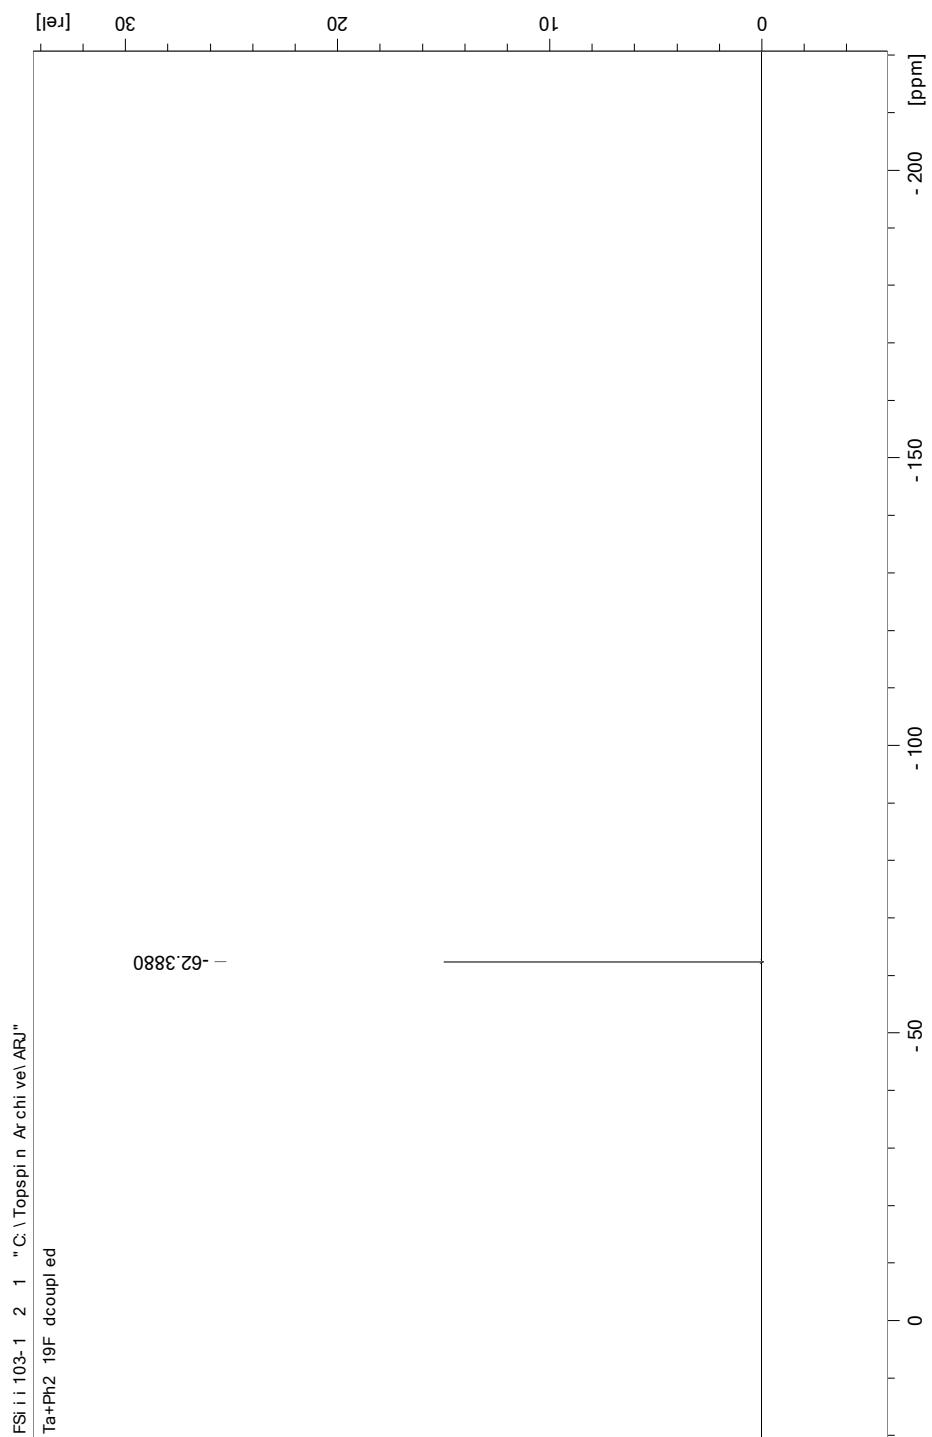

$^1\text{H}$  NMR (400 MHz,  $\text{C}_6\text{D}_6$ ) of **TaPh<sub>3</sub>** {Ta(Ph<sub>3</sub>)(NMe<sub>2</sub>)<sub>3</sub>}

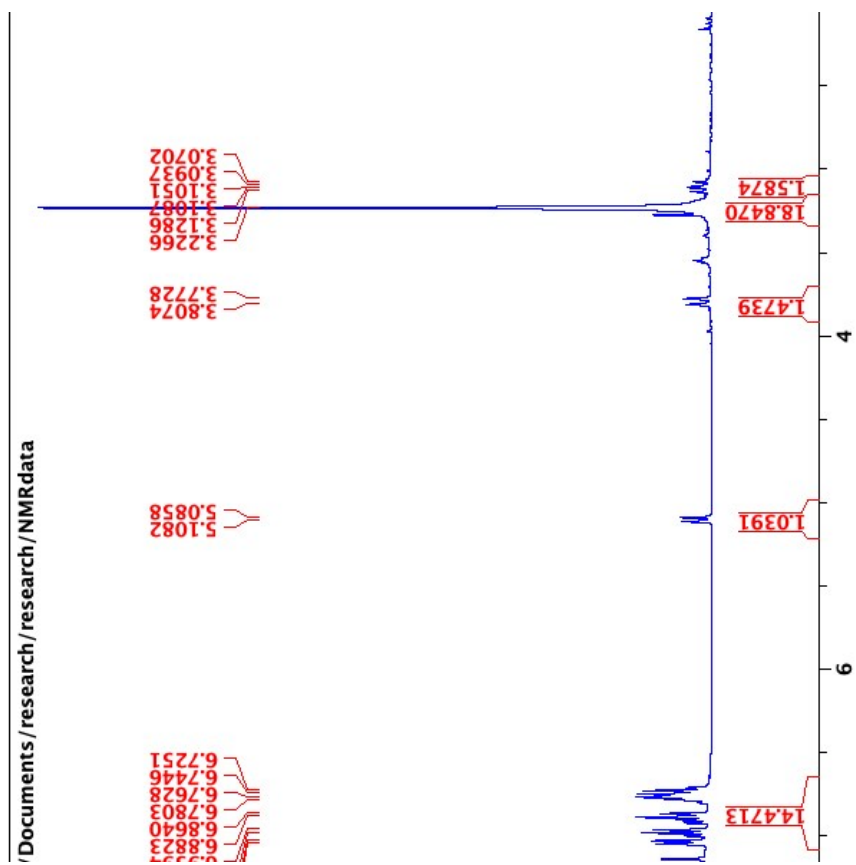

<sup>13</sup>C NMR (100 MHz, C<sub>6</sub>D<sub>6</sub>) of TaPh<sub>3</sub> {Ta(Ph<sub>3</sub>)(NMe<sub>2</sub>)<sub>3</sub>}

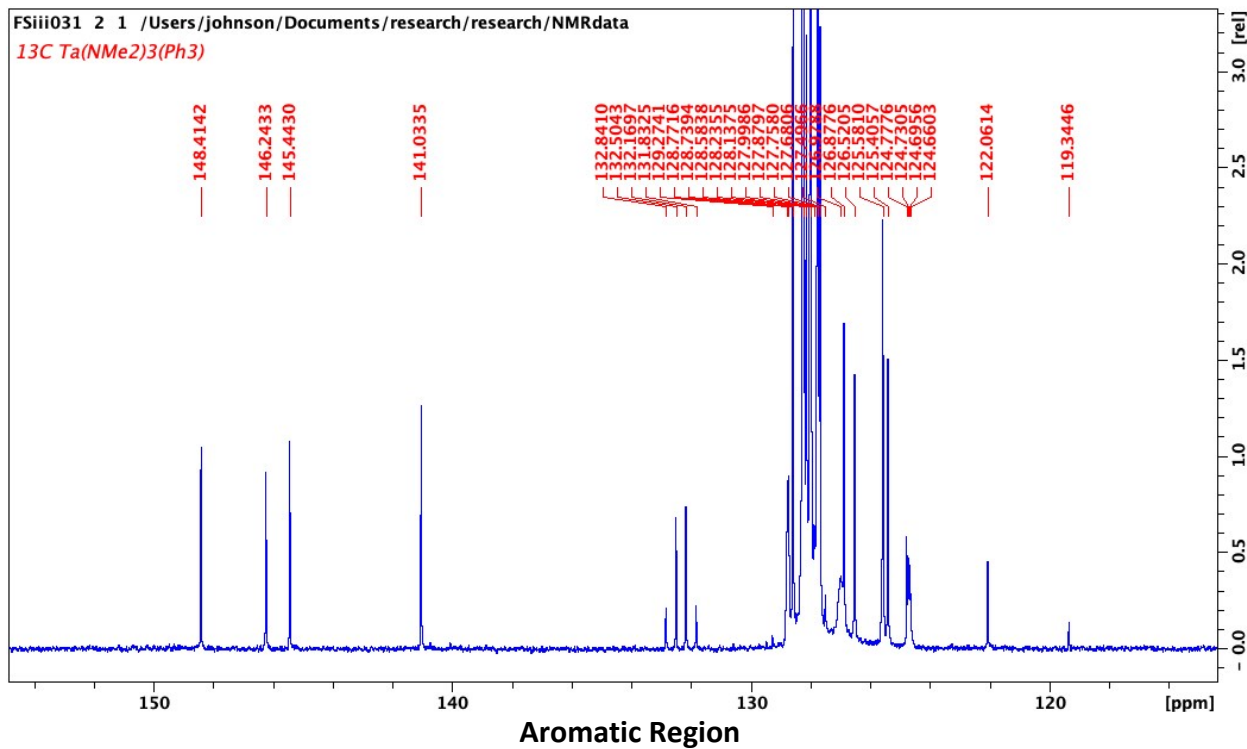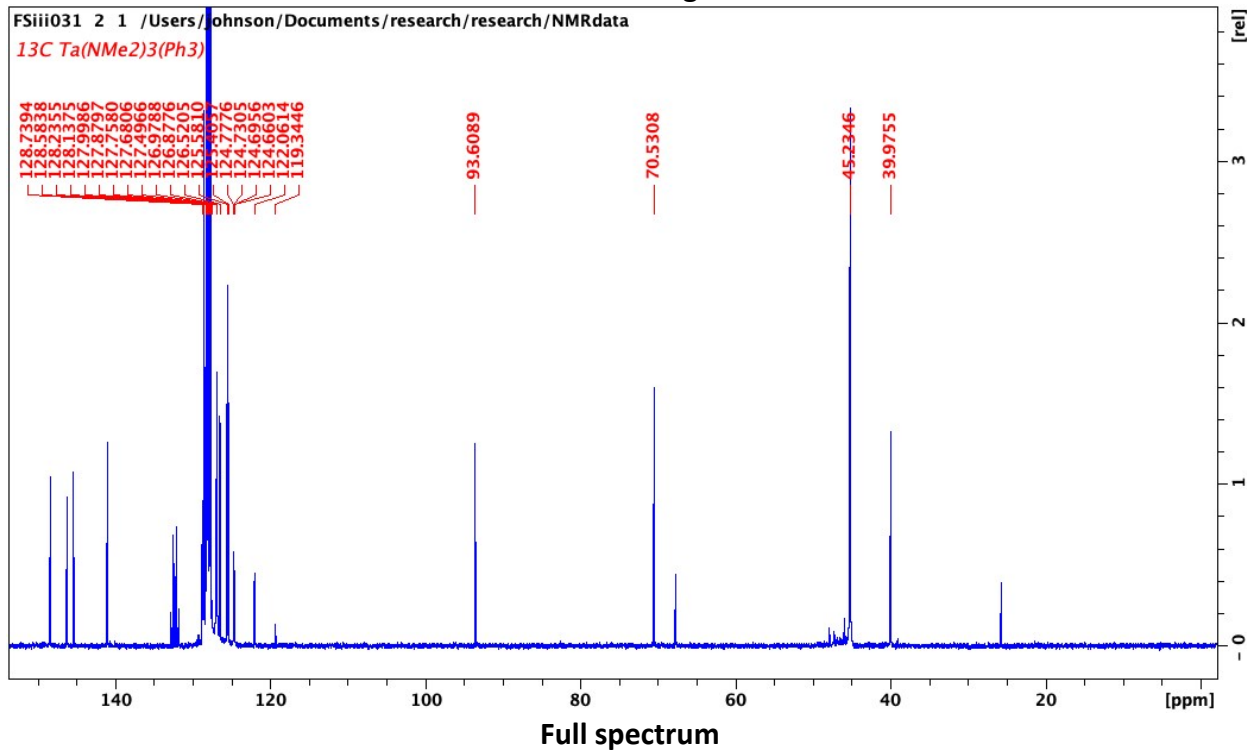



$^{19}\text{F}$  NMR (376 MHz,  $\text{C}_6\text{D}_6$ ) of **TaPh<sub>3</sub>** {Ta(Ph<sub>3</sub>)(NMe<sub>2</sub>)<sub>3</sub>}

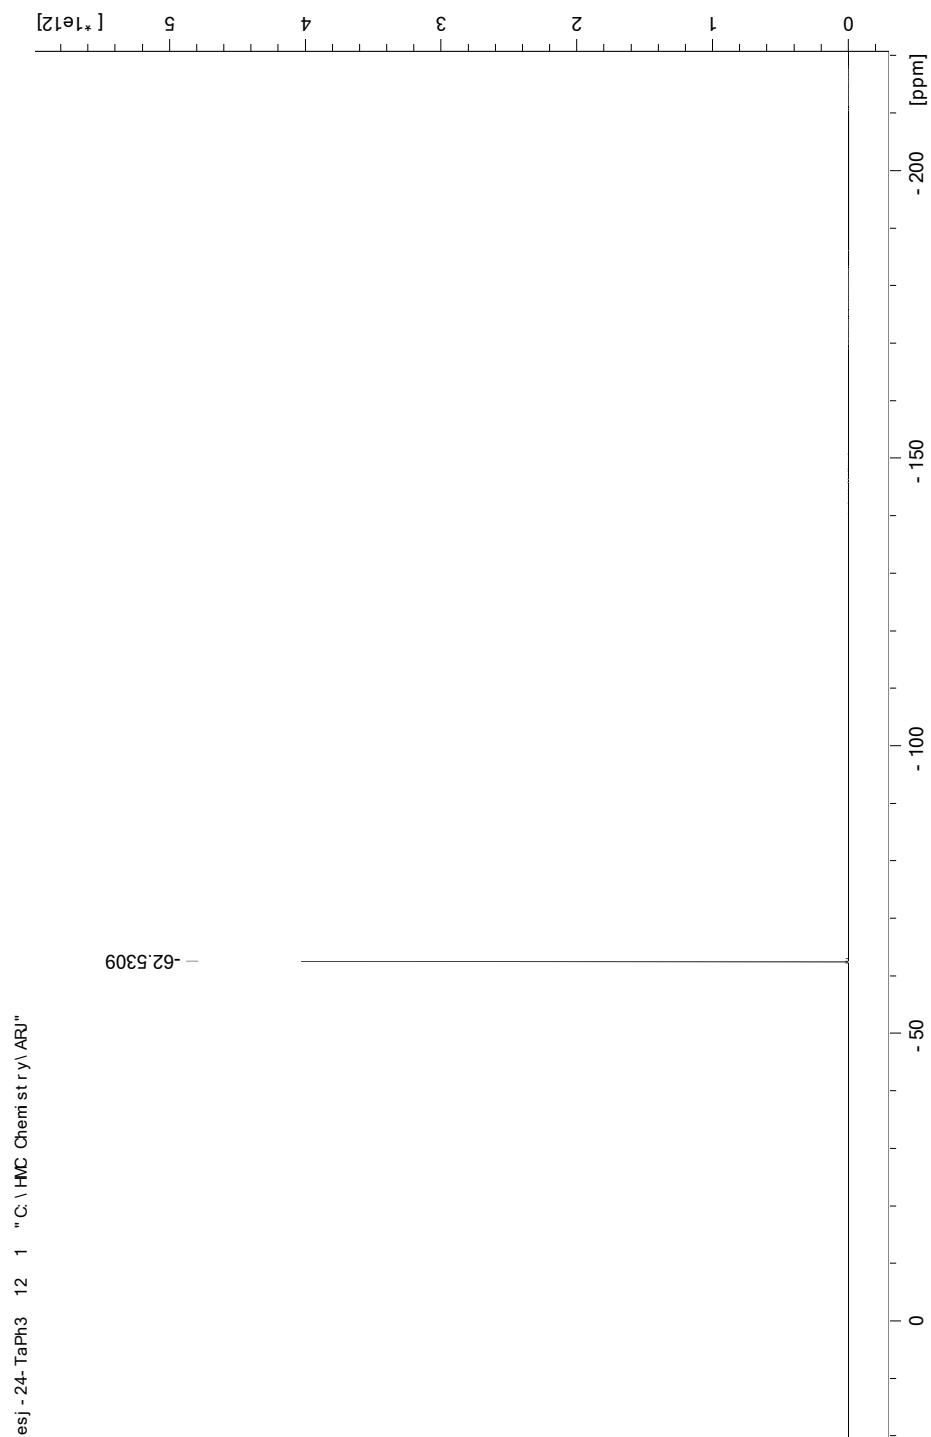

<sup>1</sup>H NMR (400 MHz, C<sub>6</sub>D<sub>6</sub>) of **TaPh<sub>4</sub>** {Ta(Ph<sub>4</sub>)(NMe<sub>2</sub>)<sub>3</sub>}

FSiii127-2 2 1 /Users/johnson/Documents/research/research/NMRdata

Ta + P2PM3S 1H

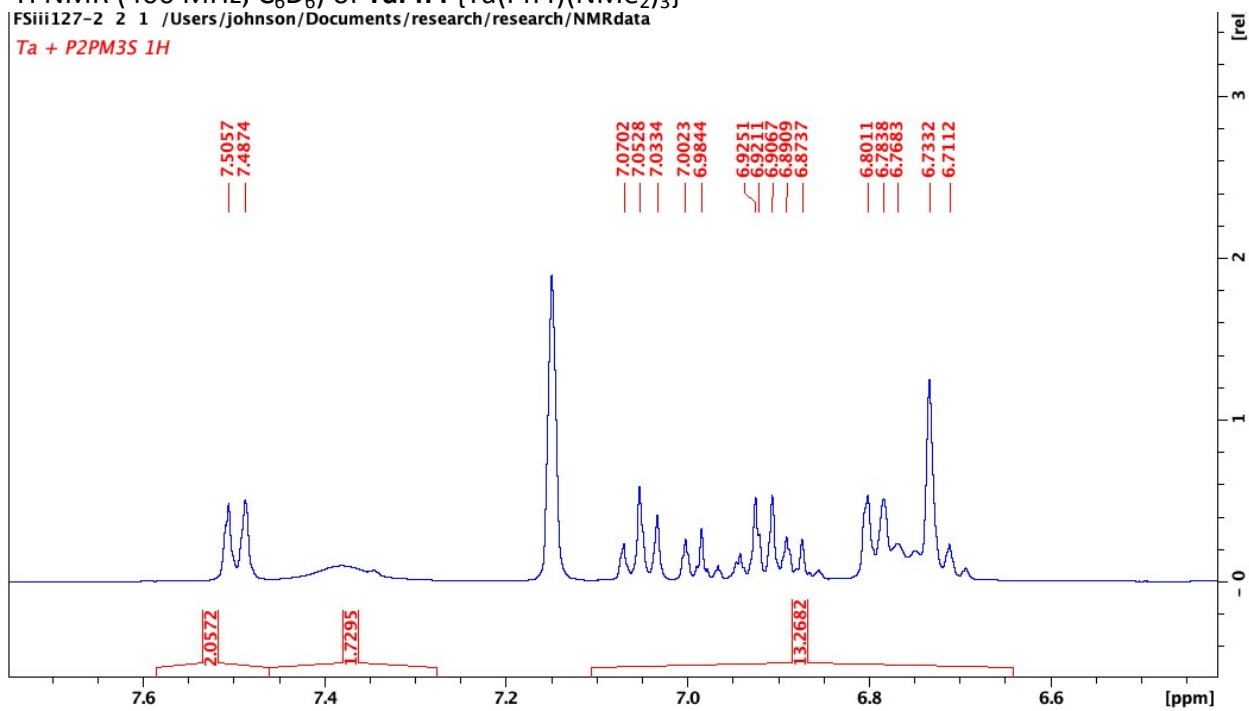

aromatic region

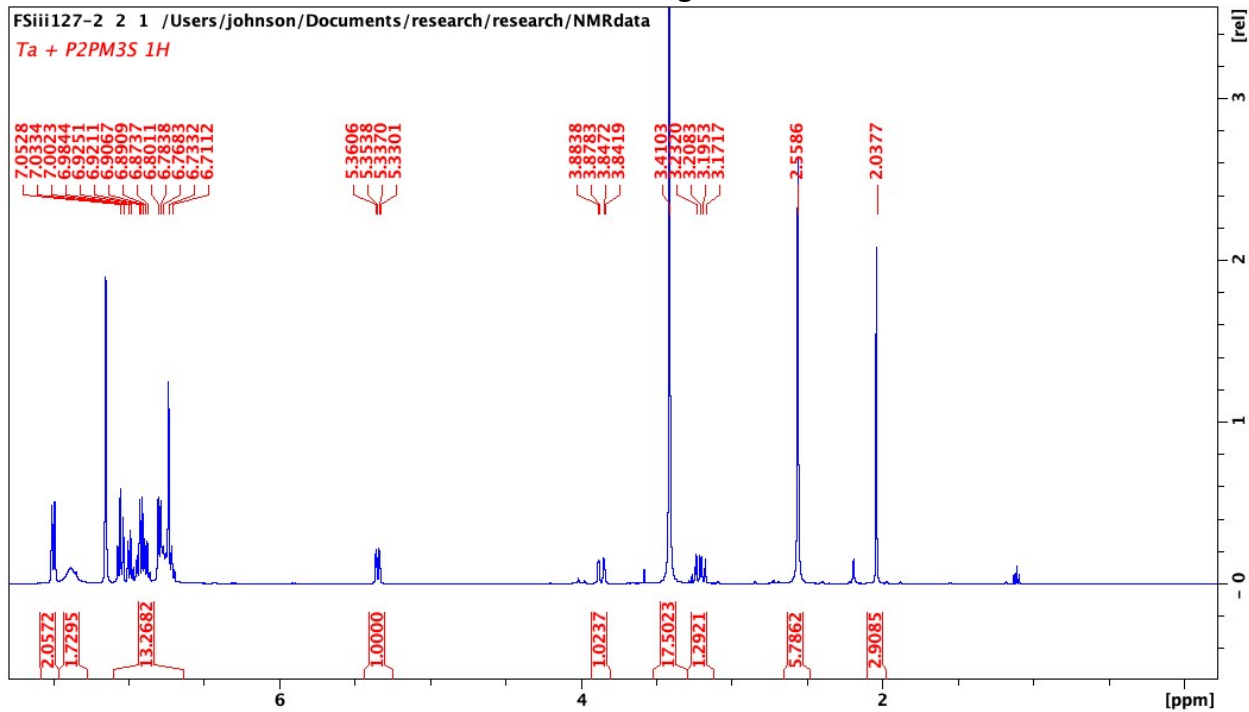

Full spectrum

$^{13}\text{C}$  NMR (100 MHz,  $\text{C}_6\text{D}_6$ ) of

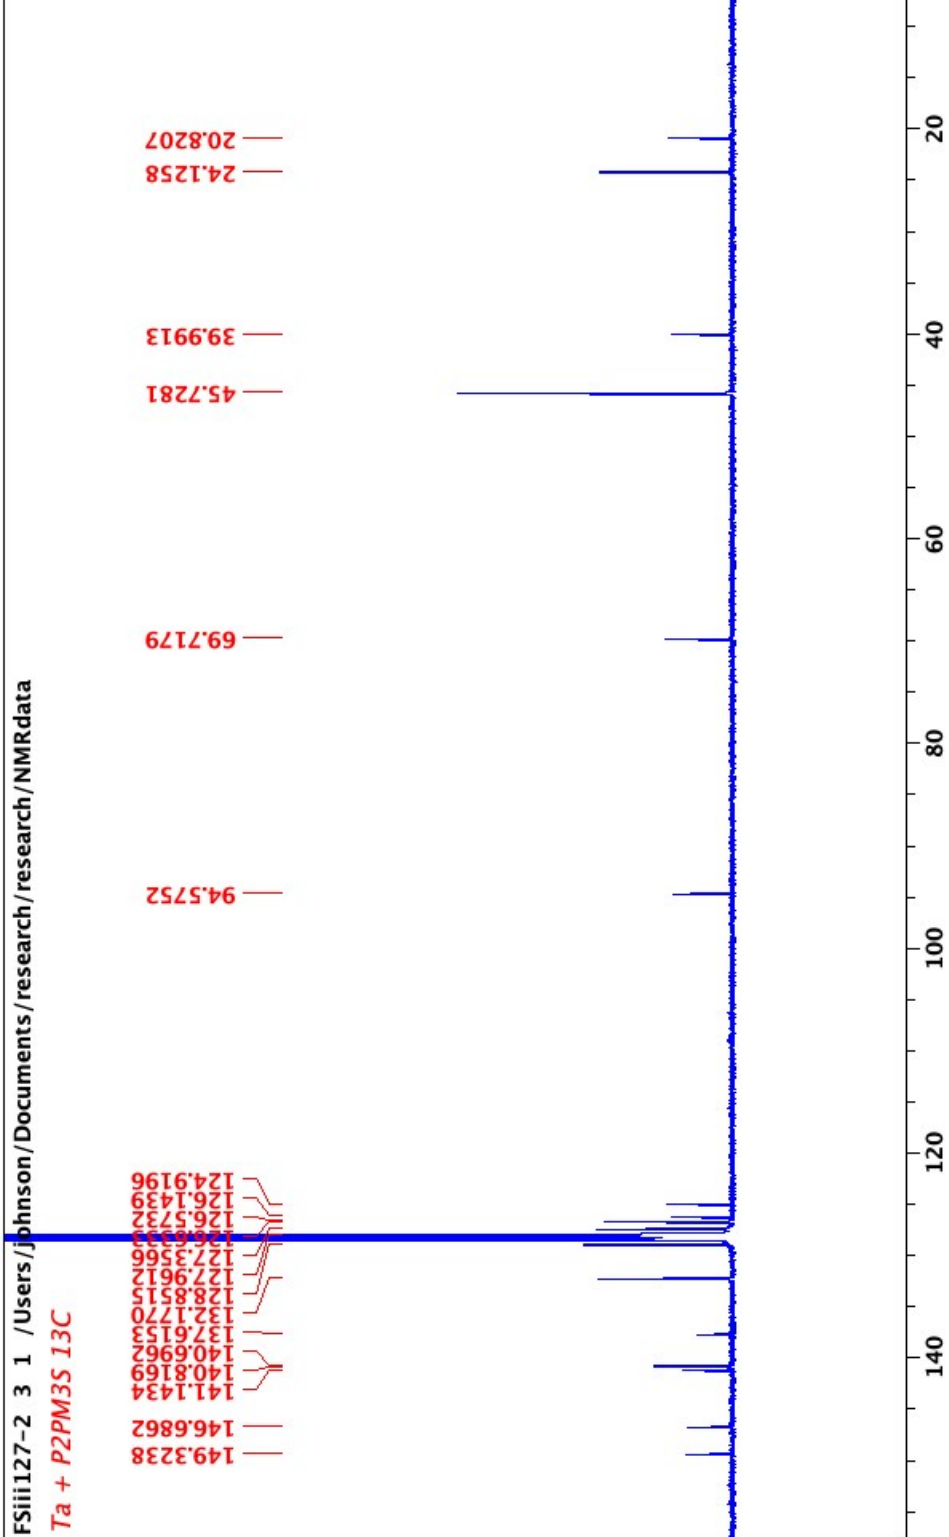

DOSY NMR (400 MHz, C<sub>6</sub>D<sub>6</sub>) of **TiPh1** {Ti(Ph1)(NMe<sub>2</sub>)<sub>2</sub>(HNMe<sub>2</sub>)}

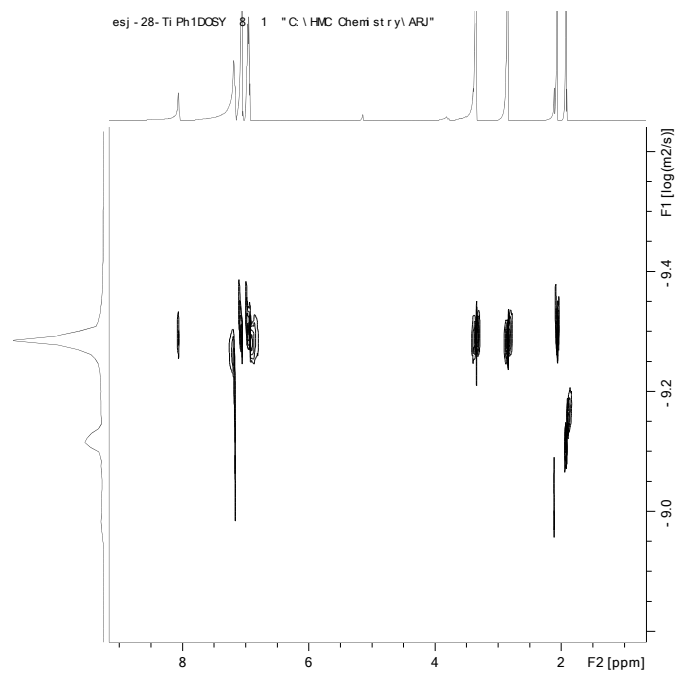

**TiPh1** DOSY fit plot

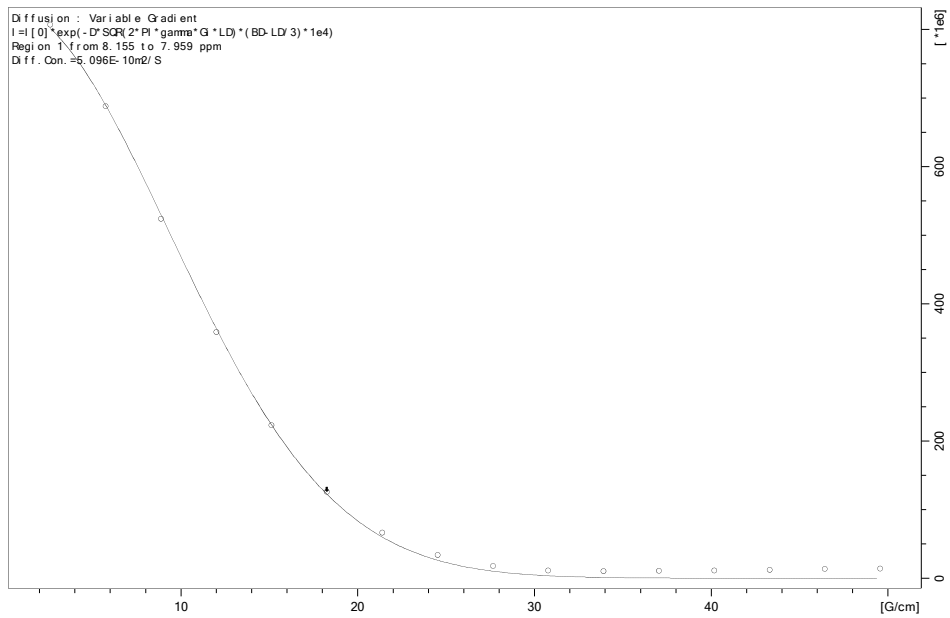

DOSY NMR (400 MHz, C<sub>6</sub>D<sub>6</sub>) of **TiPh<sub>2</sub>** {Ti(Ph<sub>2</sub>)(NMe<sub>2</sub>)<sub>2</sub>(HNMe<sub>2</sub>)}

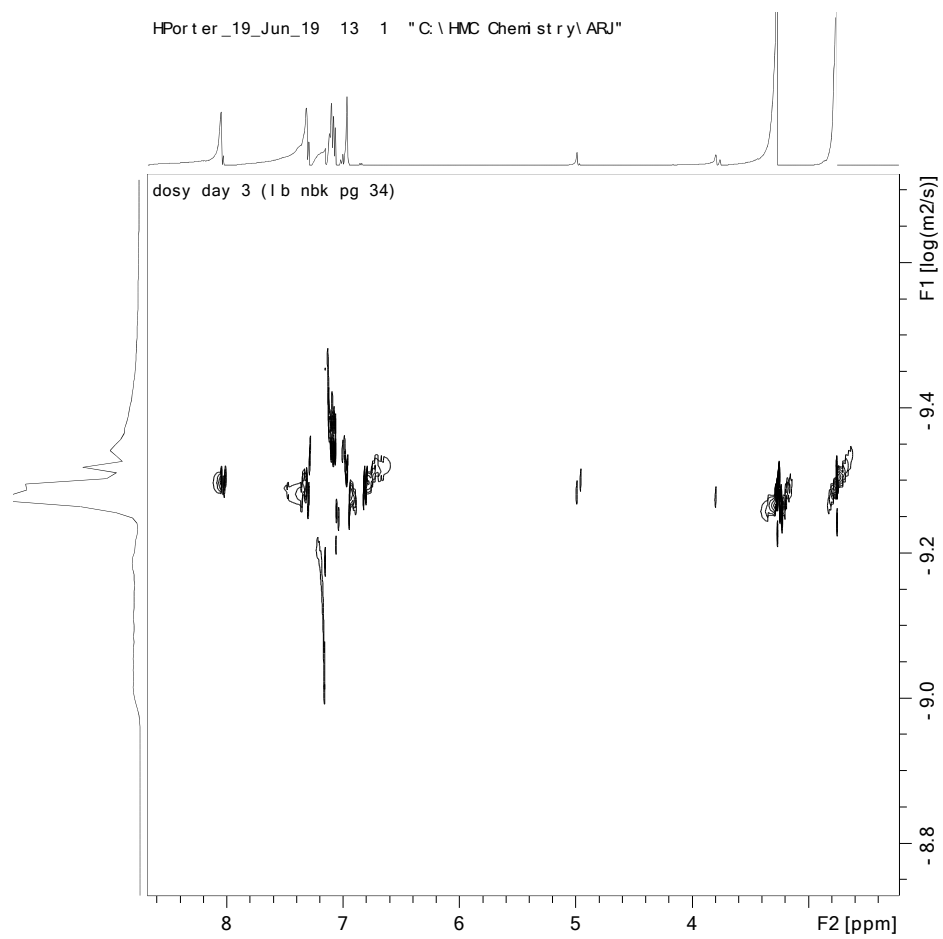

**TiPh<sub>2</sub>** DOSY fit plot

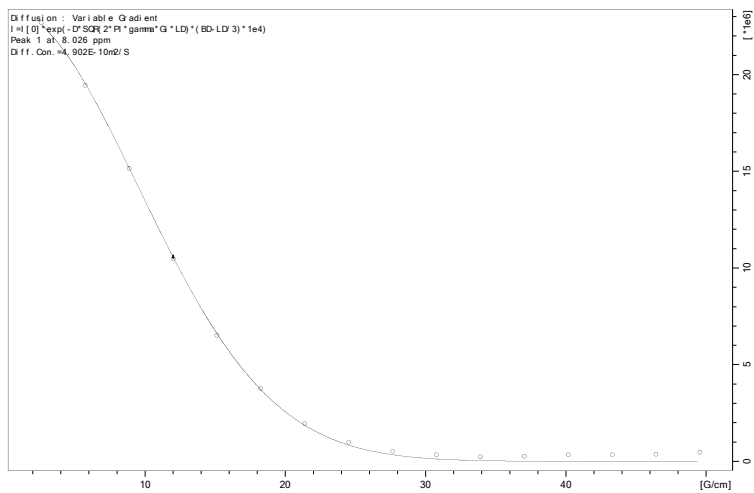

DOSY NMR (400 MHz, C<sub>6</sub>D<sub>6</sub>) of **TiPh<sub>3</sub>** {Ti(Ph<sub>3</sub>)(NMe<sub>2</sub>)<sub>2</sub>(HNMe<sub>2</sub>)}

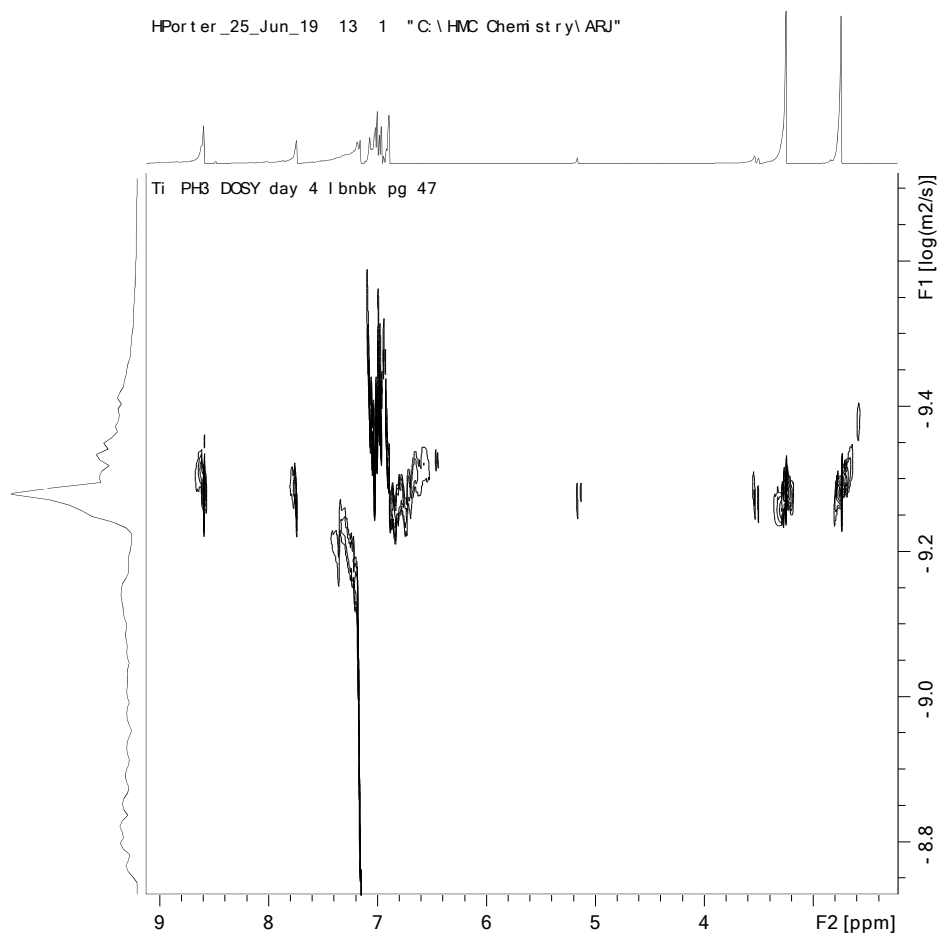

**TiPh<sub>3</sub>** DOSY fit plot



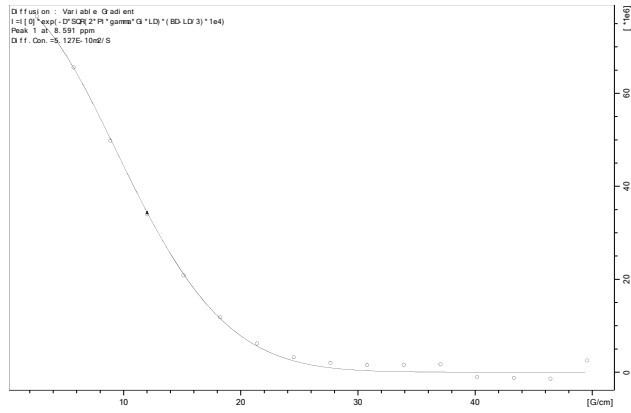

DOSY NMR (400 MHz, C<sub>6</sub>D<sub>6</sub>) of **TiPh<sub>4</sub>** {Ti(Ph<sub>4</sub>)(NMe<sub>2</sub>)<sub>2</sub>}

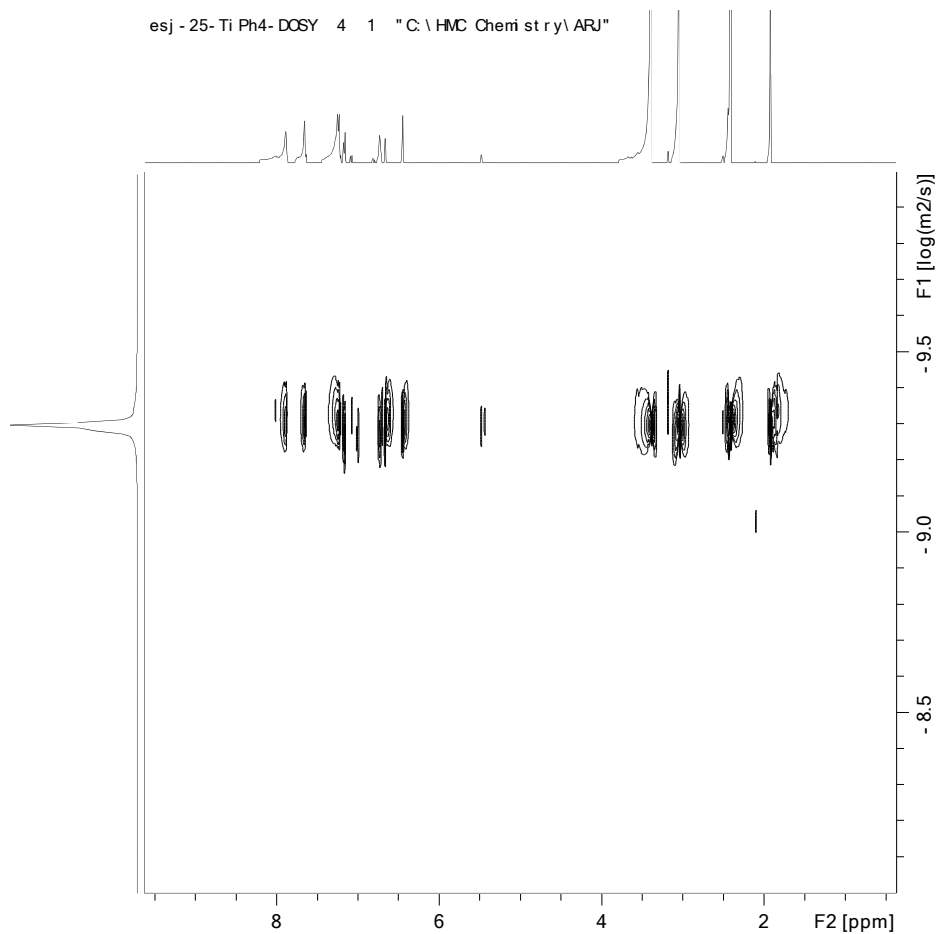

**TiPh<sub>4</sub>** DOSY fit plot

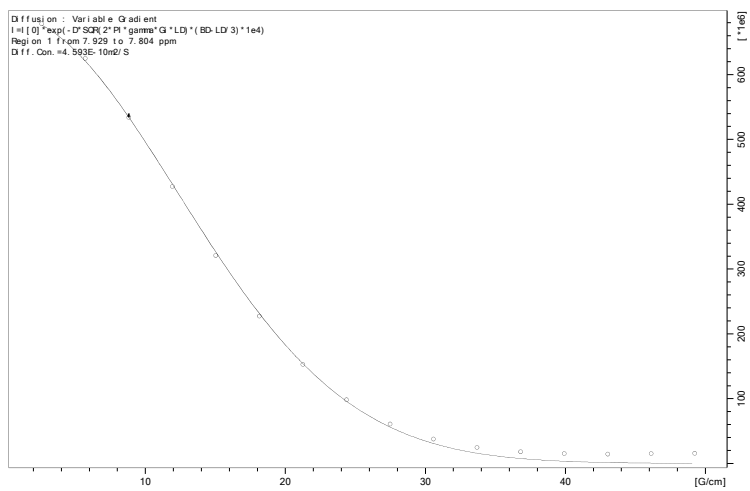

DOSY NMR (400 MHz, C<sub>6</sub>D<sub>6</sub>) of **TaPh1** {Ta(Ph1)(NMe<sub>2</sub>)<sub>3</sub>}

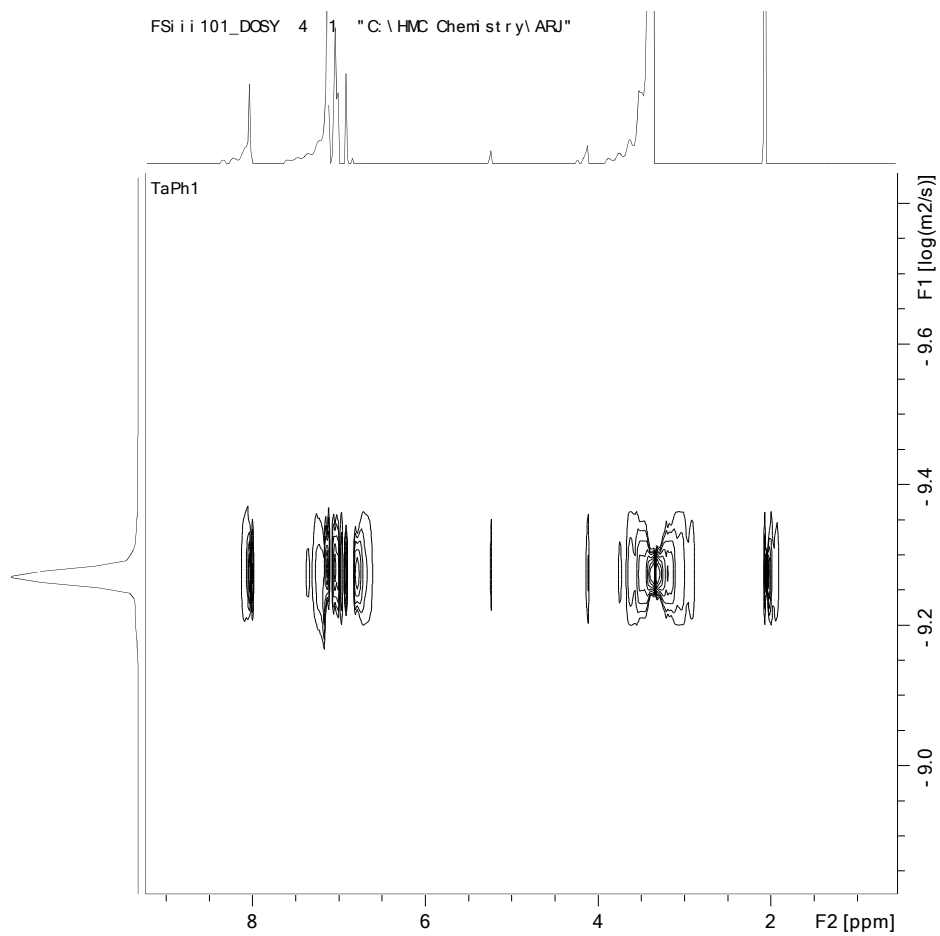

**TaPh1** DOSY fit plot

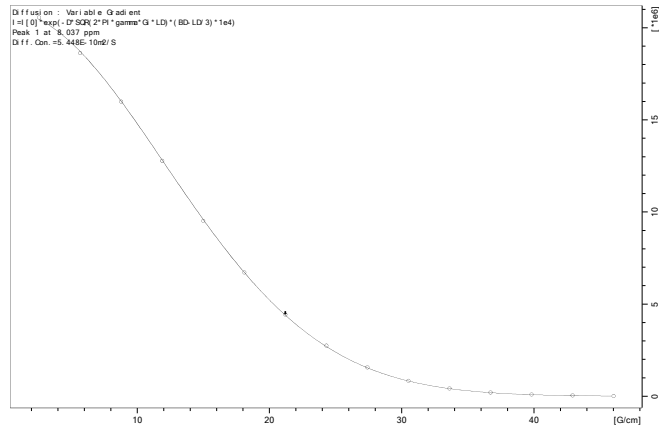

DOSY NMR (400 MHz, C<sub>6</sub>D<sub>6</sub>) of **TaPh<sub>2</sub>** {Ta(Ph<sub>2</sub>)(NMe<sub>2</sub>)<sub>3</sub>}

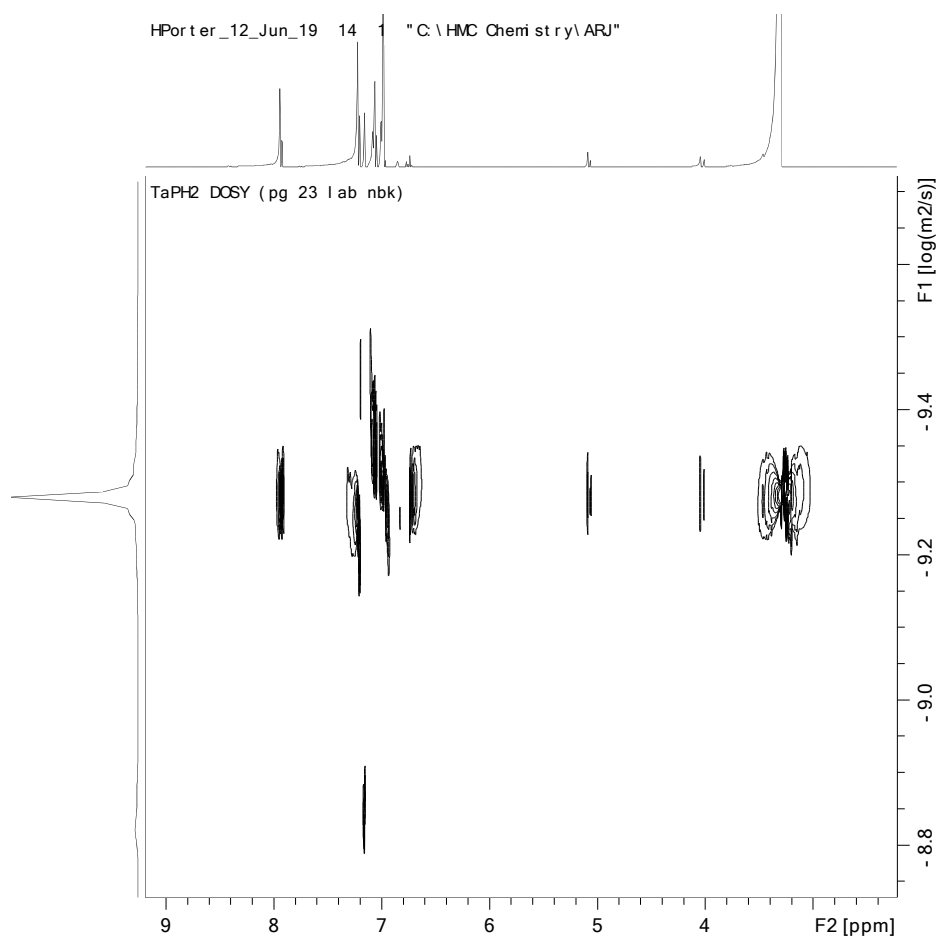

**TaPh<sub>2</sub>** DOSY fit plot

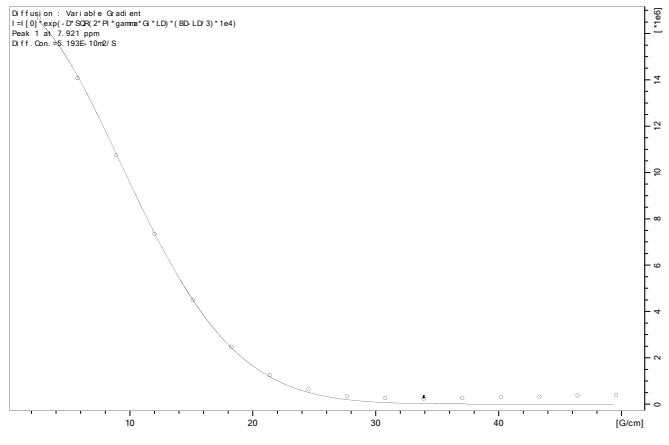

DOSY NMR (400 MHz, C<sub>6</sub>D<sub>6</sub>) of **TaPh<sub>3</sub>** {Ta(Ph<sub>3</sub>)(NMe<sub>2</sub>)<sub>3</sub>}

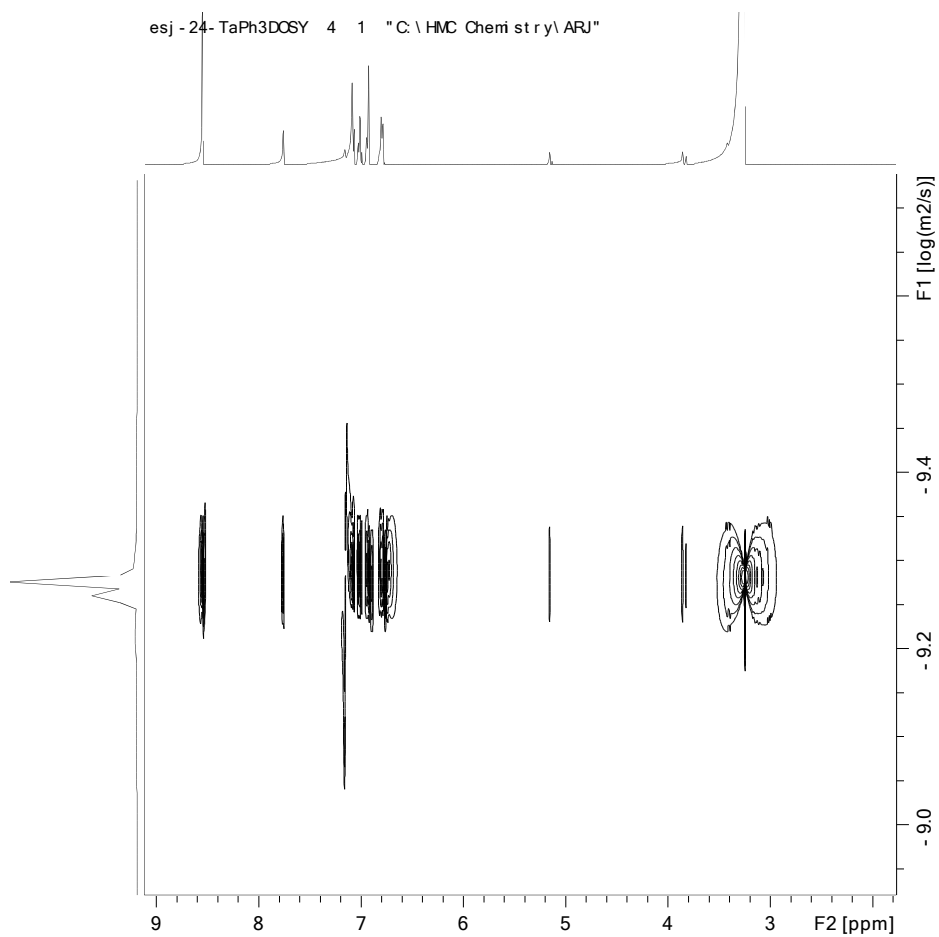

**TaPh<sub>3</sub>** DOSY fit plot



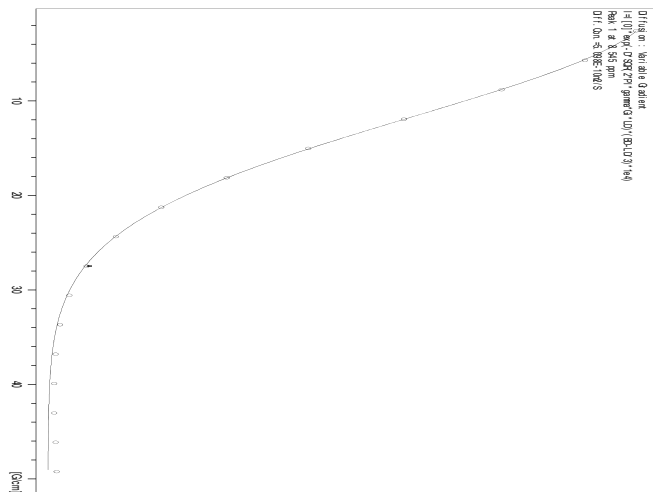

DOSY NMR (400 MHz, C<sub>6</sub>D<sub>6</sub>) of **TaPh<sub>4</sub>** {Ta(Ph<sub>4</sub>)(NMe<sub>2</sub>)<sub>3</sub>}

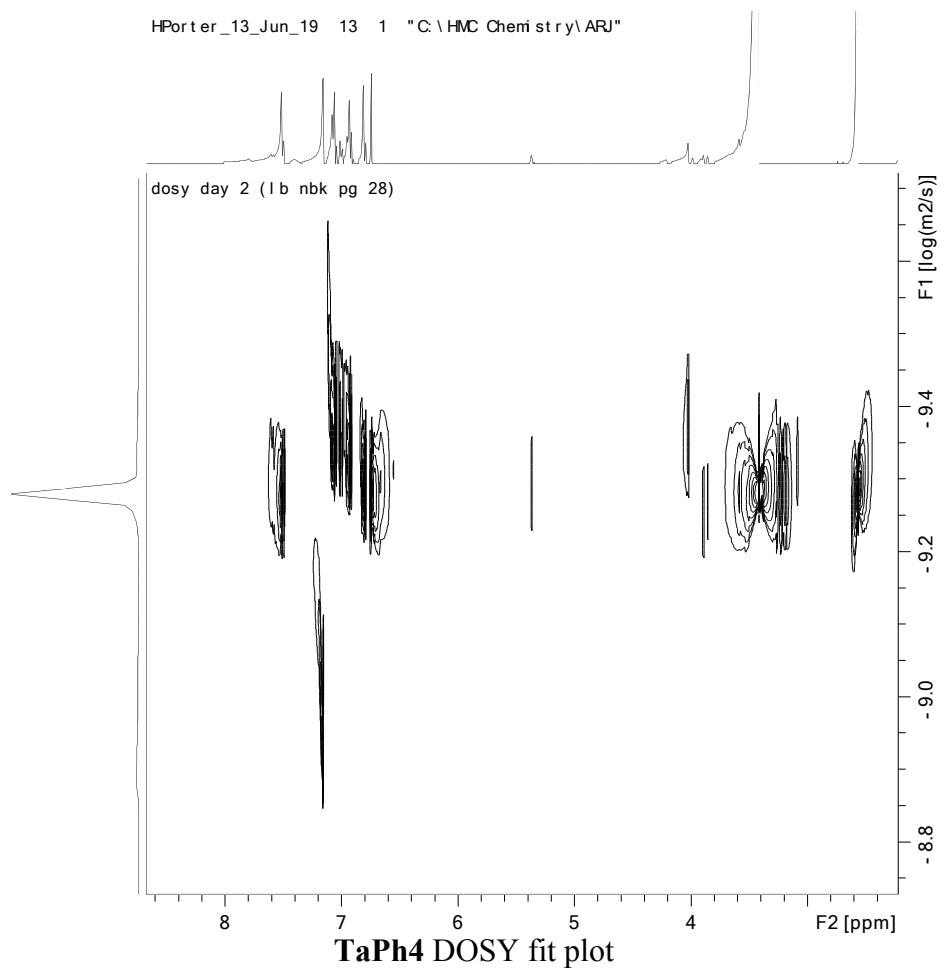

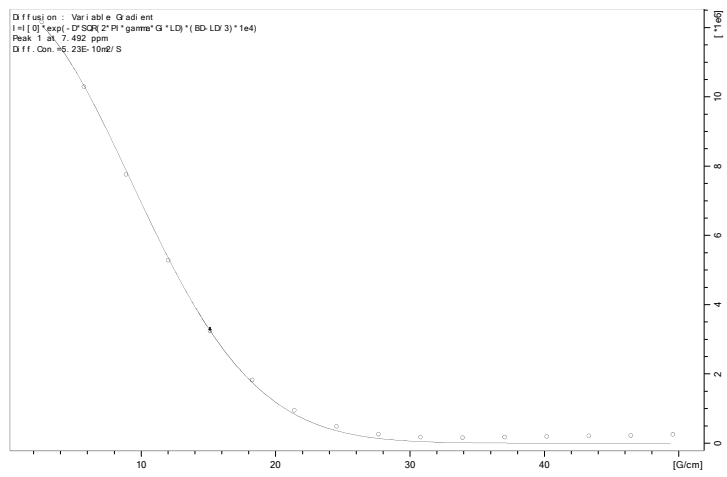

GC traces for the hydroamination of 6-methyl-hepta-4,5-dienylamine 1b at 135 °C with *in situ* catalysts (5 mol% catalyst). Retention times are  $\pm 0.3$  min from run to run.

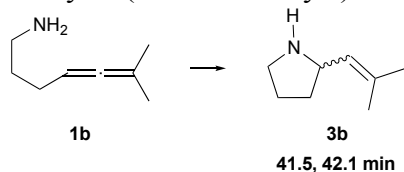

Representative GC traces are shown; each ee is an average of 2 injections for each of 2 runs.

### TiPh1

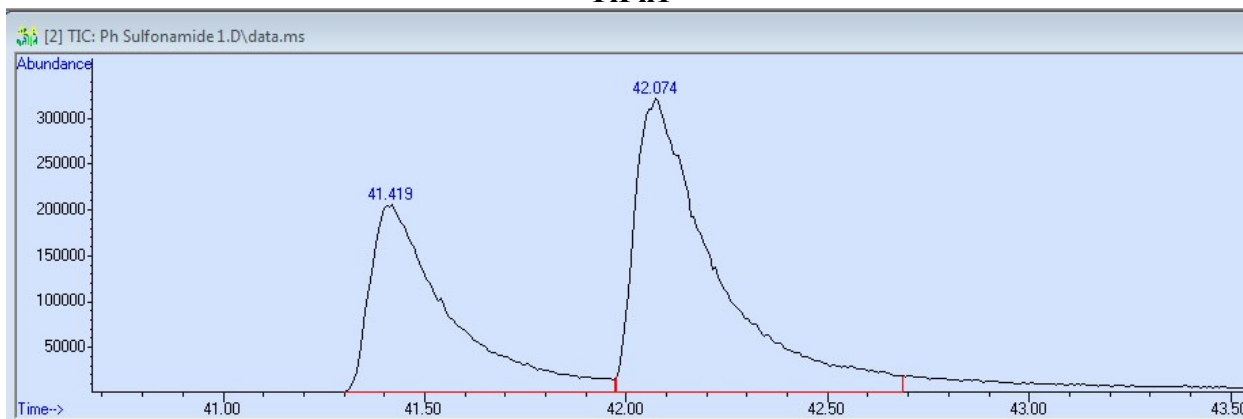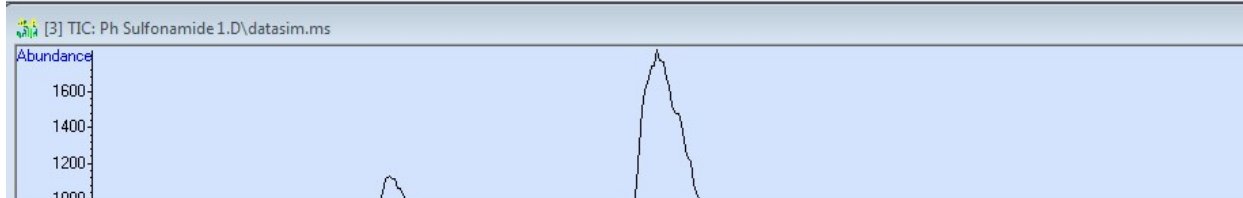

D:\MassHunter\GCMS\1\data\Johnson Lab\Ph Sulfonamide 1.D\rtres.txt

#### Area Percent Report

Data Path : D:\MassHunter\GCMS\1\data\Johnson Lab\  
 Data File : Ph Sulfonamide 1.D  
 Acq On : 12 Jul 2018 09:37  
 Operator : arj  
 Sample :  
 Misc :  
 ALS Vial : 1 Sample Multiplier: 1

Integration Parameters: events.e  
 Integrator: ChemStation

Method : D:\MassHunter\GCMS\1\data\Johnson Lab\d-TtBu-Ti-1\_test50.D\chiraldexbDM\_50split.M  
 Title :

Signal : TIC: Ph Sulfonamide 1.D\data.ms

| peak # | R.T. min | first scan | max scan | last scan | PK TY | peak height | corr. area | corr. % max. | % of total |
|--------|----------|------------|----------|-----------|-------|-------------|------------|--------------|------------|
| 1      | 41.419   | 4840       | 4856     | 4930      | M     | 205798      | 27718937   | 61.97%       | 38.259%    |
| 2      | 42.074   | 4930       | 4943     | 5025      | M2    | 321987      | 44731316   | 100.00%      | 61.741%    |

# TiPh2

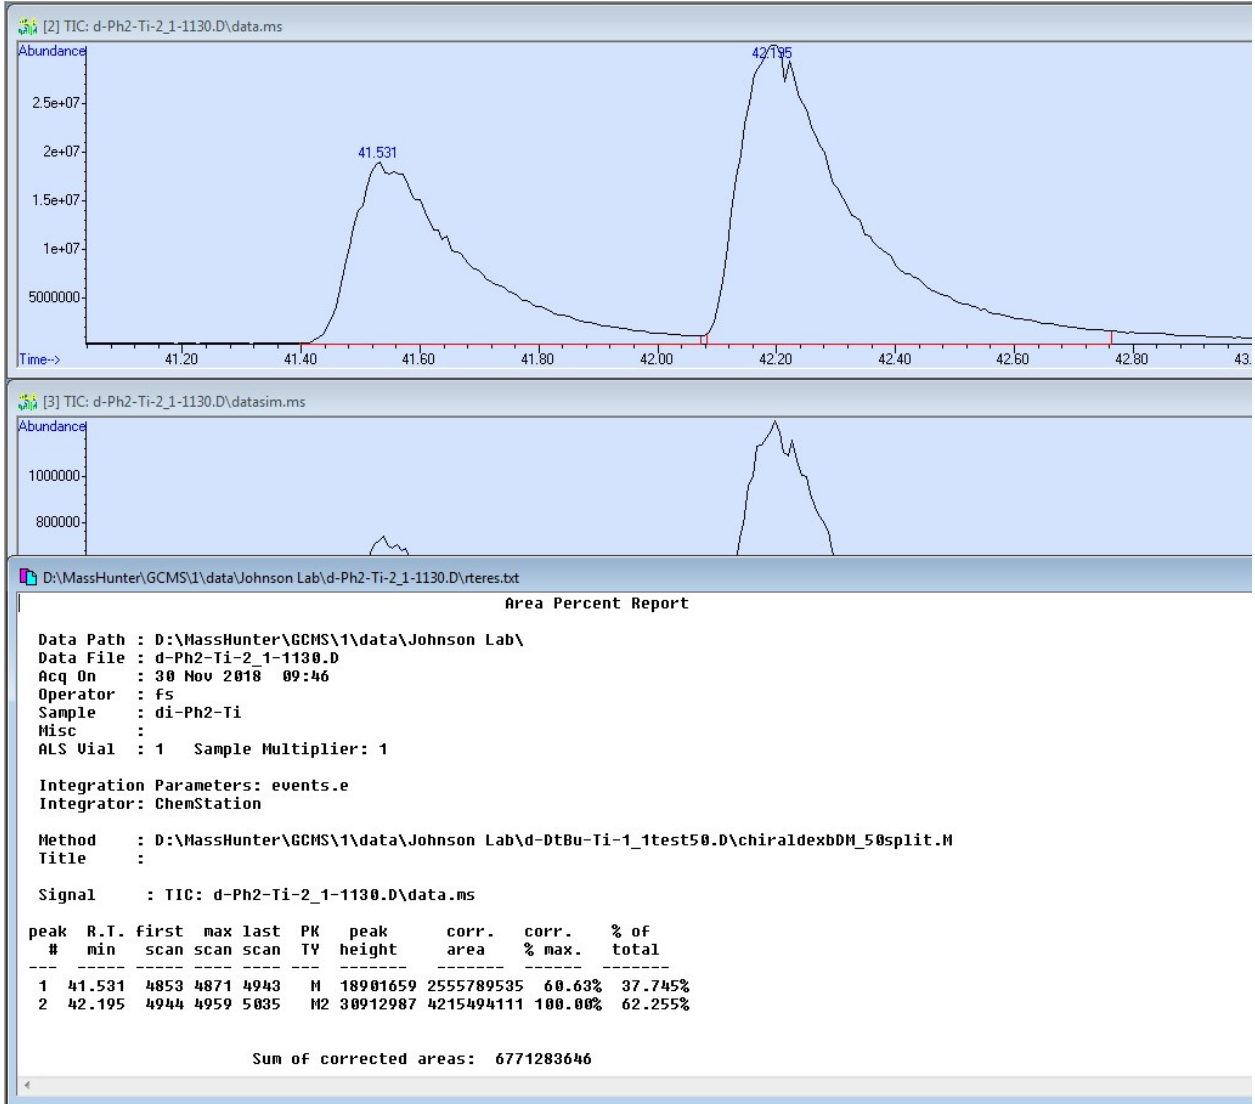

# TiPh3, (5% loading)

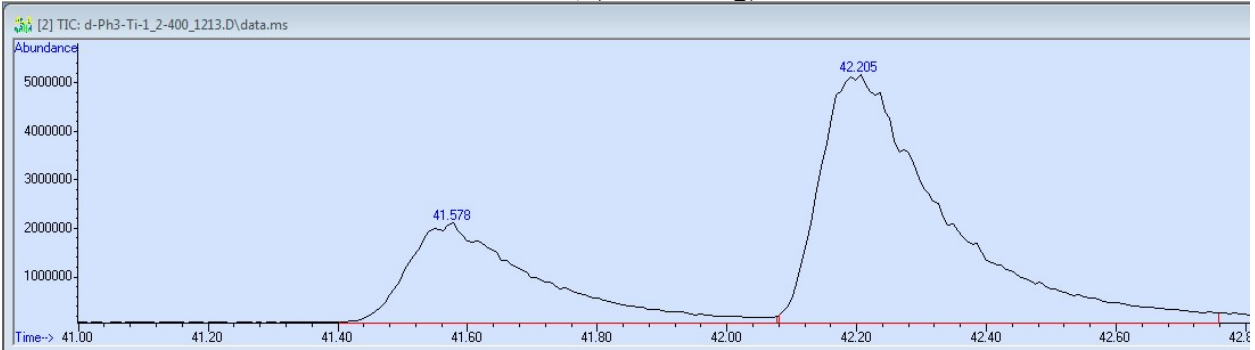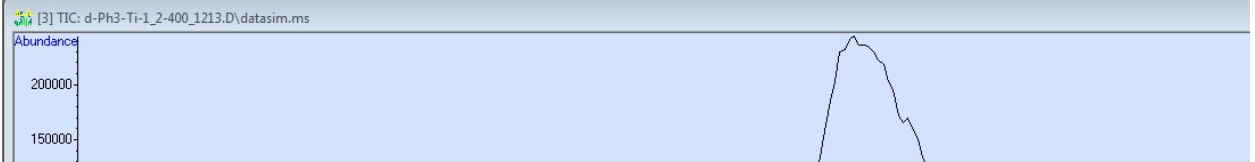

D:\MassHunter\GCMS\1\data\Johnson Lab\d-Ph3-Ti-1\_2-400\_1213.D\rtres.txt

### Area Percent Report

Data Path : D:\MassHunter\GCMS\1\data\Johnson Lab\  
 Data File : d-Ph3-Ti-1\_2-400\_1213.D  
 Acq On : 13 Dec 2018 11:53  
 Operator : fs  
 Sample : di-Ph3-Ti  
 Misc :  
 ALS Vial : 1 Sample Multiplier: 1

Integration Parameters: events.e  
 Integrator: ChemStation

Method : D:\MassHunter\GCMS\1\data\Johnson Lab\d-DtBu-Ti-1\_1test50.D\chiraldexbDM\_50split.M  
 Title :

Signal : TIC: d-Ph3-Ti-1\_2-400\_1213.D\data.ms

| peak # | R.T. min | first scan | max scan | last scan | PK TV | peak height | corr. area | corr. % max. | % of total |
|--------|----------|------------|----------|-----------|-------|-------------|------------|--------------|------------|
| 1      | 41.578   | 4854       | 4877     | 4944      | H6    | 2057874     | 285417725  | 41.45%       | 29.302%    |
| 2      | 42.205   | 4944       | 4961     | 5035      | H4    | 5125755     | 688622622  | 100.00%      | 70.698%    |

Sum of corrected areas: 974040347

### TiPh3, (10% loading)

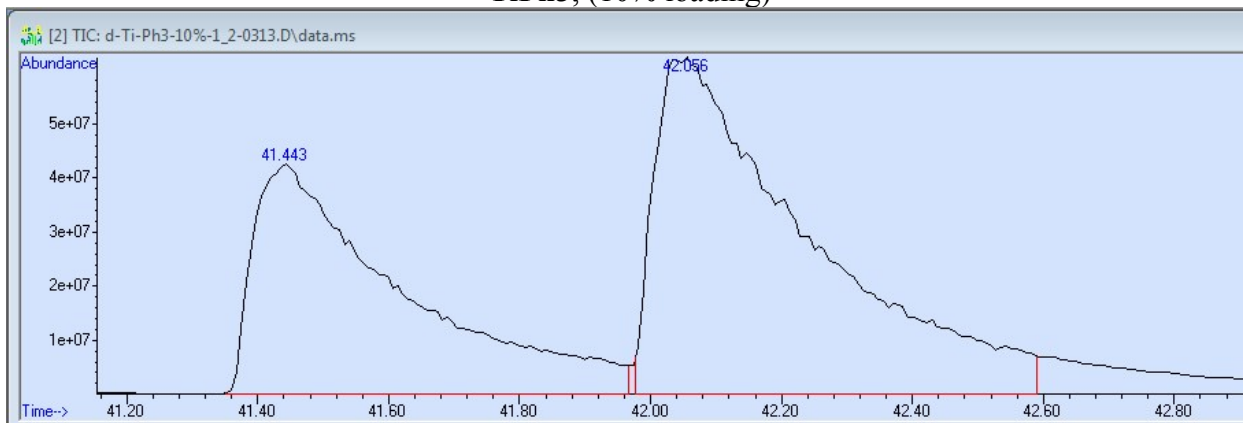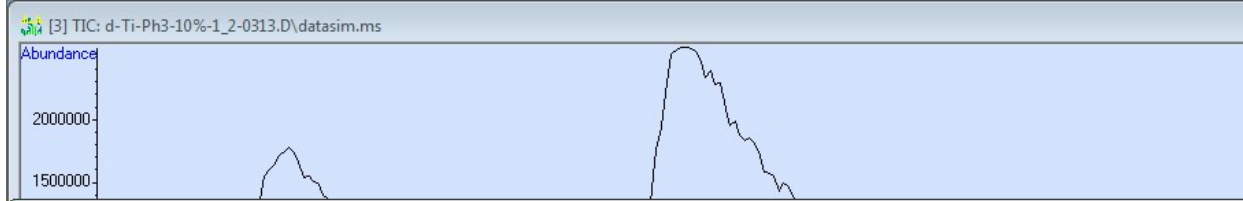

D:\MassHunter\GCMS\1\data\Johnson Lab\d-Ti-Ph3-10%-1\_2-0313.D\nteres.txt

#### Area Percent Report

Data Path : D:\MassHunter\GCMS\1\data\Johnson Lab\  
 Data File : d-Ti-Ph3-10%-1\_2-0313.D  
 Acq On : 14 Mar 2019 02:24  
 Operator : fs  
 Sample : d-Ti-Ph3-10%-1\_2  
 Misc :  
 ALS Vial : 5 Sample Multiplier: 1

Integration Parameters: events.e  
 Integrator: ChemStation

Method : D:\MassHunter\GCMS\1\data\Johnson Lab\d-DtBu-Ti-1\_1test50.D\chiraldexbDM\_50split.M  
 Title :

Signal : TIC: d-Ti-Ph3-10%-1\_2-0313.D\data.ms

| peak # | R.T. min | first scan | max scan | last scan | PK TY | peak height | corr. area  | corr. % max. | % of total |
|--------|----------|------------|----------|-----------|-------|-------------|-------------|--------------|------------|
| 1      | 41.443   | 4847       | 4859     | 4929      | M     | 42571901    | 6694813677  | 65.64%       | 39.628%    |
| 2      | 42.056   | 4930       | 4941     | 5012      | M3    | 62350679    | 10199310990 | 100.00%      | 60.372%    |

# TiPh4

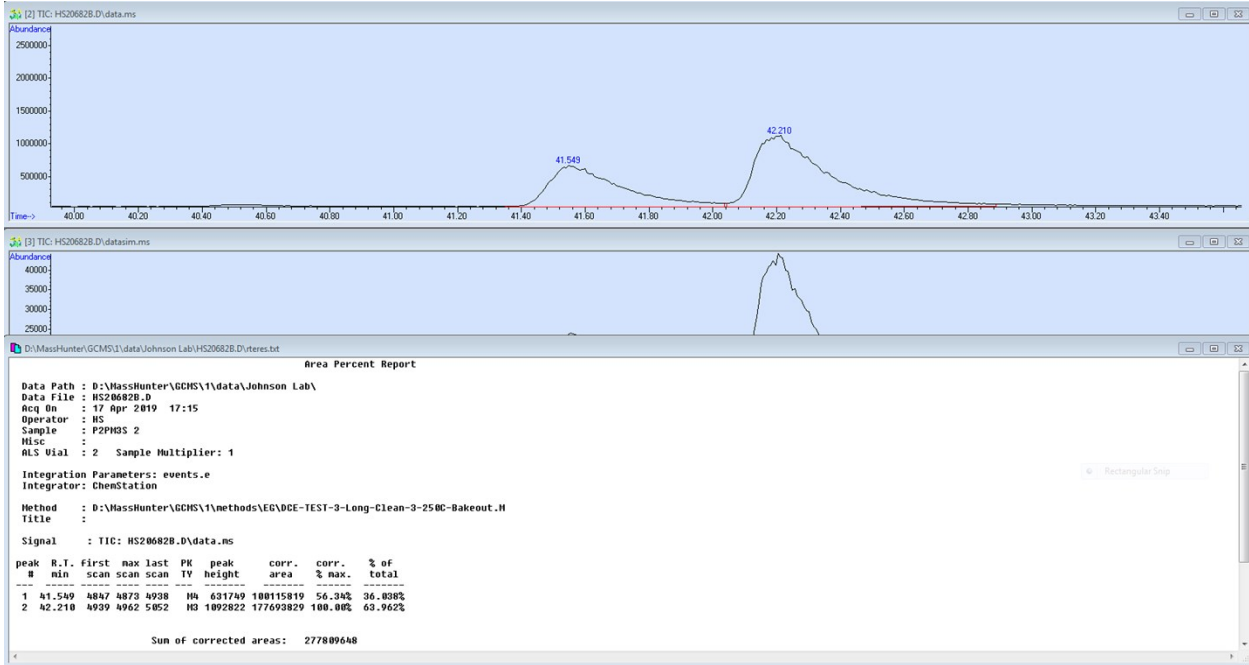



# TaPh1

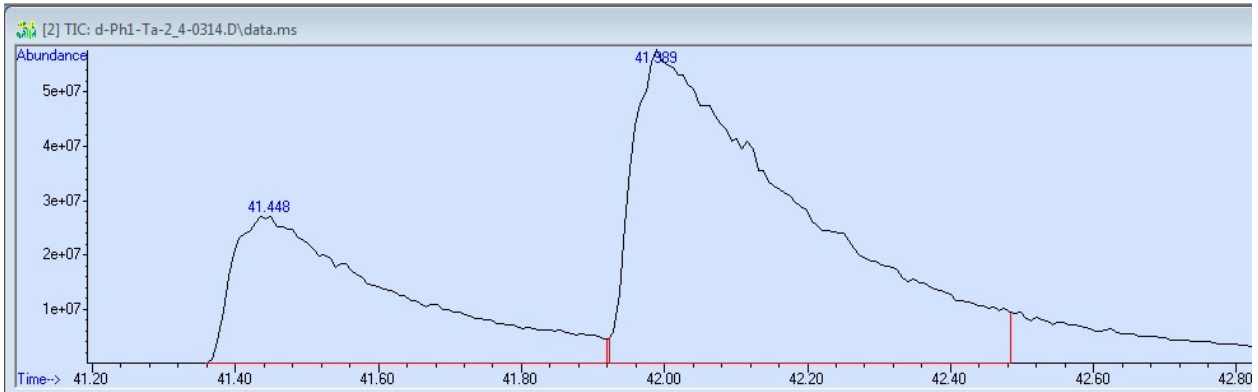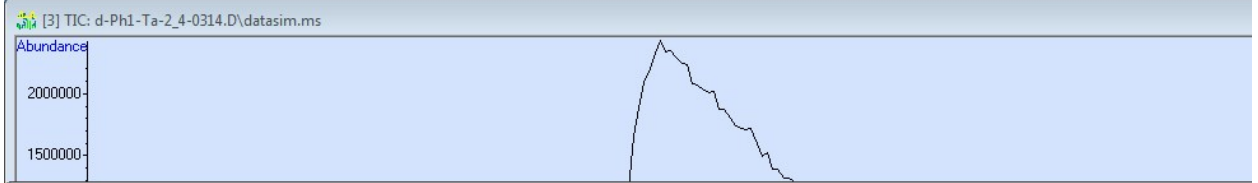

D:\MassHunter\GCMS\1\data\Johnson Lab\d-Ph1-Ta-2\_4-0314.D\teres.txt

### Area Percent Report

Data Path : D:\MassHunter\GCMS\1\data\Johnson Lab\  
Data File : d-Ph1-Ta-2\_4-0314.D  
Acq On : 14 Mar 2019 19:55  
Operator : fs  
Sample : d-Ph1-Ta-2\_4  
Misc :  
ALS Vial : 2 Sample Multiplier: 1

Integration Parameters: events.e  
Integrator: ChemStation

Method : D:\MassHunter\GCMS\1\data\Johnson Lab\d-DtBu-Ti-1\_test50.D\chiraldexbDM\_50split.M  
Title :

Signal : TIC: d-Ph1-Ta-2\_4-0314.D\data.ms

| peak # | R.T. min | first scan | max scan | last scan | PK TV | peak height | corr. area | corr. % max. | % of total |
|--------|----------|------------|----------|-----------|-------|-------------|------------|--------------|------------|
| 1      | 41.448   | 4848       | 4860     | 4923      | M2    | 27152433    | 4332552889 | 45.39%       | 31.220%    |
| 2      | 41.989   | 4923       | 4932     | 4998      | M2    | 57709509    | 9545005380 | 100.00%      | 68.780%    |

# TaPh2

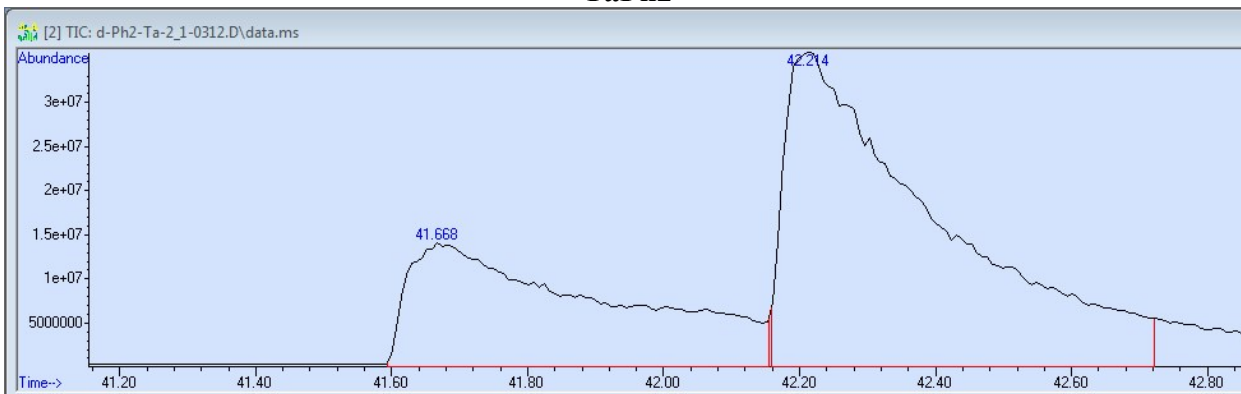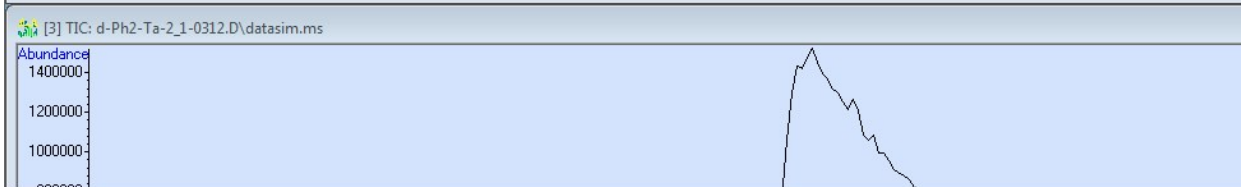

Area Percent Report

Data Path : D:\MassHunter\GCMS\1\data\Johnson Lab\d-Ph2-Ta-2\_1-0312.D\rtres.txt

Data File : d-Ph2-Ta-2\_1-0312.D  
 Acq On : 13 Mar 2019 10:23  
 Operator : fs  
 Sample : d-Ta-Ph2(2-1)  
 Misc :  
 ALS Vial : 8 Sample Multiplier: 1

Integration Parameters: events.e  
 Integrator: ChemStation

Method : D:\MassHunter\GCMS\1\data\Johnson Lab\d-DtBu-Ti-1\_1test50.D\chiraldexbDM\_50split.M  
 Title :

Signal : TIC: d-Ph2-Ta-2\_1-0312.D\data.ms

| peak # | R.T. min | first scan | max scan | last scan | PK TY | peak height | corr. area | corr. % max. | % of total |
|--------|----------|------------|----------|-----------|-------|-------------|------------|--------------|------------|
| 1      | 41.668   | 4879       | 4889     | 4954      | M3    | 14021431    | 2842792639 | 51.11%       | 33.825%    |
| 2      | 42.214   | 4955       | 4962     | 5030      | M2    | 35640343    | 5561592609 | 100.00%      | 66.175%    |

Sum of corrected areas: 8404385248

# TaPh3

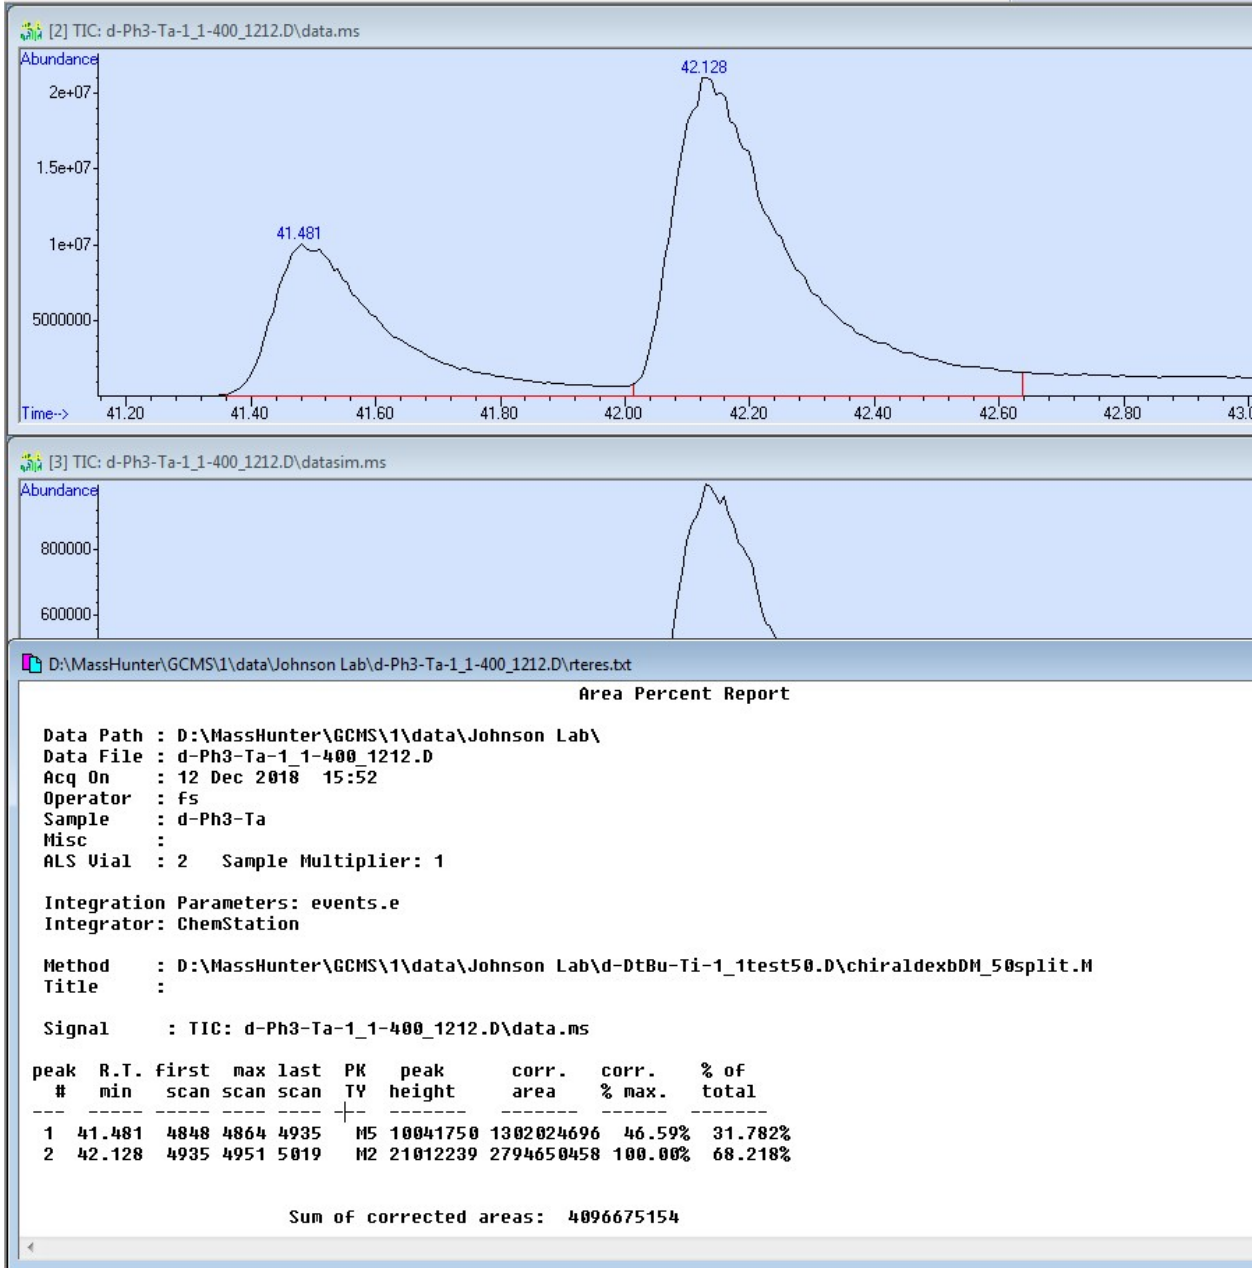

# TaPh4

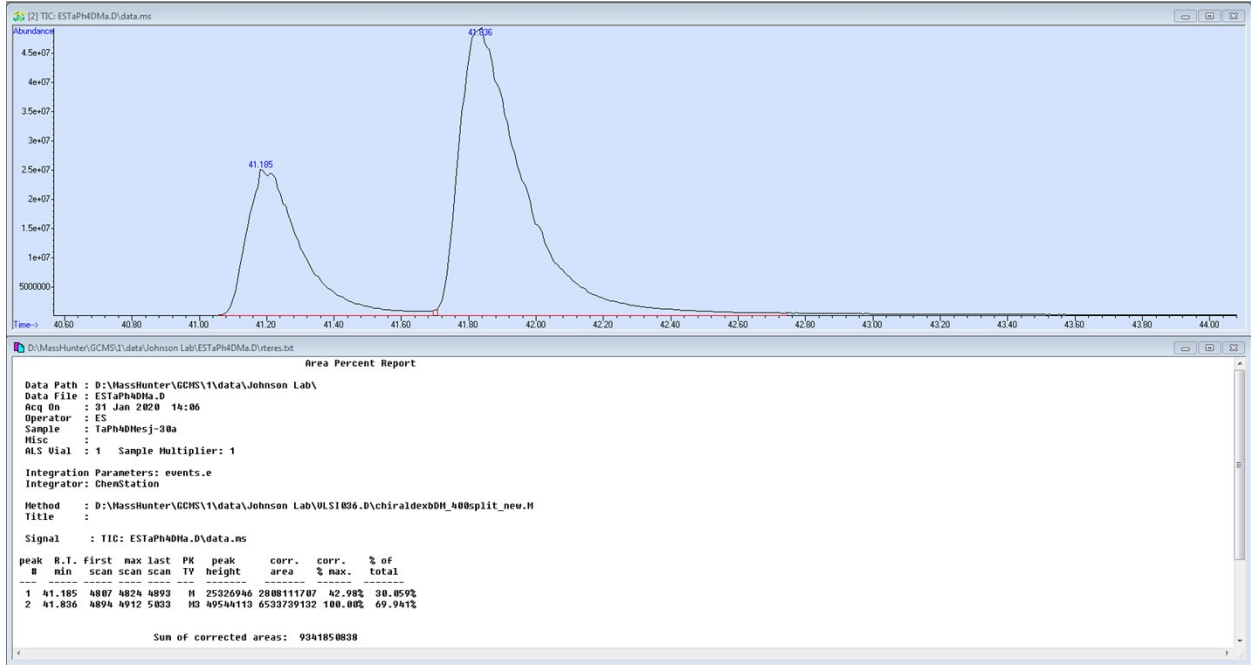

Hydroamination of hepta-4,5-dienylamine at 110 °C with *in situ* catalysts (5 mol% catalyst) to give tetrahydropyridine **2a**, *Z*- or *E*- $\alpha$ -vinylpyrrolidines *Z*- and *E*-**3a**. Retention times are  $\pm$  0.3 min from run to run.

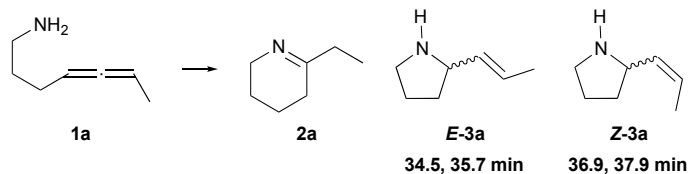

Representative GC traces are shown; each ee is an average of 2 injections for each of 2 runs.

### TiPh1

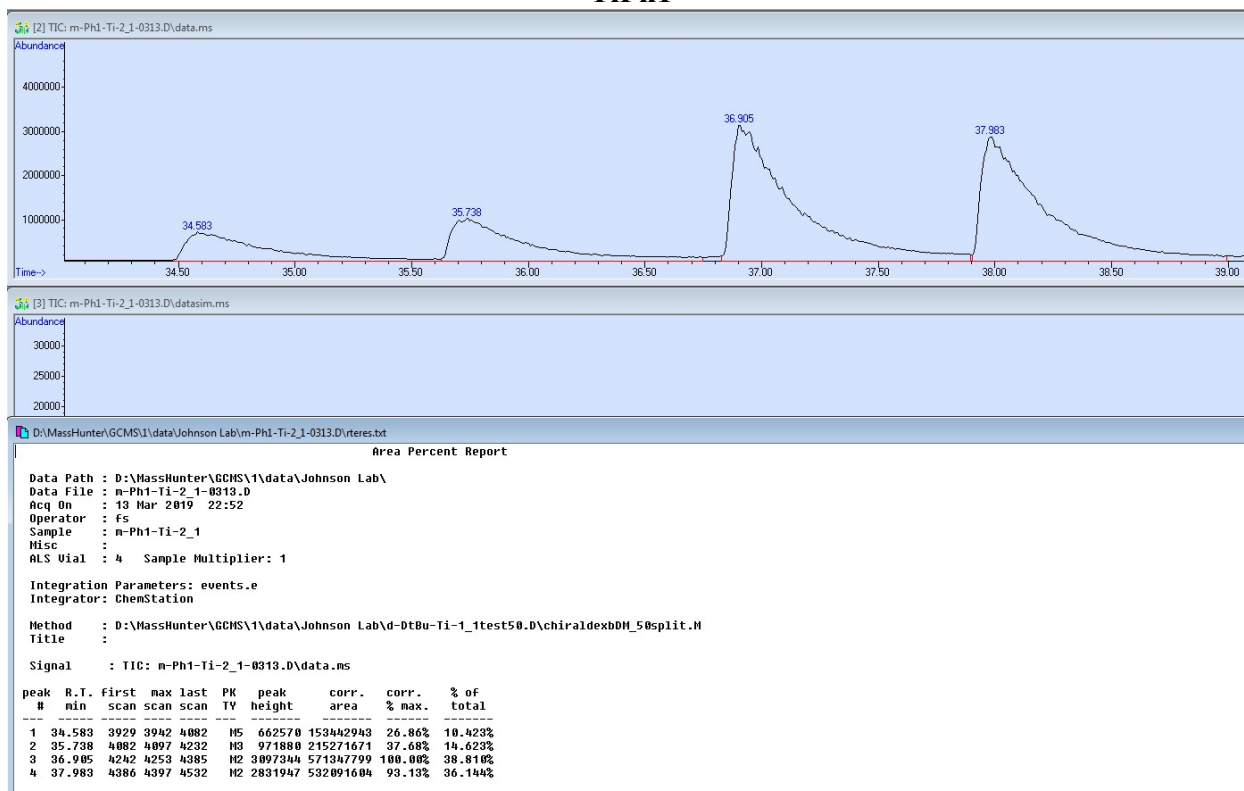

# TiPh2

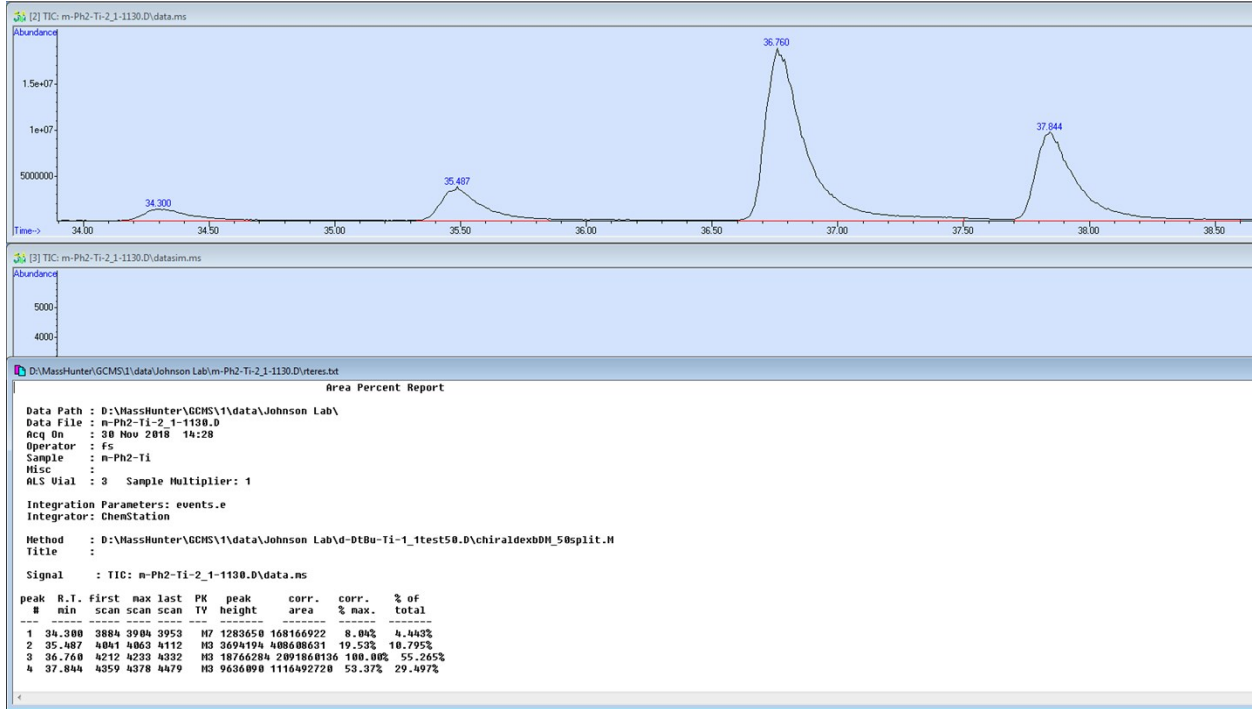

# TiPh3

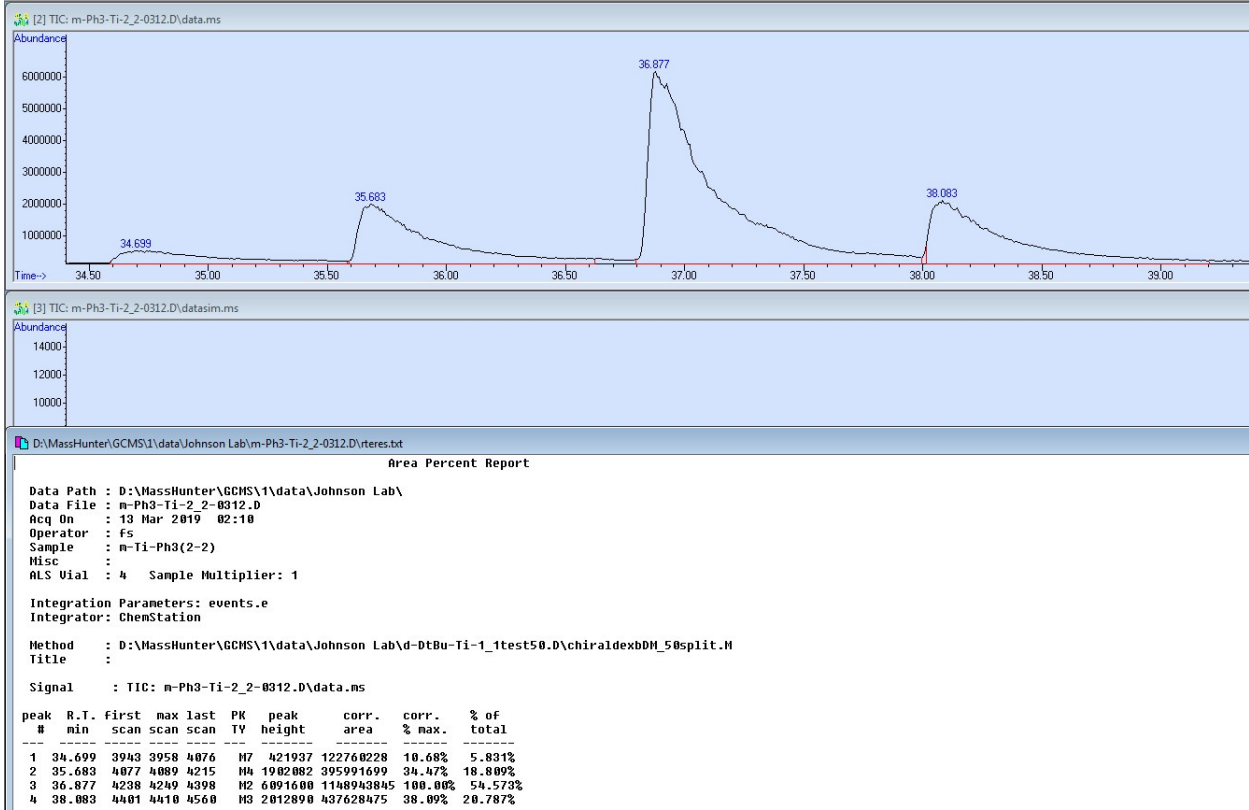

## TiPh4 (with and without impurity peak integration)

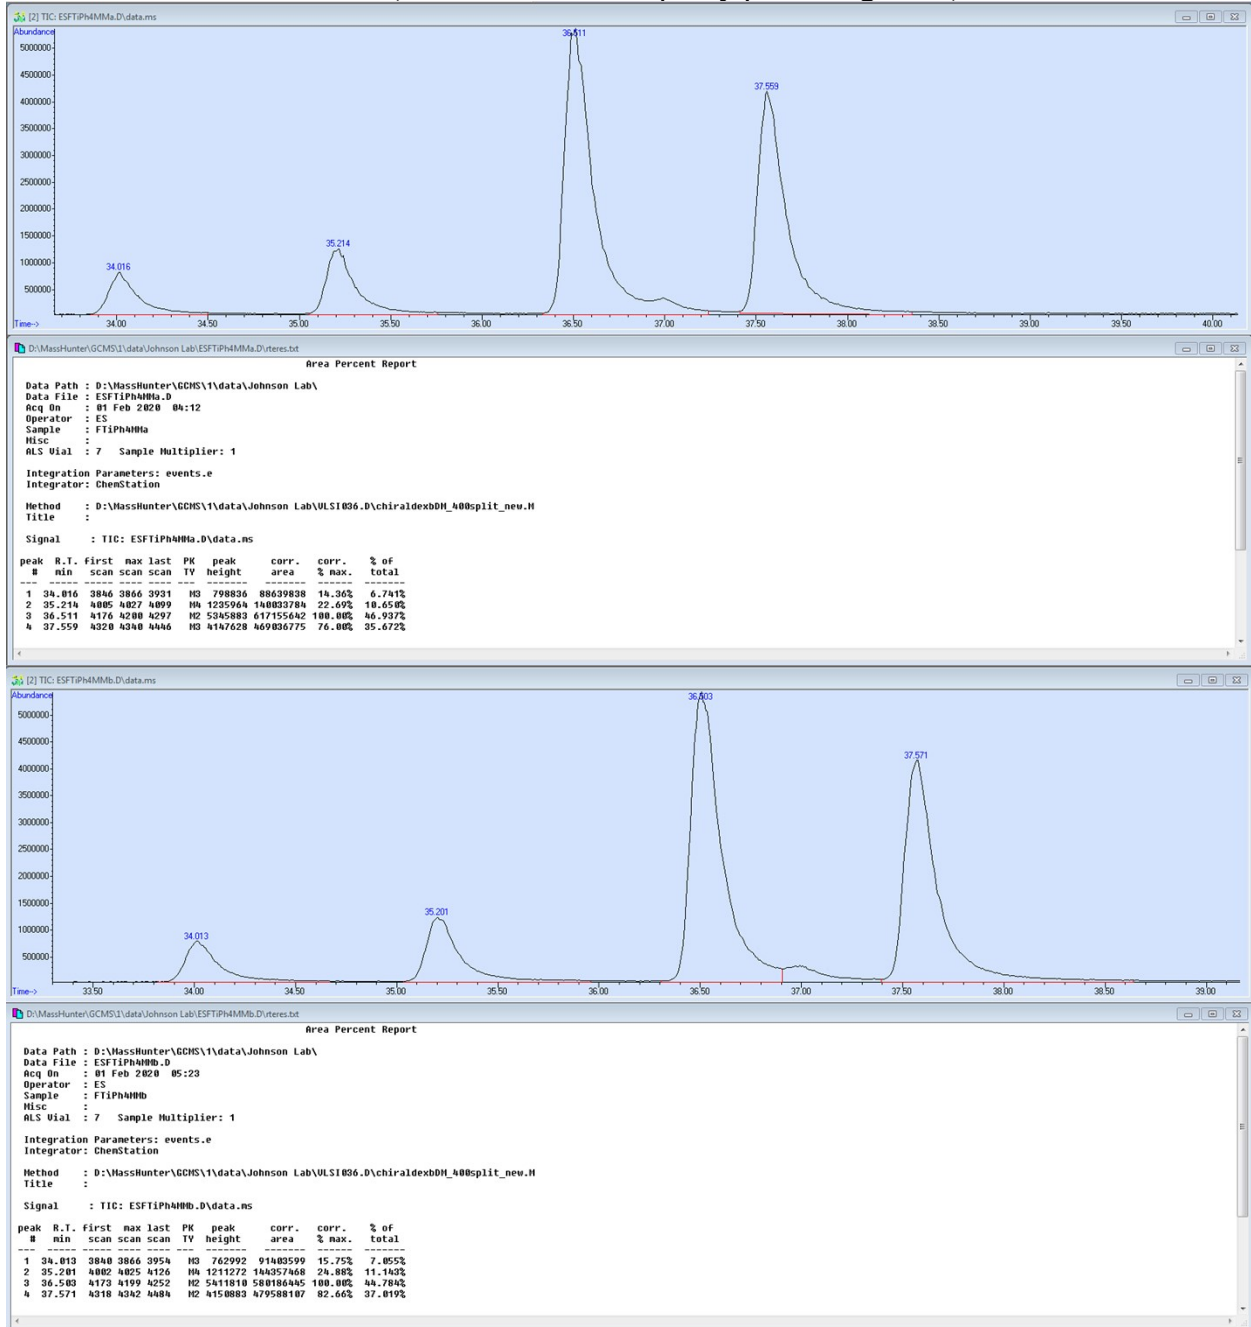



# TaPh1

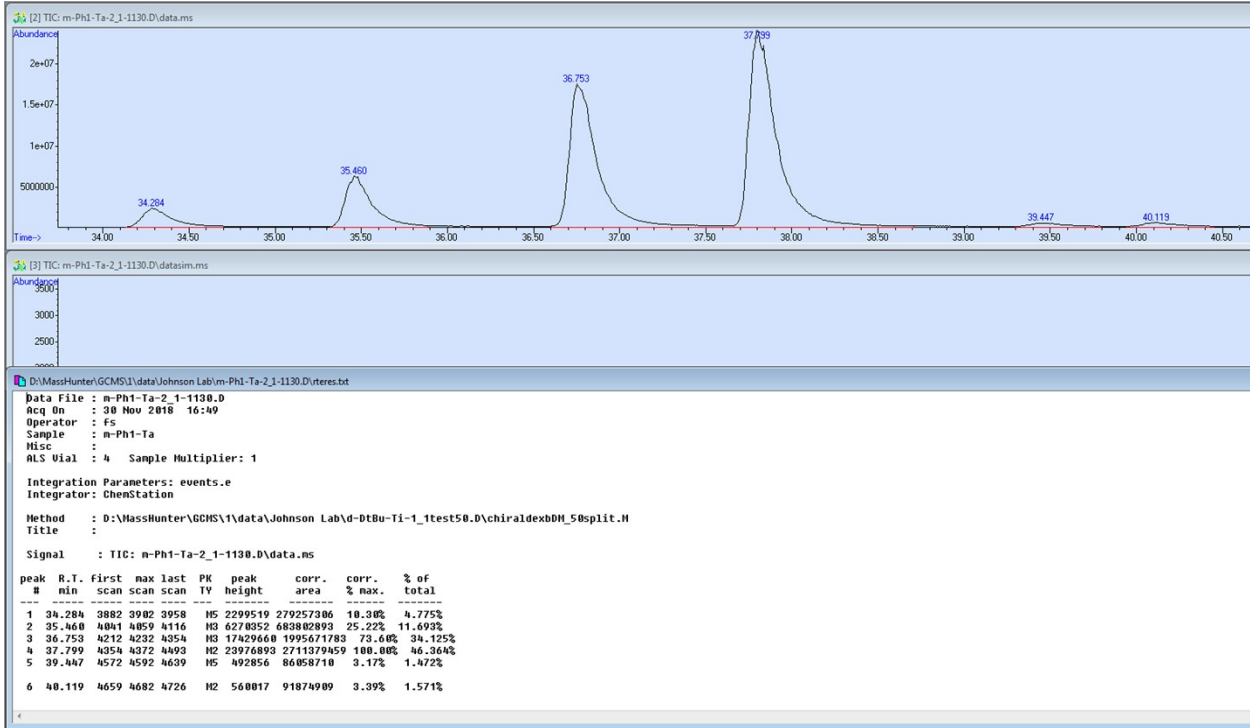

# TaPh2

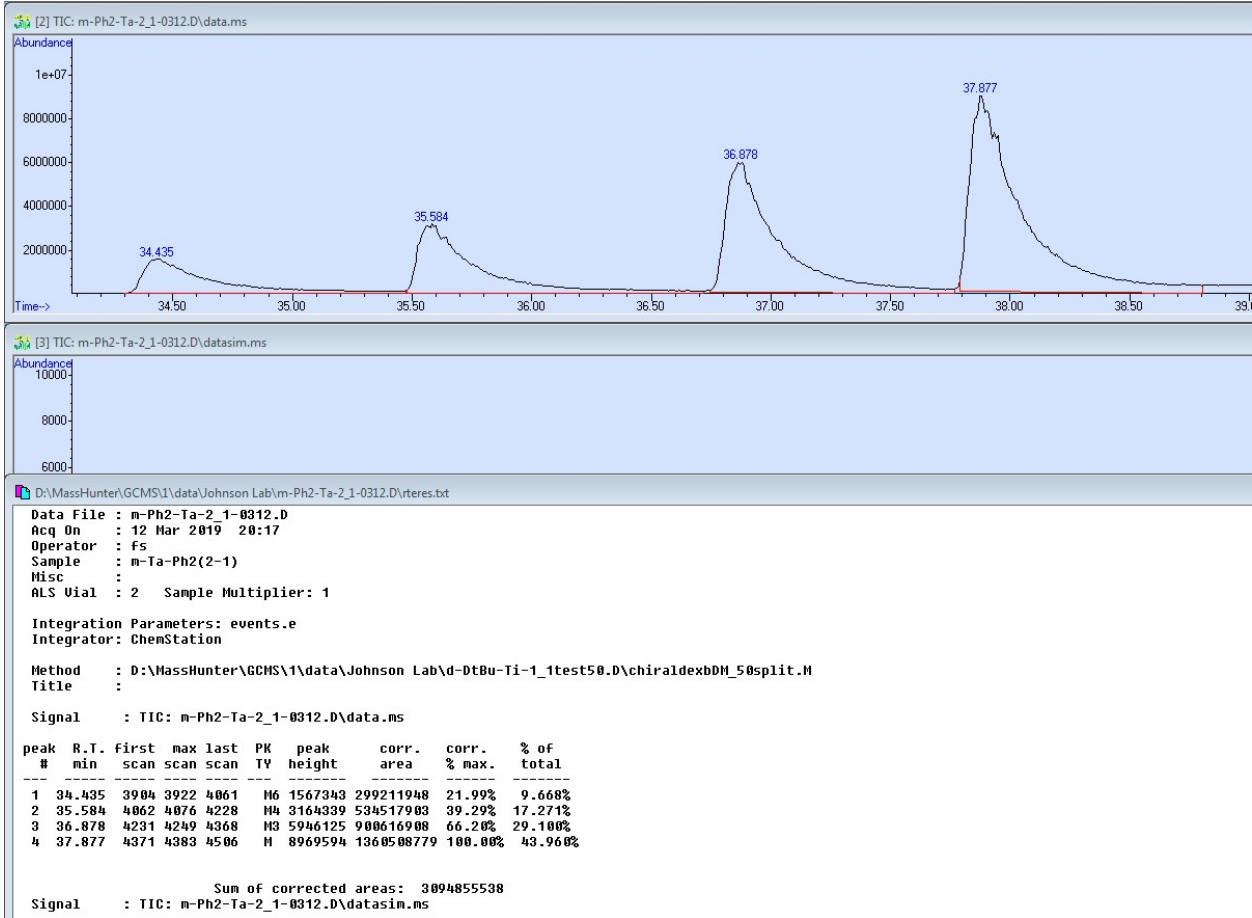

# TaPh3

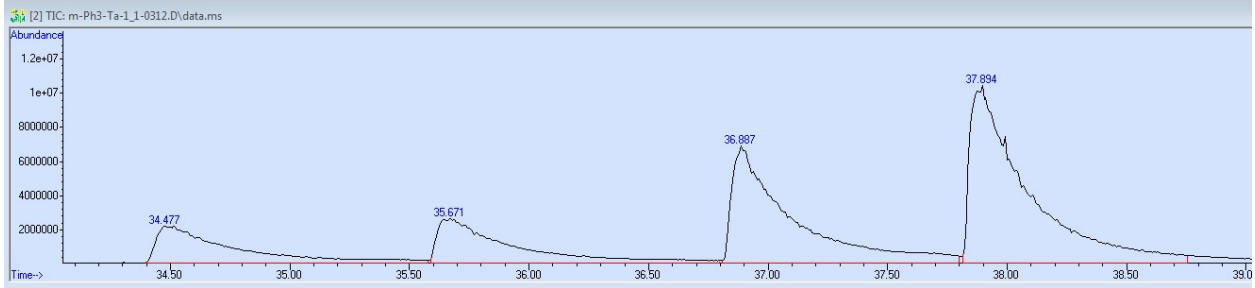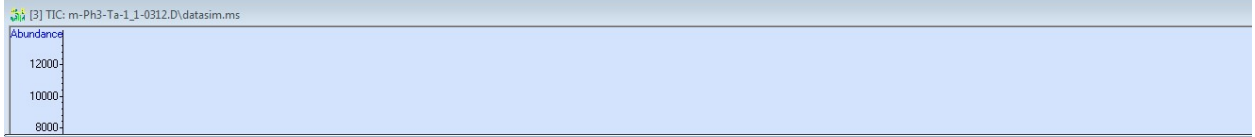

Area Percent Report

Data Path : D:\MassHunter\GCMS\1\data\Johnson Lab\  
 Data File : m-Ph3-Ta-1\_1-0312.D  
 Acq On : 13 Mar 2019 03:20  
 Operator : fs  
 Sample : m-Ta-Ph3(1-1)  
 Misc :  
 ALS Vial : 5 Sample Multiplier: 1

Integration Parameters: events.e  
 Integrator: ChemStation

Method : D:\MassHunter\GCMS\1\data\Johnson Lab\d-tBu-Ti-1\_1test50.D\chiraldexBDH\_50split.H  
 Title :

Signal : TIC: m-Ph3-Ta-1\_1-0312.D\data.ms

| peak # | R.T. min | first scan | max scan | last scan | PK TY | peak height | corr. area | corr. % max. | % of total |
|--------|----------|------------|----------|-----------|-------|-------------|------------|--------------|------------|
| 1      | 34.477   | 3917       | 3928     | 4075      | M5    | 2155021     | 483125001  | 28.14%       | 12.340%    |
| 2      | 35.671   | 4077       | 4088     | 4238      | M5    | 2602902     | 548360403  | 31.94%       | 14.016%    |
| 3      | 36.887   | 4240       | 4250     | 4372      | M3    | 6837644     | 1164435631 | 67.83%       | 29.762%    |
| 4      | 37.894   | 4374       | 4385     | 4500      | M2    | 10417592    | 1716604989 | 100.00%      | 43.875%    |

## TaPh4 (with and without impurity peak integration)

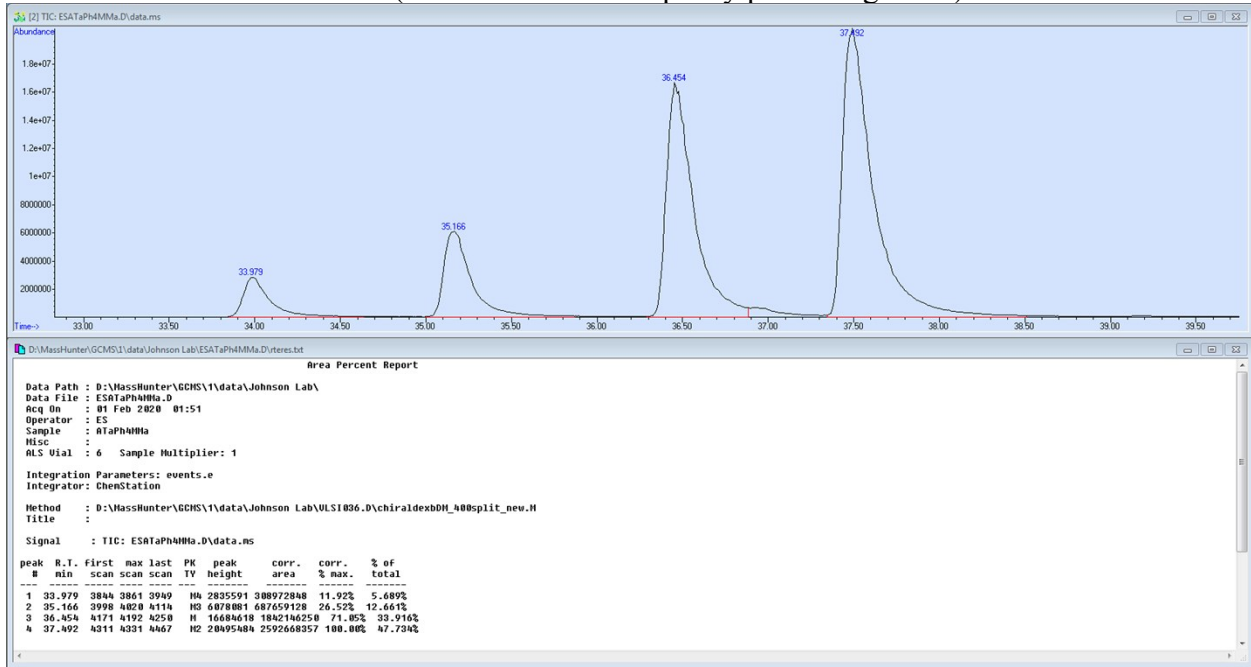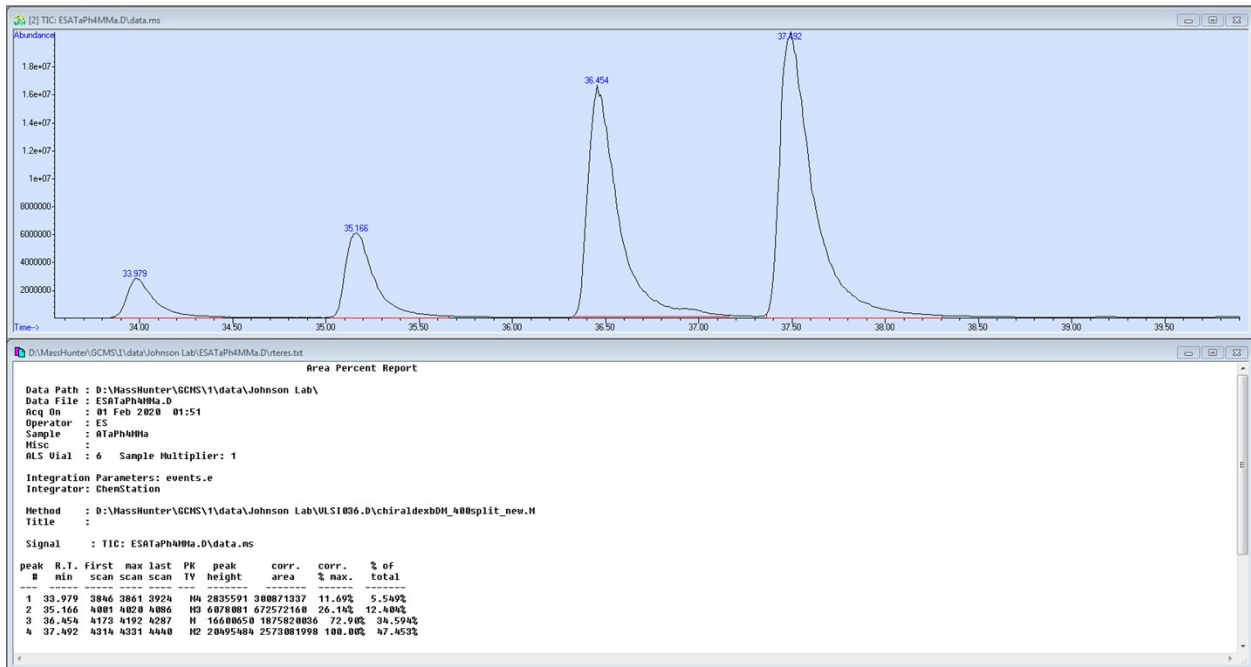

## References

- 1) Yao, J. W.; Copley, R. C. B.; Howard, J. A. K.; Allen, F. H.; Motherwell, W. D. S. *Acta Cryst.* **2001**, *B57*, 251-260.
- 2) Addison, A. W.; Rao, T. N.; Reedijk, J.; van Rijn, J.; Verschoor, G. C. *Journal of the Chemical Society, Dalton Transactions* **1984**, (7), 1349-1356.
- 3) Groves, P. *Polymer Chemistry* **2017**, *8(44)*, 6700-6708.  
(<http://doi.org/10.1039/C7PY01577A>)
- 4) Stejskal, E. O.; Tanner, J. E. *J. Chem. Phys.* **1965**, *42(1)*, 288-292.  
(<http://doi.org/10.1063/1.1695690>)
